# Supplementary material for: Deciphering the Pharmacological Mechanism of the Herb Radix Ophiopogonis in the Treatment of Nasopharyngeal Carcinoma by Integrating iTRAQ-Coupled 2-D LC-MS/MS Analysis and Network Investigation
Source: Front Pharmacol. 2019 Mar 18;10:253. doi: 10.3389/fphar.2019.00253 (PMC6431671; doi:10.3389/fphar.2019.00253)
Supplement: TABLE S1 — Chemical compounds of RO and their gene targets in response to NPC. Each compound was provided with its corresponding NPC gene targets. We only select those compounds with similarity score > 0.8. [file Table_1.XLSX]

## Sheet: Sheet1
Herb_Name	Chemical_ID	Chemical_Name	Similar_Score	Drugbank_ID	Target_Name	UniProt_Accession	Uniprot_ID	Gene_Symbol
Radix Ophiopogonis	TCMIP100203	Stigmasterol	0.8205	DB02092	Lipase 3	P32947	LIP3_CANRU	LIP3
Radix Ophiopogonis	TCMIP100203	Stigmasterol	0.8378	DB01708	Cholesterol oxidase	P22637	CHOD_BREST	CHOB
Radix Ophiopogonis	TCMIP100203	Stigmasterol	0.8378	DB01708	Nuclear receptor subfamily 1 group I member 3	Q14994	NR1I3_HUMAN	NR1I3
Radix Ophiopogonis	TCMIP100203	Stigmasterol	0.8378	DB01708	Steroid Delta-isomerase	P07445	SDIS_PSEPU	KSI
Radix Ophiopogonis	TCMIP100203	Stigmasterol	0.8378	DB01708	Bile salt sulfotransferase	Q06520	ST2A1_HUMAN	SULT2A1
Radix Ophiopogonis	TCMIP100203	Stigmasterol	0.8378	DB01708	Sulfotransferase family cytosolic 2B member 1	O00204	ST2B1_HUMAN	SULT2B1
Radix Ophiopogonis	TCMIP100328	oleanolic acid	0.8049	DB02659	Cytochrome c oxidase subunit 1	P00395	COX1_HUMAN	MT-CO1
Radix Ophiopogonis	TCMIP100328	oleanolic acid	0.8049	DB02659	Cytochrome c oxidase subunit 2	P00403	COX2_HUMAN	MT-CO2
Radix Ophiopogonis	TCMIP100328	oleanolic acid	0.8049	DB02659	Cytochrome c oxidase subunit 3	P00414	COX3_HUMAN	MT-CO3
Radix Ophiopogonis	TCMIP100328	oleanolic acid	0.8049	DB02659	Cytochrome c oxidase subunit 4 isoform 1, mitochondrial	P13073	COX41_HUMAN	COX4I1
Radix Ophiopogonis	TCMIP100328	oleanolic acid	0.8049	DB02659	Cytochrome c oxidase subunit 5A, mitochondrial	P20674	COX5A_HUMAN	COX5A
Radix Ophiopogonis	TCMIP100328	oleanolic acid	0.8049	DB02659	Cytochrome c oxidase subunit 5B, mitochondrial	P10606	COX5B_HUMAN	COX5B
Radix Ophiopogonis	TCMIP100328	oleanolic acid	0.8049	DB02659	Cytochrome c oxidase subunit 6C	P09669	COX6C_HUMAN	COX6C
Radix Ophiopogonis	TCMIP100328	oleanolic acid	0.8049	DB02659	Cytochrome c oxidase subunit 7B, mitochondrial	P24311	COX7B_HUMAN	COX7B
Radix Ophiopogonis	TCMIP100328	oleanolic acid	0.8049	DB02659	Cytochrome c oxidase subunit 7C, mitochondrial	P15954	COX7C_HUMAN	COX7C
Radix Ophiopogonis	TCMIP100328	oleanolic acid	0.8049	DB02659	Cytochrome c oxidase subunit 8A, mitochondrial	P10176	COX8A_HUMAN	COX8A
Radix Ophiopogonis	TCMIP100328	oleanolic acid	0.8049	DB02659	Cytochrome c oxidase subunit 6A2, mitochondrial	Q02221	CX6A2_HUMAN	COX6A2
Radix Ophiopogonis	TCMIP100328	oleanolic acid	0.8049	DB02659	Cytochrome c oxidase subunit 6B1	P14854	CX6B1_HUMAN	COX6B1
Radix Ophiopogonis	TCMIP100328	oleanolic acid	0.8049	DB02659	Cytochrome c oxidase subunit 7A1, mitochondrial	P24310	CX7A1_HUMAN	COX7A1
Radix Ophiopogonis	TCMIP100328	oleanolic acid	0.8049	DB02659	Gastrotropin	P51161	FABP6_HUMAN	FABP6
Radix Ophiopogonis	TCMIP100328	oleanolic acid	0.8049	DB02659	Ferrochelatase, mitochondrial	P22830	HEMH_HUMAN	FECH
Radix Ophiopogonis	TCMIP100328	oleanolic acid	0.8049	DB02659	Ferrochelatase	Q7KZA3	Q7KZA3_HUMAN	DKFZP686P18130
Radix Ophiopogonis	TCMIP100328	oleanolic acid	0.8049	DB07690	Lactaldehyde dehydrogenase	P25553	ALDA_ECOLI	ALDA
Radix Ophiopogonis	TCMIP100328	oleanolic acid	0.8049	DB07690	Cytochrome c oxidase subunit 1	P33517	COX1_RHOSH	CTAD
Radix Ophiopogonis	TCMIP100328	oleanolic acid	0.8049	DB07690	Cytochrome c oxidase subunit 2	Q03736	COX2_RHOSH	CTAC
Radix Ophiopogonis	TCMIP100328	oleanolic acid	0.8049	DB07690	PpcA	Q8GGK7	Q8GGK7_GEOSN	PPCA
Radix Ophiopogonis	TCMIP100328	oleanolic acid	0.814	DB00136	Vitamin D3 receptor	P11473	VDR_HUMAN	VDR
Radix Ophiopogonis	TCMIP100328	oleanolic acid	0.8205	DB01708	Cholesterol oxidase	P22637	CHOD_BREST	CHOB
Radix Ophiopogonis	TCMIP100328	oleanolic acid	0.8205	DB01708	Nuclear receptor subfamily 1 group I member 3	Q14994	NR1I3_HUMAN	NR1I3
Radix Ophiopogonis	TCMIP100328	oleanolic acid	0.8205	DB01708	Steroid Delta-isomerase	P07445	SDIS_PSEPU	KSI
Radix Ophiopogonis	TCMIP100328	oleanolic acid	0.8205	DB01708	Bile salt sulfotransferase	Q06520	ST2A1_HUMAN	SULT2A1
Radix Ophiopogonis	TCMIP100328	oleanolic acid	0.8205	DB01708	Sulfotransferase family cytosolic 2B member 1	O00204	ST2B1_HUMAN	SULT2B1
Radix Ophiopogonis	TCMIP100328	oleanolic acid	0.8605	DB02703	Chloramphenicol acetyltransferase 3	P00484	CAT3_ECOLX	CAT3
Radix Ophiopogonis	TCMIP100328	oleanolic acid	0.8605	DB02703	Chloramphenicol acetyltransferase	P62580	CAT_SALTI	CAT
Radix Ophiopogonis	TCMIP100328	oleanolic acid	0.8605	DB02703	Elongation factor G	P13551	EFG_THETH	FUSA
Radix Ophiopogonis	TCMIP100352	strumaroside	0.8036	DB02169	Serine/threonine-protein phosphatase PP1-gamma catalytic subunit	P36873	PP1G_HUMAN	PPP1CC
Radix Ophiopogonis	TCMIP100352	strumaroside	0.8103	DB01780	14-3-3 protein epsilon	P62258	1433E_HUMAN	YWHAE
Radix Ophiopogonis	TCMIP100352	strumaroside	0.8214	DB00390	Sodium/potassium-transporting ATPase subunit alpha-1	P05023	AT1A1_HUMAN	ATP1A1
Radix Ophiopogonis	TCMIP100647	adenosine	0.8	DB04395	Potassium-transporting ATPase B chain	P03960	ATKB_ECOLI	KDPB
Radix Ophiopogonis	TCMIP100647	adenosine	0.8	DB04395	Chaperone protein ClpB	Q9RA63	CLPB_THET8	CLPB
Radix Ophiopogonis	TCMIP100647	adenosine	0.8	DB04395	Osmolarity sensor protein EnvZ	P0AEJ4	ENVZ_ECOLI	ENVZ
Radix Ophiopogonis	TCMIP100647	adenosine	0.8	DB04395	Ephrin type-B receptor 2	P29323	EPHB2_HUMAN	EPHB2
Radix Ophiopogonis	TCMIP100647	adenosine	0.8	DB04395	6-phosphofructo-2-kinase/fructose-2,6-bisphosphatase 4	Q16877	F264_HUMAN	PFKFB4
Radix Ophiopogonis	TCMIP100647	adenosine	0.8	DB04395	Galactokinase	P51570	GALK1_HUMAN	GALK1
Radix Ophiopogonis	TCMIP100647	adenosine	0.8	DB04395	Type II secretion system protein E	P37093	GSPE_VIBCH	EPSE
Radix Ophiopogonis	TCMIP100647	adenosine	0.8	DB04395	ATP-dependent protease ATPase subunit HslU	P0A6H7	HSLU_SHIFL	HSLU
Radix Ophiopogonis	TCMIP100647	adenosine	0.8	DB04395	Kinesin-like protein KIF2C	Q99661	KIF2C_HUMAN	KIF2C
Radix Ophiopogonis	TCMIP100647	adenosine	0.8	DB04395	Aminoglycoside 3'-phosphotransferase	P0A3Y5	KKA3_ENTFL	APHA
Radix Ophiopogonis	TCMIP100647	adenosine	0.8	DB04395	DNA topoisomerase 4 subunit B	P20083	PARE_ECOLI	PARE
Radix Ophiopogonis	TCMIP100647	adenosine	0.8	DB04395	Sensor protein PhoQ	P23837	PHOQ_ECOLI	PHOQ
Radix Ophiopogonis	TCMIP100647	adenosine	0.8	DB04395	TrwB	Q04230	Q04230_ECOLX	TRWB
Radix Ophiopogonis	TCMIP100647	adenosine	0.8	DB04395	Rod shape-determining protein MreB	Q9WZ57	Q9WZ57_THEMA	TM_0588
Radix Ophiopogonis	TCMIP100647	adenosine	0.8	DB04395	DNA repair protein RAD51 homolog 1	Q06609	RAD51_HUMAN	RAD51
Radix Ophiopogonis	TCMIP100647	adenosine	0.8	DB04395	Protein RecA	P0A7G9	RECA_SHIFL	RECA
Radix Ophiopogonis	TCMIP100647	adenosine	0.8	DB04395	T-complex protein 1 subunit gamma	P49368	TCPG_HUMAN	CCT3
Radix Ophiopogonis	TCMIP100647	adenosine	0.8	DB04395	Transitional endoplasmic reticulum ATPase	P55072	TERA_HUMAN	VCP
Radix Ophiopogonis	TCMIP100647	adenosine	0.8	DB04395	Transient receptor potential cation channel subfamily M member 7	Q96QT4	TRPM7_HUMAN	TRPM7
Radix Ophiopogonis	TCMIP100647	adenosine	0.803	DB02527	Cyclic nucleotide-gated potassium channel mll3241	Q98GN8	CNGK1_RHILO	MLL3241
Radix Ophiopogonis	TCMIP100647	adenosine	0.803	DB02527	cAMP-activated global transcriptional regulator CRP	P0ACJ8	CRP_ECOLI	CRP
Radix Ophiopogonis	TCMIP100647	adenosine	0.803	DB02527	cAMP-dependent protein kinase type II-beta regulatory subunit	P31323	KAP3_HUMAN	PRKAR2B
Radix Ophiopogonis	TCMIP100647	adenosine	0.803	DB02527	Adenylate cyclase	P94182	P94182_9NOST	CYAB2
Radix Ophiopogonis	TCMIP100647	adenosine	0.8033	DB03716	5'-fluoro-5'-deoxy-adenosine synthase	Q70GK9	Q70GK9_STRCT	FLA
Radix Ophiopogonis	TCMIP100647	adenosine	0.806	DB00552	Adenosine deaminase	P00813	ADA_HUMAN	ADA
Radix Ophiopogonis	TCMIP100647	adenosine	0.806	DB01752	Protein arginine N-methyltransferase 1	Q99873	ANM1_HUMAN	PRMT1
Radix Ophiopogonis	TCMIP100647	adenosine	0.806	DB01752	Protein arginine N-methyltransferase 3	O60678	ANM3_HUMAN	PRMT3
Radix Ophiopogonis	TCMIP100647	adenosine	0.806	DB01752	Cobalt-precorrin-4 C(11)-methyltransferase	O87696	CBIF_BACME	CBIF
Radix Ophiopogonis	TCMIP100647	adenosine	0.806	DB01752	Chemotaxis protein methyltransferase	P07801	CHER_SALTY	CHER
Radix Ophiopogonis	TCMIP100647	adenosine	0.806	DB01752	Carminomycin 4-O-methyltransferase	Q06528	CM4T_STRPE	DNRK
Radix Ophiopogonis	TCMIP100647	adenosine	0.806	DB01752	Cyclopropane mycolic acid synthase 2	P0A5P0	CMAS2_MYCTU	CMAA2
Radix Ophiopogonis	TCMIP100647	adenosine	0.806	DB01752	Cyclopropane mycolic acid synthase 3	Q7D9R5	CMAS3_MYCTU	PCAA
Radix Ophiopogonis	TCMIP100647	adenosine	0.806	DB01752	Catechol O-methyltransferase domain-containing protein 1	Q86VU5	CMTD1_HUMAN	COMTD1
Radix Ophiopogonis	TCMIP100647	adenosine	0.806	DB01752	Siroheme synthase	P25924	CYSG_SALTY	CYSG
Radix Ophiopogonis	TCMIP100647	adenosine	0.806	DB01752	DNA adenine methylase	P04392	DMA_BPT4	DAM
Radix Ophiopogonis	TCMIP100647	adenosine	0.806	DB01752	Diphthine synthase	Q9H2P9	DPH5_HUMAN	DPH5
Radix Ophiopogonis	TCMIP100647	adenosine	0.806	DB01752	rRNA adenine N-6-methyltransferase	P13956	ERM_BACIU	ERMC'
Radix Ophiopogonis	TCMIP100647	adenosine	0.806	DB01752	Cap-specific mRNA (nucleoside-2'-O-)-methyltransferase	P07617	MCE_VACCW	PAPS
Radix Ophiopogonis	TCMIP100647	adenosine	0.806	DB01752	Modification methylase HhaI	P05102	MTH1_HAEPH	HHAIM
Radix Ophiopogonis	TCMIP100647	adenosine	0.806	DB01752	Modification methylase PvuII	P11409	MTP2_PROHU	PVUIIM
Radix Ophiopogonis	TCMIP100647	adenosine	0.806	DB01752	Modification methylase RsrI	P14751	MTR1_RHOSH	RSRIM
Radix Ophiopogonis	TCMIP100647	adenosine	0.806	DB01752	Modification methylase TaqI	P14385	MTTA_THEAQ	TAQIM
Radix Ophiopogonis	TCMIP100647	adenosine	0.806	DB01752	Protein-L-isoaspartate(D-aspartate) O-methyltransferase	P22061	PIMT_HUMAN	PCMT1
Radix Ophiopogonis	TCMIP100647	adenosine	0.806	DB01752	Protein-L-isoaspartate O-methyltransferase	Q56308	PIMT_THEMA	PCM
Radix Ophiopogonis	TCMIP100647	adenosine	0.806	DB01752	Phenylethanolamine N-methyltransferase	P11086	PNMT_HUMAN	PNMT
Radix Ophiopogonis	TCMIP100647	adenosine	0.806	DB01752	Release factor glutamine methyltransferase	P0ACC1	PRMC_ECOLI	HEMK
Radix Ophiopogonis	TCMIP100647	adenosine	0.806	DB01752	Release factor glutamine methyltransferase	Q9WYV8	PRMC_THEMA	TM_0488
Radix Ophiopogonis	TCMIP100647	adenosine	0.806	DB01752	RdmB	Q54527	Q54527_9ACTO	RDMB
Radix Ophiopogonis	TCMIP100647	adenosine	0.806	DB01752	Uncharacterized protein	Q5SKH6	Q5SKH6_THET8	TTHA0667
Radix Ophiopogonis	TCMIP100647	adenosine	0.806	DB01752	Ribosomal RNA small subunit methyltransferase H	Q9WZX6	RSMH_THEMA	RSMH
Radix Ophiopogonis	TCMIP100647	adenosine	0.806	DB01752	Histone-lysine N-methyltransferase SETD7	Q8WTS6	SETD7_HUMAN	SETD7
Radix Ophiopogonis	TCMIP100647	adenosine	0.806	DB01752	Uroporphyrinogen-III C-methyltransferase	P21631	SUMT_PSEDE	COBA
Radix Ophiopogonis	TCMIP100647	adenosine	0.806	DB01752	tRNA (guanine-N(1)-)-methyltransferase	P43912	TRMD_HAEIN	TRMD
Radix Ophiopogonis	TCMIP100647	adenosine	0.806	DB01752	tRNA (guanine-N(1)-)-methyltransferase	P0A876	TRMD_SHIFL	TRMD
Radix Ophiopogonis	TCMIP100647	adenosine	0.806	DB01752	tRNA (cytidine(34)-2'-O)-methyltransferase	P44868	TRML_HAEIN	TRML
Radix Ophiopogonis	TCMIP100647	adenosine	0.806	DB03423	tRNA (cmo5U34)-methyltransferase	P43985	CMOA_HAEIN	CMOA
Radix Ophiopogonis	TCMIP100647	adenosine	0.8065	DB03068	Cytidine deaminase	P0ABF6	CDD_ECOLI	CDD
Radix Ophiopogonis	TCMIP100647	adenosine	0.8088	DB01842	Aminoglycoside 2'-N-acetyltransferase	P0A5N0	AAC2_MYCTU	AAC
Radix Ophiopogonis	TCMIP100647	adenosine	0.8095	DB02745	U6 snRNA-associated Sm-like protein LSm6	P62312	LSM6_HUMAN	LSM6
Radix Ophiopogonis	TCMIP100647	adenosine	0.8095	DB02745	Nucleoside-specific channel-forming protein tsx	P0A927	TSX_ECOLI	TSX
Radix Ophiopogonis	TCMIP100647	adenosine	0.8116	DB01690	Dephospho-CoA kinase	P0A6I9	COAE_ECOLI	COAE
Radix Ophiopogonis	TCMIP100647	adenosine	0.8116	DB01717	Adenylate kinase isoenzyme 1	P00568	KAD1_HUMAN	AK1
Radix Ophiopogonis	TCMIP100647	adenosine	0.8116	DB01717	Adenylate kinase 2, mitochondrial	P54819	KAD2_HUMAN	AK2
Radix Ophiopogonis	TCMIP100647	adenosine	0.8116	DB01717	Adenylate kinase 8	Q96MA6	KAD8_HUMAN	AK8
Radix Ophiopogonis	TCMIP100647	adenosine	0.8116	DB01717	Adenylate kinase	P16304	KAD_BACSU	ADK
Radix Ophiopogonis	TCMIP100647	adenosine	0.8116	DB01717	Adenylate kinase	P69441	KAD_ECOLI	ADK
Radix Ophiopogonis	TCMIP100647	adenosine	0.8116	DB01717	Adenylate kinase	P27142	KAD_GEOSE	ADK
Radix Ophiopogonis	TCMIP100647	adenosine	0.8116	DB02059	Elongation factor 2	P13639	EF2_HUMAN	EEF2
Radix Ophiopogonis	TCMIP100647	adenosine	0.8116	DB02059	ADP compounds hydrolase NudE	P45799	NUDE_ECOLI	NUDE
Radix Ophiopogonis	TCMIP100647	adenosine	0.8116	DB02059	p-hydroxybenzoate hydroxylase	P00438	PHHY_PSEFL	POBA
Radix Ophiopogonis	TCMIP100647	adenosine	0.8116	DB02059	CDP-glucose 4,6-dehydratase	P26397	RFBG_SALTY	RFBG
Radix Ophiopogonis	TCMIP100647	adenosine	0.8116	DB02059	NAD-dependent protein deacetylase sirtuin-3, mitochondrial	Q9NTG7	SIR3_HUMAN	SIRT3
Radix Ophiopogonis	TCMIP100647	adenosine	0.8116	DB02059	NAD-dependent protein deacylase sirtuin-5, mitochondrial	Q9NXA8	SIR5_HUMAN	SIRT5
Radix Ophiopogonis	TCMIP100647	adenosine	0.8143	DB01774	ADP-L-glycero-D-manno-heptose-6-epimerase	P67910	HLDD_ECOLI	HLDD
Radix Ophiopogonis	TCMIP100647	adenosine	0.8182	DB00242	DNA polymerase epsilon catalytic subunit A	Q07864	DPOE1_HUMAN	POLE
Radix Ophiopogonis	TCMIP100647	adenosine	0.8182	DB00242	DNA polymerase epsilon subunit 2	P56282	DPOE2_HUMAN	POLE2
Radix Ophiopogonis	TCMIP100647	adenosine	0.8182	DB00242	DNA polymerase epsilon subunit 3	Q9NRF9	DPOE3_HUMAN	POLE3
Radix Ophiopogonis	TCMIP100647	adenosine	0.8182	DB00242	DNA polymerase epsilon subunit 4	Q9NR33	DPOE4_HUMAN	POLE4
Radix Ophiopogonis	TCMIP100647	adenosine	0.8182	DB00242	DNA polymerase alpha catalytic subunit	P09884	DPOLA_HUMAN	POLA1
Radix Ophiopogonis	TCMIP100647	adenosine	0.8182	DB00242	Purine nucleoside phosphorylase	P00491	PNPH_HUMAN	PNP
Radix Ophiopogonis	TCMIP100647	adenosine	0.8182	DB00242	Ribonucleoside-diphosphate reductase large subunit	P23921	RIR1_HUMAN	RRM1
Radix Ophiopogonis	TCMIP100647	adenosine	0.8182	DB00242	Ribonucleoside-diphosphate reductase subunit M2 B	Q7LG56	RIR2B_HUMAN	RRM2B
Radix Ophiopogonis	TCMIP100647	adenosine	0.8182	DB00242	Ribonucleoside-diphosphate reductase subunit M2	P31350	RIR2_HUMAN	RRM2
Radix Ophiopogonis	TCMIP100647	adenosine	0.8209	DB00131	5'-AMP-activated protein kinase subunit beta-1	Q9Y478	AAKB1_HUMAN	PRKAB1
Radix Ophiopogonis	TCMIP100647	adenosine	0.8209	DB00131	5'-AMP-activated protein kinase subunit beta-2	O43741	AAKB2_HUMAN	PRKAB2
Radix Ophiopogonis	TCMIP100647	adenosine	0.8209	DB00131	5'-AMP-activated protein kinase catalytic subunit alpha-1	Q13131	AAPK1_HUMAN	PRKAA1
Radix Ophiopogonis	TCMIP100647	adenosine	0.8209	DB00131	Acetyl-coenzyme A synthetase 2-like, mitochondrial	Q9NUB1	ACS2L_HUMAN	ACSS1
Radix Ophiopogonis	TCMIP100647	adenosine	0.8209	DB00131	Acetyl-coenzyme A synthetase, cytoplasmic	Q9NR19	ACSA_HUMAN	ACSS2
Radix Ophiopogonis	TCMIP100647	adenosine	0.8209	DB00131	Long-chain-fatty-acid--CoA ligase 1	P33121	ACSL1_HUMAN	ACSL1
Radix Ophiopogonis	TCMIP100647	adenosine	0.8209	DB00131	Adenylate cyclase type 1	Q08828	ADCY1_HUMAN	ADCY1
Radix Ophiopogonis	TCMIP100647	adenosine	0.8209	DB00131	Adenosine kinase	P55263	ADK_HUMAN	ADK
Radix Ophiopogonis	TCMIP100647	adenosine	0.8209	DB00131	Cyclic AMP-responsive element-binding protein 1	P16220	CREB1_HUMAN	CREB1
Radix Ophiopogonis	TCMIP100647	adenosine	0.8209	DB00131	Fructose-1,6-bisphosphatase 1	P09467	F16P1_HUMAN	FBP1
Radix Ophiopogonis	TCMIP100647	adenosine	0.8209	DB00131	Histidine triad nucleotide-binding protein 1	P49773	HINT1_HUMAN	HINT1
Radix Ophiopogonis	TCMIP100647	adenosine	0.8209	DB00131	cAMP-specific 3',5'-cyclic phosphodiesterase 4B	Q07343	PDE4B_HUMAN	PDE4B
Radix Ophiopogonis	TCMIP100647	adenosine	0.8209	DB00131	cAMP-specific 3',5'-cyclic phosphodiesterase 4D	Q08499	PDE4D_HUMAN	PDE4D
Radix Ophiopogonis	TCMIP100647	adenosine	0.8209	DB00131	Serine/threonine-protein kinase pim-1	P11309	PIM1_HUMAN	PIM1
Radix Ophiopogonis	TCMIP100647	adenosine	0.8209	DB02373	Bis(5'-adenosyl)-triphosphatase	P49789	FHIT_HUMAN	FHIT
Radix Ophiopogonis	TCMIP100647	adenosine	0.8235	DB00171	Cytosolic purine 5'-nucleotidase	P49902	5NTC_HUMAN	NT5C2
Radix Ophiopogonis	TCMIP100647	adenosine	0.8235	DB00171	ATP-binding cassette sub-family A member 1	O95477	ABCA1_HUMAN	ABCA1
Radix Ophiopogonis	TCMIP100647	adenosine	0.8235	DB00171	Bile salt export pump	O95342	ABCBB_HUMAN	ABCB11
Radix Ophiopogonis	TCMIP100647	adenosine	0.8235	DB00171	ATP-binding cassette sub-family C member 8	Q09428	ABCC8_HUMAN	ABCC8
Radix Ophiopogonis	TCMIP100647	adenosine	0.8235	DB00171	ATP-binding cassette sub-family C member 9	O60706	ABCC9_HUMAN	ABCC9
Radix Ophiopogonis	TCMIP100647	adenosine	0.8235	DB00171	ATP-binding cassette sub-family G member 1	P45844	ABCG1_HUMAN	ABCG1
Radix Ophiopogonis	TCMIP100647	adenosine	0.8235	DB00171	Tyrosine-protein kinase ABL1	P00519	ABL1_HUMAN	ABL1
Radix Ophiopogonis	TCMIP100647	adenosine	0.8235	DB00171	Abelson tyrosine-protein kinase 2	P42684	ABL2_HUMAN	ABL2
Radix Ophiopogonis	TCMIP100647	adenosine	0.8235	DB00171	Activated CDC42 kinase 1	Q07912	ACK1_HUMAN	TNK2
Radix Ophiopogonis	TCMIP100647	adenosine	0.8235	DB00171	Activin receptor type-1B	P36896	ACV1B_HUMAN	ACVR1B
Radix Ophiopogonis	TCMIP100647	adenosine	0.8235	DB00171	Serine/threonine-protein kinase receptor R3	P37023	ACVL1_HUMAN	ACVRL1
Radix Ophiopogonis	TCMIP100647	adenosine	0.8235	DB00171	Activin receptor type-1	Q04771	ACVR1_HUMAN	ACVR1
Radix Ophiopogonis	TCMIP100647	adenosine	0.8235	DB00171	ADP/ATP translocase 1	P12235	ADT1_HUMAN	SLC25A4
Radix Ophiopogonis	TCMIP100647	adenosine	0.8235	DB00171	AFG3-like protein 2	Q9Y4W6	AFG32_HUMAN	AFG3L2
Radix Ophiopogonis	TCMIP100647	adenosine	0.8235	DB00171	RAC-alpha serine/threonine-protein kinase	P31749	AKT1_HUMAN	AKT1
Radix Ophiopogonis	TCMIP100647	adenosine	0.8235	DB00171	Anti-Muellerian hormone type-2 receptor	Q16671	AMHR2_HUMAN	AMHR2
Radix Ophiopogonis	TCMIP100647	adenosine	0.8235	DB00171	Apoptotic protease-activating factor 1	O14727	APAF_HUMAN	APAF1
Radix Ophiopogonis	TCMIP100647	adenosine	0.8235	DB00171	Serine/threonine-protein kinase A-Raf	P10398	ARAF_HUMAN	ARAF
Radix Ophiopogonis	TCMIP100647	adenosine	0.8235	DB00171	Beta-adrenergic receptor kinase 1	P25098	ARBK1_HUMAN	ADRBK1
Radix Ophiopogonis	TCMIP100647	adenosine	0.8235	DB00171	Beta-adrenergic receptor kinase 2	P35626	ARBK2_HUMAN	ADRBK2
Radix Ophiopogonis	TCMIP100647	adenosine	0.8235	DB00171	ATPase ASNA1	O43681	ASNA_HUMAN	ASNA1
Radix Ophiopogonis	TCMIP100647	adenosine	0.8235	DB00171	Cyclin-dependent kinase 15	Q96Q40	CDK15_HUMAN	CDK15
Radix Ophiopogonis	TCMIP100647	adenosine	0.8235	DB00171	Multidrug resistance protein 1	P08183	MDR1_HUMAN	ABCB1
Radix Ophiopogonis	TCMIP100647	adenosine	0.8235	DB00171	Canalicular multispecific organic anion transporter 1	Q92887	MRP2_HUMAN	ABCC2
Radix Ophiopogonis	TCMIP100647	adenosine	0.8235	DB00171	NEDD8-activating enzyme E1 regulatory subunit	Q13564	ULA1_HUMAN	NAE1
Radix Ophiopogonis	TCMIP100647	adenosine	0.8235	DB02738	Diadenosine hexaphosphate hydrolase	Q75UV1	NDX1_THETH	NDX1
Radix Ophiopogonis	TCMIP100647	adenosine	0.8261	DB08437	Leucyl/phenylalanyl-tRNA--protein transferase	P0A8P1	LFTR_ECOLI	AAT
Radix Ophiopogonis	TCMIP100647	adenosine	0.8361	DB00811	Ectonucleotide pyrophosphatase/phosphodiesterase family member 1	P22413	ENPP1_HUMAN	ENPP1
Radix Ophiopogonis	TCMIP100647	adenosine	0.8361	DB00811	RNA-directed RNA polymerase L	P26676	L_PI2HT	L
Radix Ophiopogonis	TCMIP100647	adenosine	0.8361	DB00811	RNA-directed RNA polymerase catalytic subunit	P16502	RDRP_I56A0	PB1
Radix Ophiopogonis	TCMIP100647	adenosine	0.8413	DB00928	DNA (cytosine-5)-methyltransferase 1	P26358	DNMT1_HUMAN	DNMT1
Radix Ophiopogonis	TCMIP100647	adenosine	0.8413	DB07052	Adenosylhomocysteinase	P60176	SAHH_MYCTU	AHCY
Radix Ophiopogonis	TCMIP100647	adenosine	0.8507	DB07045	BAG family molecular chaperone regulator 1	Q99933	BAG1_HUMAN	BAG1
Radix Ophiopogonis	TCMIP100647	adenosine	0.8507	DB07045	Heat shock cognate 71 kDa protein	P11142	HSP7C_HUMAN	HSPA8
Radix Ophiopogonis	TCMIP100647	adenosine	0.871	DB00987	DNA polymerase beta	P06746	DPOLB_HUMAN	POLB
Radix Ophiopogonis	TCMIP100647	adenosine	0.871	DB02097	Uridine-cytidine kinase 2	Q9BZX2	UCK2_HUMAN	UCK2
Radix Ophiopogonis	TCMIP100647	adenosine	0.918	DB04604	Serine/threonine-protein kinase haspin	Q8TF76	HASP_HUMAN	GSG2
Radix Ophiopogonis	TCMIP100647	adenosine	0.9194	DB02857	Purine nucleoside phosphorylase	Q5SID9	Q5SID9_THET8	TTHA1435
Radix Ophiopogonis	TCMIP100647	adenosine	1	DB00194	DNA polymerase catalytic subunit	P03198	DPOL_EBVB9	BALF5
Radix Ophiopogonis	TCMIP100647	adenosine	1	DB00194	Thymidine kinase	Q9QNF7	KITH_HHV1	TK
Radix Ophiopogonis	TCMIP100647	adenosine	1	DB00194	Thymidine kinase	P09250	KITH_VZVD	ORF36
Radix Ophiopogonis	TCMIP100647	adenosine	1	DB00640	Adenosine receptor A3	P0DMS8	AA3R_HUMAN	ADORA3
Radix Ophiopogonis	TCMIP102826	N-trans-Feruloyltyramine	0.8537	DB08753	Peptide deformylase	Q672W7	Q672W7_HELPX	DEF
Radix Ophiopogonis	TCMIP103317	Ruscogenin	0.8462	DB02169	Serine/threonine-protein phosphatase PP1-gamma catalytic subunit	P36873	PP1G_HUMAN	PPP1CC
Radix Ophiopogonis	TCMIP103317	Ruscogenin	0.8654	DB00390	Sodium/potassium-transporting ATPase subunit alpha-1	P05023	AT1A1_HUMAN	ATP1A1
Radix Ophiopogonis	TCMIP104157	6-Aldehydo-isoophiopogone B	0.8	DB01094	Microsomal triglyceride transfer protein large subunit	P55157	MTP_HUMAN	MTTP
Radix Ophiopogonis	TCMIP104157	6-Aldehydo-isoophiopogone B	0.8	DB01094	Sterol O-acyltransferase 2	O75908	SOAT2_HUMAN	SOAT2
Radix Ophiopogonis	TCMIP104157	6-Aldehydo-isoophiopogone B	0.8108	DB02593	Beta-lactamase type II	P25910	BLAB_BACFG	CCRA
Radix Ophiopogonis	TCMIP104158	Borneol-2-O-β-D-apiofuranosyl(1→6)-β-D-glucopyranoside	0.8	DB02169	Serine/threonine-protein phosphatase PP1-gamma catalytic subunit	P36873	PP1G_HUMAN	PPP1CC
Radix Ophiopogonis	TCMIP104158	Borneol-2-O-β-D-apiofuranosyl(1→6)-β-D-glucopyranoside	0.8182	DB00390	Sodium/potassium-transporting ATPase subunit alpha-1	P05023	AT1A1_HUMAN	ATP1A1
Radix Ophiopogonis	TCMIP104158	Borneol-2-O-β-D-apiofuranosyl(1→6)-β-D-glucopyranoside	0.8235	DB02346	Probable cysteine desulfurase	Q55793	CSD_SYNY3	CSD
Radix Ophiopogonis	TCMIP104158	Borneol-2-O-β-D-apiofuranosyl(1→6)-β-D-glucopyranoside	0.8235	DB03190	Penicillin-binding protein 2X	P59676	PBPX_STRR6	PBPX
Radix Ophiopogonis	TCMIP104158	Borneol-2-O-β-D-apiofuranosyl(1→6)-β-D-glucopyranoside	0.86	DB01998	Alpha-1-antitrypsin	P01009	A1AT_HUMAN	SERPINA1
Radix Ophiopogonis	TCMIP104159	Borneol-2-O-α-L-arabinofuranosyl(1→6)-β-D-glucopyranoside	0.8	DB00390	Sodium/potassium-transporting ATPase subunit alpha-1	P05023	AT1A1_HUMAN	ATP1A1
Radix Ophiopogonis	TCMIP104159	Borneol-2-O-α-L-arabinofuranosyl(1→6)-β-D-glucopyranoside	0.84	DB01998	Alpha-1-antitrypsin	P01009	A1AT_HUMAN	SERPINA1
Radix Ophiopogonis	TCMIP104159	Borneol-2-O-α-L-arabinofuranosyl(1→6)-β-D-glucopyranoside	0.84	DB02346	Probable cysteine desulfurase	Q55793	CSD_SYNY3	CSD
Radix Ophiopogonis	TCMIP104159	Borneol-2-O-α-L-arabinofuranosyl(1→6)-β-D-glucopyranoside	0.84	DB03190	Penicillin-binding protein 2X	P59676	PBPX_STRR6	PBPX
Radix Ophiopogonis	TCMIP104170	Ophiogenin-3-O-α-L-rhamnopyranosyl(1→2)-β-D-glucopyranoside	0.8136	DB01780	14-3-3 protein epsilon	P62258	1433E_HUMAN	YWHAE
Radix Ophiopogonis	TCMIP104170	Ophiogenin-3-O-α-L-rhamnopyranosyl(1→2)-β-D-glucopyranoside	0.8727	DB02169	Serine/threonine-protein phosphatase PP1-gamma catalytic subunit	P36873	PP1G_HUMAN	PPP1CC
Radix Ophiopogonis	TCMIP104170	Ophiogenin-3-O-α-L-rhamnopyranosyl(1→2)-β-D-glucopyranoside	0.8909	DB00390	Sodium/potassium-transporting ATPase subunit alpha-1	P05023	AT1A1_HUMAN	ATP1A1
Radix Ophiopogonis	TCMIP104171	Ophiopogon A	0.8136	DB01780	14-3-3 protein epsilon	P62258	1433E_HUMAN	YWHAE
Radix Ophiopogonis	TCMIP104171	Ophiopogon A	0.8727	DB02169	Serine/threonine-protein phosphatase PP1-gamma catalytic subunit	P36873	PP1G_HUMAN	PPP1CC
Radix Ophiopogonis	TCMIP104171	Ophiopogon A	0.8909	DB00390	Sodium/potassium-transporting ATPase subunit alpha-1	P05023	AT1A1_HUMAN	ATP1A1
Radix Ophiopogonis	TCMIP104178	Ophiopogon B	0.8136	DB01780	14-3-3 protein epsilon	P62258	1433E_HUMAN	YWHAE
Radix Ophiopogonis	TCMIP104178	Ophiopogon B	0.8727	DB02169	Serine/threonine-protein phosphatase PP1-gamma catalytic subunit	P36873	PP1G_HUMAN	PPP1CC
Radix Ophiopogonis	TCMIP104178	Ophiopogon B	0.8909	DB00390	Sodium/potassium-transporting ATPase subunit alpha-1	P05023	AT1A1_HUMAN	ATP1A1
Radix Ophiopogonis	TCMIP104179	Ophiopogonin A	0.8036	DB00288	Annexin A1	P04083	ANXA1_HUMAN	ANXA1
Radix Ophiopogonis	TCMIP104179	Ophiopogonin A	0.8679	DB02169	Serine/threonine-protein phosphatase PP1-gamma catalytic subunit	P36873	PP1G_HUMAN	PPP1CC
Radix Ophiopogonis	TCMIP104179	Ophiopogonin A	0.9231	DB00390	Sodium/potassium-transporting ATPase subunit alpha-1	P05023	AT1A1_HUMAN	ATP1A1
Radix Ophiopogonis	TCMIP104180	Ophiopogonin B	0.8491	DB02169	Serine/threonine-protein phosphatase PP1-gamma catalytic subunit	P36873	PP1G_HUMAN	PPP1CC
Radix Ophiopogonis	TCMIP104180	Ophiopogonin B	0.9038	DB00390	Sodium/potassium-transporting ATPase subunit alpha-1	P05023	AT1A1_HUMAN	ATP1A1
Radix Ophiopogonis	TCMIP104181	Ophiopogonin C'	0.8545	DB02169	Serine/threonine-protein phosphatase PP1-gamma catalytic subunit	P36873	PP1G_HUMAN	PPP1CC
Radix Ophiopogonis	TCMIP104181	Ophiopogonin C'	0.8727	DB00390	Sodium/potassium-transporting ATPase subunit alpha-1	P05023	AT1A1_HUMAN	ATP1A1
Radix Ophiopogonis	TCMIP104182	Ophiopogonin D	0.8103	DB01780	14-3-3 protein epsilon	P62258	1433E_HUMAN	YWHAE
Radix Ophiopogonis	TCMIP104182	Ophiopogonin D	0.8704	DB02169	Serine/threonine-protein phosphatase PP1-gamma catalytic subunit	P36873	PP1G_HUMAN	PPP1CC
Radix Ophiopogonis	TCMIP104182	Ophiopogonin D	0.9245	DB00390	Sodium/potassium-transporting ATPase subunit alpha-1	P05023	AT1A1_HUMAN	ATP1A1
Radix Ophiopogonis	TCMIP104183	Ophiopogonin D'	0.8136	DB01780	14-3-3 protein epsilon	P62258	1433E_HUMAN	YWHAE
Radix Ophiopogonis	TCMIP104183	Ophiopogonin D'	0.8727	DB02169	Serine/threonine-protein phosphatase PP1-gamma catalytic subunit	P36873	PP1G_HUMAN	PPP1CC
Radix Ophiopogonis	TCMIP104183	Ophiopogonin D'	0.8909	DB00390	Sodium/potassium-transporting ATPase subunit alpha-1	P05023	AT1A1_HUMAN	ATP1A1
Radix Ophiopogonis	TCMIP104187	Ruscogenin 1-O-sulfate	0.8	DB01990	Nuclear receptor ROR-alpha	P35398	RORA_HUMAN	RORA
Radix Ophiopogonis	TCMIP106473	glycerol	0.8182	DB01914	Maltose-binding periplasmic protein	P0AEX9	MALE_ECOLI	MALE
Radix Ophiopogonis	TCMIP106473	glycerol	0.8182	DB02399	L-rhamnose isomerase	P32170	RHAA_ECOLI	RHAA
Radix Ophiopogonis	TCMIP106473	glycerol	0.8182	DB03815	L-fucose isomerase	P69923	FUCI_SHIFL	FUCI
Radix Ophiopogonis	TCMIP106473	glycerol	0.85	DB01775	Dihydroxyacetone kinase	P45510	DHAK_CITFR	DHAK
Radix Ophiopogonis	TCMIP106473	glycerol	0.8636	DB01904	Xylose isomerase	P15587	XYLA_STROL	XYLA
Radix Ophiopogonis	TCMIP106473	glycerol	0.9048	DB01638	Malate synthase G	P37330	MASZ_ECOLI	GLCB
Radix Ophiopogonis	TCMIP106473	glycerol	0.9048	DB01638	Xylose isomerase	P12851	XYLA_ACTM4	XYLA
Radix Ophiopogonis	TCMIP106473	glycerol	0.9048	DB01638	Xylose isomerase	P12070	XYLA_ARTS7	XYLA
Radix Ophiopogonis	TCMIP106473	glycerol	1	DB04077	Bacterioferritin	Q93PP9	BFR_DESDA	BFR
Radix Ophiopogonis	TCMIP106473	glycerol	1	DB04077	C4-dicarboxylate transport transcriptional regulatory protein DctD	P13632	DCTD_RHIME	DCTD
Radix Ophiopogonis	TCMIP106473	glycerol	1	DB04077	Enolase	Q8GR70	ENO_ENTHR	ENO
Radix Ophiopogonis	TCMIP106473	glycerol	1	DB04077	Glycerol uptake facilitator protein	P0AER0	GLPF_ECOLI	GLPF
Radix Ophiopogonis	TCMIP106473	glycerol	1	DB04077	Multidrug resistance protein MexA	P52477	MEXA_PSEAE	MEXA
Radix Ophiopogonis	TCMIP106473	glycerol	1	DB04077	DNA mismatch repair protein MutL	P23367	MUTL_ECOLI	MUTL
Radix Ophiopogonis	TCMIP106473	glycerol	1	DB04077	Alpha-N-acetylgalactosaminidase	P17050	NAGAB_HUMAN	NAGA
Radix Ophiopogonis	TCMIP106473	glycerol	1	DB04077	Ribonucleoside-diphosphate reductase 1 subunit beta	P69924	RIR2_ECOLI	NRDB
Radix Ophiopogonis	TCMIP106473	glycerol	1	DB04077	TGF-beta receptor type-2	P37173	TGFR2_HUMAN	TGFBR2
Radix Ophiopogonis	TCMIP106475	pyroglutamic acid	1	DB03088	Angiogenin	P03950	ANGI_HUMAN	ANG
Radix Ophiopogonis	TCMIP106475	pyroglutamic acid	1	DB03088	C-C motif chemokine 8	P80075	CCL8_HUMAN	CCL8
Radix Ophiopogonis	TCMIP106475	pyroglutamic acid	1	DB03088	Cytochrome c2	P00091	CYC22_RHOPA	CYCA
Radix Ophiopogonis	TCMIP106475	pyroglutamic acid	1	DB03088	Ig lambda-1 chain C regions	P0CG04	LAC1_HUMAN	IGLC1
Radix Ophiopogonis	TCMIP106475	pyroglutamic acid	1	DB03088	Dissimilatory copper-containing nitrite reductase	O68601	O68601_ALCXX	NIR
Radix Ophiopogonis	TCMIP106475	pyroglutamic acid	1	DB03088	Orexin	O43612	OREX_HUMAN	HCRT
Radix Ophiopogonis	TCMIP106475	pyroglutamic acid	1	DB03088	Trefoil factor 2	Q03403	TFF2_HUMAN	TFF2
