# Supplementary material for: Deciphering the Pharmacological Mechanism of the Herb Radix Ophiopogonis in the Treatment of Nasopharyngeal Carcinoma by Integrating iTRAQ-Coupled 2-D LC-MS/MS Analysis and Network Investigation
Source: Front Pharmacol. 2019 Mar 18;10:253. doi: 10.3389/fphar.2019.00253 (PMC6431671; doi:10.3389/fphar.2019.00253)
Supplement: TABLE S3 — The interaction data of RO putative targets and NPC known therapeutic targets derived from STRING database. The node 1 and node 2 are RO putative targets and NPC known therapeutic targets. Please refer to STRING database for parameter explainations. [file Table_3.XLSX]

## Sheet: Sheet1
#node1	node2	node1_string_internal_id	node2_string_internal_id	node1_external_id	node2_external_id	neighborhood_on_chromosome	gene_fusion	phylogenetic_cooccurrence	homology	coexpression	experimentally_determined_interaction	database_annotated	automated_textmining	combined_score
POLE	POLE2	1850463	1842589	9606.ENSP00000322570	9606.ENSP00000216367	0	0	0	0	0.683	0.976	0.9	0.928	0.999
MT-CO3	MT-CO2	1854274	1854241	9606.ENSP00000354982	9606.ENSP00000354876	0.309	0	0.526	0	0.961	0.918	0.94	0.908	0.999
POLE4	POLE3	1861462	1856055	9606.ENSP00000420176	9606.ENSP00000363284	0	0	0	0	0.073	0.966	0.9	0.906	0.999
MT-CO3	MT-CO1	1854274	1854132	9606.ENSP00000354982	9606.ENSP00000354499	0.309	0	0.521	0	0.961	0.934	0.94	0.908	0.999
RRM2	RRM1	1854033	1848209	9606.ENSP00000353770	9606.ENSP00000300738	0.309	0	0.526	0	0.97	0.9	0.94	0.976	0.999
RPSA	RPL27	1853012	1844249	9606.ENSP00000346067	9606.ENSP00000253788	0	0	0	0	0.965	0.774	0.9	0.117	0.999
COX5B	COX4I1	1844605	1844229	9606.ENSP00000258424	9606.ENSP00000253452	0	0	0	0	0.866	0.85	0.9	0.796	0.999
PRKAA1	PRKAB1	1853021	1843198	9606.ENSP00000346148	9606.ENSP00000229328	0	0	0	0	0.073	0.946	0.9	0.832	0.999
RPL37A	RPSA	1861343	1853012	9606.ENSP00000418082	9606.ENSP00000346067	0	0	0	0	0.96	0.774	0.9	0.317	0.999
POLE3	POLE	1856055	1850463	9606.ENSP00000363284	9606.ENSP00000322570	0	0	0	0	0.086	0.937	0.9	0.86	0.999
COX5B	COX6B1	1844605	1843826	9606.ENSP00000258424	9606.ENSP00000246554	0	0	0	0	0.985	0.666	0.9	0.588	0.999
CTNNB1	APC	1852818	1844508	9606.ENSP00000344456	9606.ENSP00000257430	0	0	0	0	0.054	0.96	0.9	0.777	0.999
AKT1	PIK3CA	1846136	1845446	9606.ENSP00000270202	9606.ENSP00000263967	0	0	0	0	0.094	0.551	0.9	0.99	0.999
MT-CO2	MT-CO1	1854241	1854132	9606.ENSP00000354876	9606.ENSP00000354499	0.309	0.731	0.522	0	0.961	0.943	0.94	0.957	0.999
COX5A	COX5B	1849982	1844605	9606.ENSP00000317780	9606.ENSP00000258424	0	0	0	0	0.963	0.849	0.9	0.786	0.999
RRM1	RRM2B	1848209	1844085	9606.ENSP00000300738	9606.ENSP00000251810	0.309	0	0.526	0	0.951	0.891	0.94	0.84	0.999
POLA1	POLE	1856974	1850463	9606.ENSP00000368349	9606.ENSP00000322570	0	0	0	0	0.952	0.833	0.9	0.755	0.999
RPL37A	RPL27	1861343	1844249	9606.ENSP00000418082	9606.ENSP00000253788	0	0	0	0	0.971	0.774	0.9	0.343	0.999
COX5A	COX4I1	1849982	1844229	9606.ENSP00000317780	9606.ENSP00000253452	0	0	0	0	0.769	0.803	0.9	0.798	0.998
COX5B	COX7C	1844605	1843871	9606.ENSP00000258424	9606.ENSP00000247655	0	0	0	0	0.922	0.531	0.9	0.696	0.998
PRKAA1	PRKAB2	1853021	1844272	9606.ENSP00000346148	9606.ENSP00000254101	0	0	0	0	0.073	0.946	0.9	0.731	0.998
PTEN	PIK3CA	1855586	1845446	9606.ENSP00000361021	9606.ENSP00000263967	0	0	0	0	0.187	0.319	0.9	0.98	0.998
PTEN	AKT1	1855586	1846136	9606.ENSP00000361021	9606.ENSP00000270202	0	0	0	0	0.085	0.528	0.8	0.983	0.998
POLE4	POLE	1861462	1850463	9606.ENSP00000420176	9606.ENSP00000322570	0	0	0	0	0	0.905	0.9	0.82	0.998
MT-CO2	COX5B	1854241	1844605	9606.ENSP00000354876	9606.ENSP00000258424	0	0	0	0	0.054	0.959	0.9	0.618	0.998
MT-CO2	COX5A	1854241	1849982	9606.ENSP00000354876	9606.ENSP00000317780	0	0	0	0	0.053	0.942	0.9	0.73	0.998
COX5A	COX6B1	1849982	1843826	9606.ENSP00000317780	9606.ENSP00000246554	0	0	0	0	0.882	0.799	0.9	0.549	0.998
POLA1	POLE2	1856974	1842589	9606.ENSP00000368349	9606.ENSP00000216367	0	0	0	0	0.943	0.538	0.9	0.524	0.998
CDKN2A	TP53	1859838	1846083	9606.ENSP00000394932	9606.ENSP00000269305	0	0	0	0	0	0.376	0.9	0.964	0.997
COX6A2	COX5B	1847071	1844605	9606.ENSP00000287490	9606.ENSP00000258424	0	0	0	0	0.95	0.813	0	0.749	0.997
COX5A	COX7C	1849982	1843871	9606.ENSP00000317780	9606.ENSP00000247655	0	0	0	0	0.958	0	0.9	0.446	0.997
RPSA	EEF2	1853012	1849021	9606.ENSP00000346067	9606.ENSP00000307940	0.071	0	0	0	0.954	0.075	0.9	0.366	0.997
POLE3	POLE2	1856055	1842589	9606.ENSP00000363284	9606.ENSP00000216367	0	0	0	0	0.105	0.805	0.9	0.875	0.997
HRAS	PIK3CA	1849235	1845446	9606.ENSP00000309845	9606.ENSP00000263967	0	0	0	0	0.052	0.771	0.9	0.915	0.997
CTNNB1	CDH1	1852818	1844988	9606.ENSP00000344456	9606.ENSP00000261769	0	0	0	0	0.051	0.552	0.9	0.943	0.997
SART1	LSM6	1849296	1847758	9606.ENSP00000310448	9606.ENSP00000296581	0	0	0	0	0.048	0.948	0.9	0.291	0.996
COX6C	COX7C	1847885	1843871	9606.ENSP00000297564	9606.ENSP00000247655	0	0	0	0	0.777	0.445	0.9	0.75	0.996
PTEN	TP53	1855586	1846083	9606.ENSP00000361021	9606.ENSP00000269305	0	0	0	0	0	0.407	0.9	0.942	0.996
COX6C	COX5B	1847885	1844605	9606.ENSP00000297564	9606.ENSP00000258424	0	0	0	0	0.768	0.667	0.9	0.617	0.996
ADA	ADK	1855776	1847021	9606.ENSP00000361965	9606.ENSP00000286621	0	0	0	0	0.054	0.526	0.941	0.866	0.996
POLE4	POLE2	1861462	1842589	9606.ENSP00000420176	9606.ENSP00000216367	0	0	0	0	0.055	0.719	0.9	0.858	0.995
ADA	PNP	1855776	1854141	9606.ENSP00000361965	9606.ENSP00000354532	0.159	0	0	0	0.097	0	0.941	0.912	0.995
MT-CO1	COX5B	1854132	1844605	9606.ENSP00000354499	9606.ENSP00000258424	0	0	0	0	0	0.907	0.9	0.575	0.995
CREB1	AKT1	1859295	1846136	9606.ENSP00000387699	9606.ENSP00000270202	0	0	0	0	0.06	0.36	0.9	0.927	0.995
CTNNB1	AKT1	1852818	1846136	9606.ENSP00000344456	9606.ENSP00000270202	0	0	0	0	0.094	0.376	0.9	0.917	0.994
MT-CO2	COX4I1	1854241	1844229	9606.ENSP00000354876	9606.ENSP00000253452	0	0	0	0	0.054	0.856	0.9	0.637	0.994
MT-CO1	COX4I1	1854132	1844229	9606.ENSP00000354499	9606.ENSP00000253452	0	0	0	0	0.053	0.836	0.9	0.617	0.993
AKT1	TP53	1846136	1846083	9606.ENSP00000270202	9606.ENSP00000269305	0	0	0	0	0.052	0	0.9	0.934	0.993
ARAF	HRAS	1856599	1849235	9606.ENSP00000366244	9606.ENSP00000309845	0	0	0	0	0.05	0.771	0.9	0.746	0.993
HRAS	BRAF	1849235	1847131	9606.ENSP00000309845	9606.ENSP00000288602	0	0	0	0	0.05	0.783	0.9	0.729	0.993
COX7C	COX6B1	1843871	1843826	9606.ENSP00000247655	9606.ENSP00000246554	0	0	0	0	0.82	0.092	0.9	0.649	0.993
PTCH1	SMO	1851463	1843960	9606.ENSP00000332353	9606.ENSP00000249373	0	0	0	0	0.055	0.563	0.9	0.85	0.993
LSM6	SART3	1847758	1843135	9606.ENSP00000296581	9606.ENSP00000228284	0	0	0	0	0.055	0.987	0	0.543	0.993
BRAF	KRAS	1847131	1844404	9606.ENSP00000288602	9606.ENSP00000256078	0	0	0	0	0.101	0.675	0.9	0.792	0.993
BRCA1	TP53	1861387	1846083	9606.ENSP00000418960	9606.ENSP00000269305	0	0	0	0	0	0.36	0.9	0.894	0.992
ARAF	KRAS	1856599	1844404	9606.ENSP00000366244	9606.ENSP00000256078	0	0	0	0	0.05	0.771	0.9	0.702	0.992
VEGFA	PIK3CA	1855611	1845446	9606.ENSP00000361125	9606.ENSP00000263967	0	0	0	0	0	0	0.9	0.915	0.991
BRCA1	RAD51	1861387	1857551	9606.ENSP00000418960	9606.ENSP00000372088	0	0	0	0	0.428	0.36	0.9	0.788	0.991
MT-CO2	COX6B1	1854241	1843826	9606.ENSP00000354876	9606.ENSP00000246554	0	0	0	0	0.122	0.786	0.9	0.614	0.991
RAD51	MLH1	1857551	1843304	9606.ENSP00000372088	9606.ENSP00000231790	0.066	0	0	0	0.126	0.504	0.9	0.802	0.99
COX8A	COX5B	1850328	1844605	9606.ENSP00000321260	9606.ENSP00000258424	0	0	0	0	0.786	0	0.9	0.601	0.99
COX6C	COX6B1	1847885	1843826	9606.ENSP00000297564	9606.ENSP00000246554	0	0	0	0	0.619	0.41	0.9	0.602	0.989
MT-CO1	COX5A	1854132	1849982	9606.ENSP00000354499	9606.ENSP00000317780	0	0	0	0	0	0.735	0.9	0.643	0.989
CREB1	PIK3CA	1859295	1845446	9606.ENSP00000387699	9606.ENSP00000263967	0	0	0	0	0.18	0	0.9	0.875	0.988
PIK3CA	KRAS	1845446	1844404	9606.ENSP00000263967	9606.ENSP00000256078	0	0	0	0	0.096	0.879	0	0.896	0.987
BAG1	HSPA8	1861489	1843112	9606.ENSP00000420514	9606.ENSP00000227378	0	0	0	0	0.053	0.41	0.9	0.799	0.987
COX4I1	COX7C	1844229	1843871	9606.ENSP00000253452	9606.ENSP00000247655	0	0	0	0	0.474	0.445	0.9	0.609	0.987
COX6C	COX4I1	1847885	1844229	9606.ENSP00000297564	9606.ENSP00000253452	0	0	0	0	0.431	0.667	0.9	0.397	0.987
STK11	TP53	1850687	1846083	9606.ENSP00000324856	9606.ENSP00000269305	0	0	0	0	0	0.374	0.9	0.805	0.986
FAS	TP53	1853242	1846083	9606.ENSP00000347979	9606.ENSP00000269305	0	0	0	0	0.054	0	0.9	0.865	0.986
COX6A2	COX7C	1847071	1843871	9606.ENSP00000287490	9606.ENSP00000247655	0	0	0	0	0.949	0.445	0	0.525	0.985
TKT	ALDOA	1860530	1851945	9606.ENSP00000405455	9606.ENSP00000336927	0.309	0	0	0	0.144	0.417	0.941	0.393	0.985
TP53	MLH1	1846083	1843304	9606.ENSP00000269305	9606.ENSP00000231790	0	0	0	0	0	0	0.9	0.847	0.984
APAF1	TP53	1862487	1846083	9606.ENSP00000448165	9606.ENSP00000269305	0	0	0	0	0	0	0.9	0.854	0.984
STK11	PRKAB1	1850687	1843198	9606.ENSP00000324856	9606.ENSP00000229328	0	0	0	0	0.059	0.471	0.9	0.717	0.984
ACVR1B	SMAD4	1862229	1852473	9606.ENSP00000442656	9606.ENSP00000341551	0	0	0	0	0.063	0.434	0.9	0.746	0.984
MET	CDH1	1849944	1844988	9606.ENSP00000317272	9606.ENSP00000261769	0	0	0	0	0.049	0.376	0.9	0.774	0.984
RAD51	ABL1	1857551	1855665	9606.ENSP00000372088	9606.ENSP00000361423	0.055	0	0	0	0.055	0.446	0.9	0.716	0.983
POLE4	POLA1	1861462	1856974	9606.ENSP00000420176	9606.ENSP00000368349	0	0	0	0	0.05	0.833	0.9	0.092	0.983
DPH5	EEF2	1855178	1849021	9606.ENSP00000359127	9606.ENSP00000307940	0	0	0	0	0.12	0.166	0.9	0.795	0.982
CREB1	VEGFA	1859295	1855611	9606.ENSP00000387699	9606.ENSP00000361125	0	0	0	0	0	0.36	0.9	0.75	0.982
TKT	FBP1	1860530	1856276	9606.ENSP00000405455	9606.ENSP00000364475	0.309	0	0	0	0.099	0	0.941	0.569	0.982
COX7B	COX5B	1861313	1844605	9606.ENSP00000417656	9606.ENSP00000258424	0	0	0	0	0.309	0.445	0.9	0.607	0.982
MT-CO2	COX7C	1854241	1843871	9606.ENSP00000354876	9606.ENSP00000247655	0	0	0	0	0	0.798	0.9	0.141	0.981
MT-CO3	COX5B	1854274	1844605	9606.ENSP00000354982	9606.ENSP00000258424	0	0	0	0	0	0.675	0.9	0.478	0.981
ABL1	CTNNB1	1855665	1852818	9606.ENSP00000361423	9606.ENSP00000344456	0	0	0	0	0.057	0.505	0.9	0.648	0.981
VEGFA	VHL	1855611	1844441	9606.ENSP00000361125	9606.ENSP00000256474	0	0	0	0	0	0	0.9	0.827	0.981
COX5A	COX6C	1849982	1847885	9606.ENSP00000317780	9606.ENSP00000297564	0	0	0	0	0.601	0.134	0.9	0.502	0.98
TP53	RRM2B	1846083	1844085	9606.ENSP00000269305	9606.ENSP00000251810	0	0	0	0	0	0.344	0.9	0.723	0.98
PIK3CA	CDH1	1845446	1844988	9606.ENSP00000263967	9606.ENSP00000261769	0	0	0	0	0.044	0	0.9	0.814	0.98
CREB1	CRTC1	1859295	1852882	9606.ENSP00000387699	9606.ENSP00000345001	0	0	0	0	0.051	0.187	0.9	0.778	0.98
SETD7	TP53	1846356	1846083	9606.ENSP00000274031	9606.ENSP00000269305	0	0	0	0	0.054	0.378	0.9	0.684	0.979
SIRT3	ACSS1	1857564	1849917	9606.ENSP00000372191	9606.ENSP00000316924	0	0	0	0	0	0.362	0.9	0.701	0.979
CDKN2A	ABL1	1859838	1855665	9606.ENSP00000394932	9606.ENSP00000361423	0.048	0	0	0	0.054	0.17	0.9	0.764	0.979
MT-CO3	COX4I1	1854274	1844229	9606.ENSP00000354982	9606.ENSP00000253452	0	0	0	0	0	0.667	0.9	0.431	0.979
MT-CO2	COX6C	1854241	1847885	9606.ENSP00000354876	9606.ENSP00000297564	0	0	0	0	0.056	0.791	0.9	0.096	0.979
POLA1	RRM1	1856974	1848209	9606.ENSP00000368349	9606.ENSP00000300738	0	0	0	0	0.955	0.054	0	0.542	0.978
EEF2	RPL27	1849021	1844249	9606.ENSP00000307940	9606.ENSP00000253788	0	0	0	0	0.758	0	0.9	0.151	0.977
RPL41	RPL27	1861501	1844249	9606.ENSP00000420821	9606.ENSP00000253788	0	0	0	0	0.741	0	0.9	0.205	0.977
SMAD4	CDH1	1852473	1844988	9606.ENSP00000341551	9606.ENSP00000261769	0	0	0	0	0.042	0	0.9	0.774	0.976
TGFBR2	SMAD4	1853779	1852473	9606.ENSP00000351905	9606.ENSP00000341551	0	0	0	0	0.057	0.308	0.9	0.684	0.976
FBP1	ALDOA	1856276	1851945	9606.ENSP00000364475	9606.ENSP00000336927	0	0	0	0	0.126	0	0.942	0.556	0.975
MT-CO1	COX7C	1854132	1843871	9606.ENSP00000354499	9606.ENSP00000247655	0	0	0	0	0	0.741	0.9	0.112	0.975
COX8A	COX6B1	1850328	1843826	9606.ENSP00000321260	9606.ENSP00000246554	0	0	0	0	0.677	0	0.9	0.295	0.975
PNP	ADK	1854141	1847021	9606.ENSP00000354532	9606.ENSP00000286621	0.113	0	0	0	0.054	0.046	0.9	0.743	0.975
COX8A	COX5A	1850328	1849982	9606.ENSP00000321260	9606.ENSP00000317780	0	0	0	0	0.451	0	0.9	0.575	0.974
PBRM1	ARID1A	1858233	1850249	9606.ENSP00000378307	9606.ENSP00000320485	0	0	0	0	0.185	0.379	0.9	0.532	0.973
APAF1	AKT1	1862487	1846136	9606.ENSP00000448165	9606.ENSP00000270202	0	0	0	0	0.055	0.044	0.9	0.742	0.973
RET	PIK3CA	1853238	1845446	9606.ENSP00000347942	9606.ENSP00000263967	0	0	0	0	0.055	0.11	0.9	0.718	0.973
SMAD4	STK11	1852473	1850687	9606.ENSP00000341551	9606.ENSP00000324856	0	0	0	0	0.052	0.054	0.9	0.742	0.973
TP53	ABCB1	1846083	1845794	9606.ENSP00000269305	9606.ENSP00000265724	0	0	0	0	0	0	0.9	0.741	0.972
COX4I1	COX6B1	1844229	1843826	9606.ENSP00000253452	9606.ENSP00000246554	0	0	0	0	0.528	0.074	0.9	0.435	0.972
MT-CO3	COX5A	1854274	1849982	9606.ENSP00000354982	9606.ENSP00000317780	0	0	0	0	0	0.182	0.9	0.694	0.972
CTNNB1	SMAD4	1852818	1852473	9606.ENSP00000344456	9606.ENSP00000341551	0	0	0	0	0.073	0.324	0.9	0.583	0.97
COX7B	COX6C	1861313	1847885	9606.ENSP00000417656	9606.ENSP00000297564	0	0	0	0	0.107	0.445	0.9	0.469	0.97
CDKN2A	PIK3CA	1859838	1845446	9606.ENSP00000394932	9606.ENSP00000263967	0	0	0	0	0.056	0.145	0.9	0.679	0.97
MET	PIK3CA	1849944	1845446	9606.ENSP00000317272	9606.ENSP00000263967	0	0	0	0	0.055	0.11	0.9	0.689	0.97
RPL41	RPL37A	1861501	1861343	9606.ENSP00000420821	9606.ENSP00000418082	0	0	0	0	0.582	0	0.9	0.342	0.97
ACVRL1	TGFBR2	1857773	1853779	9606.ENSP00000373574	9606.ENSP00000351905	0	0	0	0.77	0.066	0.677	0.9	0.459	0.97
CTNNB1	MET	1852818	1849944	9606.ENSP00000344456	9606.ENSP00000317272	0	0	0	0	0.054	0.446	0.9	0.489	0.969
SERPINB4	SERPINB3	1852698	1846868	9606.ENSP00000343445	9606.ENSP00000283752	0	0	0.527	0.987	0.863	0.774	0	0.86	0.968
CTNNB1	PIK3CA	1852818	1845446	9606.ENSP00000344456	9606.ENSP00000263967	0	0	0	0	0.064	0.054	0.9	0.677	0.967
AKT1	CAT	1846136	1843587	9606.ENSP00000270202	9606.ENSP00000241052	0	0	0	0	0	0.082	0.9	0.676	0.967
MT-CO3	COX6C	1854274	1847885	9606.ENSP00000354982	9606.ENSP00000297564	0	0	0	0	0	0.667	0.9	0.104	0.967
STK11	PRKAB2	1850687	1844272	9606.ENSP00000324856	9606.ENSP00000254101	0	0	0	0	0.059	0.471	0.9	0.429	0.967
COX8A	COX4I1	1850328	1844229	9606.ENSP00000321260	9606.ENSP00000253452	0	0	0	0	0.294	0	0.9	0.577	0.967
HRAS	TP53	1849235	1846083	9606.ENSP00000309845	9606.ENSP00000269305	0	0	0	0	0	0.325	0	0.952	0.966
VEGFA	MET	1855611	1849944	9606.ENSP00000361125	9606.ENSP00000317272	0	0	0	0	0	0.098	0.8	0.83	0.966
RET	HRAS	1853238	1849235	9606.ENSP00000347942	9606.ENSP00000309845	0	0	0	0	0.046	0.18	0.9	0.623	0.966
COX7B	COX5A	1861313	1849982	9606.ENSP00000417656	9606.ENSP00000317780	0	0	0	0	0.341	0	0.9	0.514	0.965
MET	TP53	1849944	1846083	9606.ENSP00000317272	9606.ENSP00000269305	0	0	0	0	0	0.063	0.9	0.658	0.965
MET	HRAS	1849944	1849235	9606.ENSP00000317272	9606.ENSP00000309845	0	0	0	0	0.046	0.17	0.9	0.614	0.965
KIAA0101	POLE2	1848123	1842589	9606.ENSP00000300035	9606.ENSP00000216367	0	0	0	0	0.658	0	0.9	0.068	0.965
AK2	NME1	1853107	1842174	9606.ENSP00000346921	9606.ENSP00000013034	0	0	0	0	0.213	0	0.941	0.296	0.964
CDKN2A	SMAD4	1859838	1852473	9606.ENSP00000394932	9606.ENSP00000341551	0	0	0	0	0	0	0.9	0.646	0.963
PRKAA1	TP53	1853021	1846083	9606.ENSP00000346148	9606.ENSP00000269305	0	0	0	0	0	0.173	0.9	0.593	0.963
COX7B	COX7C	1861313	1843871	9606.ENSP00000417656	9606.ENSP00000247655	0	0	0	0	0.154	0.296	0.9	0.451	0.962
DIEXF	NOC2L	1861391	1850000	9606.ENSP00000419005	9606.ENSP00000317992	0	0	0	0	0.952	0	0	0.253	0.962
MT-CO1	COX6C	1854132	1847885	9606.ENSP00000354499	9606.ENSP00000297564	0	0	0	0	0	0.612	0.9	0.118	0.962
AK8	ADK	1847970	1847021	9606.ENSP00000298545	9606.ENSP00000286621	0.048	0	0	0	0.125	0	0.9	0.598	0.962
MT-CO3	COX6B1	1854274	1843826	9606.ENSP00000354982	9606.ENSP00000246554	0	0	0	0	0.192	0.094	0.9	0.536	0.961
RRM2	NME1	1854033	1842174	9606.ENSP00000353770	9606.ENSP00000013034	0	0	0	0	0.288	0	0.941	0.158	0.961
VEGFA	AKT1	1855611	1846136	9606.ENSP00000361125	9606.ENSP00000270202	0	0	0	0	0	0.344	0	0.943	0.961
COX7B	COX4I1	1861313	1844229	9606.ENSP00000417656	9606.ENSP00000253452	0	0	0	0	0.155	0.445	0.9	0.263	0.96
BRCA1	ABL1	1861387	1855665	9606.ENSP00000418960	9606.ENSP00000361423	0	0	0	0	0.042	0.36	0.9	0.437	0.96
PRKAA1	STK11	1853021	1850687	9606.ENSP00000346148	9606.ENSP00000324856	0	0	0.376	0.742	0.06	0.451	0.9	0.898	0.96
POLA1	POLE3	1856974	1856055	9606.ENSP00000368349	9606.ENSP00000363284	0	0	0	0	0.113	0.526	0.9	0.145	0.959
HRAS	LGALS3	1849235	1844285	9606.ENSP00000309845	9606.ENSP00000254301	0	0	0	0	0.044	0	0.9	0.612	0.959
FGFR3	HRAS	1852258	1849235	9606.ENSP00000339824	9606.ENSP00000309845	0	0	0	0	0.046	0.18	0.9	0.538	0.959
RET	KRAS	1853238	1844404	9606.ENSP00000347942	9606.ENSP00000256078	0	0	0	0	0.046	0.18	0.9	0.53	0.958
RAD51	POLE	1857551	1850463	9606.ENSP00000372088	9606.ENSP00000322570	0	0	0	0	0.129	0.183	0.9	0.491	0.958
AK8	NME1	1847970	1842174	9606.ENSP00000298545	9606.ENSP00000013034	0	0	0	0	0.093	0	0.941	0.294	0.958
AK2	RRM1	1853107	1848209	9606.ENSP00000346921	9606.ENSP00000300738	0	0	0	0	0.12	0	0.941	0.255	0.958
ACVR1	AMHR2	1845380	1844545	9606.ENSP00000263640	9606.ENSP00000257863	0	0	0	0.719	0.066	0.497	0.9	0.676	0.958
AK1	RRM1	1855840	1848209	9606.ENSP00000362249	9606.ENSP00000300738	0	0	0	0	0.072	0	0.941	0.283	0.957
RRM1	NME1	1848209	1842174	9606.ENSP00000300738	9606.ENSP00000013034	0	0	0	0	0.186	0	0.941	0.183	0.957
AK1	NME1	1855840	1842174	9606.ENSP00000362249	9606.ENSP00000013034	0	0	0	0	0.093	0	0.941	0.271	0.957
PRMT1	TP53	1860583	1846083	9606.ENSP00000406162	9606.ENSP00000269305	0	0	0	0	0.11	0.36	0.9	0.331	0.956
AK2	ADK	1853107	1847021	9606.ENSP00000346921	9606.ENSP00000286621	0.048	0	0	0	0.125	0	0.9	0.537	0.956
COX8A	COX7C	1850328	1843871	9606.ENSP00000321260	9606.ENSP00000247655	0	0	0	0	0.35	0	0.9	0.376	0.955
MT-CO1	COX6B1	1854132	1843826	9606.ENSP00000354499	9606.ENSP00000246554	0	0	0	0	0	0.081	0.9	0.554	0.955
RRM1	AK8	1848209	1847970	9606.ENSP00000300738	9606.ENSP00000298545	0	0	0	0	0.072	0	0.941	0.255	0.955
FGFR3	PIK3CA	1852258	1845446	9606.ENSP00000339824	9606.ENSP00000263967	0	0	0	0	0.055	0.11	0.9	0.518	0.954
FHL2	TP53	1850494	1846083	9606.ENSP00000322909	9606.ENSP00000269305	0	0	0	0	0	0	0.9	0.559	0.954
PHF20	TP53	1856030	1846083	9606.ENSP00000363124	9606.ENSP00000269305	0	0	0	0	0	0.36	0.9	0.351	0.954
TGFBR2	CTNNB1	1853779	1852818	9606.ENSP00000351905	9606.ENSP00000344456	0	0	0	0	0.053	0.324	0.9	0.356	0.953
RRM2	RRM2B	1854033	1844085	9606.ENSP00000353770	9606.ENSP00000251810	0	0	0.527	0.984	0	0.774	0.8	0.575	0.953
MT-CO3	COX7C	1854274	1843871	9606.ENSP00000354982	9606.ENSP00000247655	0	0	0	0	0	0.539	0.9	0.08	0.953
ADRBK2	ADRBK1	1849968	1849510	9606.ENSP00000317578	9606.ENSP00000312262	0	0	0	0.987	0	0.774	0.8	0.871	0.953
TP53	PRKAB1	1846083	1843198	9606.ENSP00000269305	9606.ENSP00000229328	0	0	0	0	0	0	0.9	0.543	0.952
RRM2	AK2	1854033	1853107	9606.ENSP00000353770	9606.ENSP00000346921	0	0	0	0	0.095	0	0.941	0.173	0.952
POLE	POLB	1850463	1845748	9606.ENSP00000322570	9606.ENSP00000265421	0	0	0	0	0.073	0.118	0.9	0.48	0.951
AK1	RRM2B	1855840	1844085	9606.ENSP00000362249	9606.ENSP00000251810	0	0	0	0	0.065	0	0.941	0.186	0.951
UBAP1	VPS37A	1862169	1850062	9606.ENSP00000441024	9606.ENSP00000318629	0	0	0	0	0	0.344	0.9	0.319	0.951
AK1	RRM2	1855840	1854033	9606.ENSP00000362249	9606.ENSP00000353770	0	0	0	0	0.065	0	0.941	0.19	0.951
VDR	TP53	1862386	1846083	9606.ENSP00000447173	9606.ENSP00000269305	0	0	0	0	0.053	0.192	0.9	0.443	0.951
ARAF	BRAF	1856599	1847131	9606.ENSP00000366244	9606.ENSP00000288602	0	0	0	0.963	0.052	0.525	0.9	0.411	0.951
TP53	YWHAE	1846083	1845524	9606.ENSP00000269305	9606.ENSP00000264335	0	0	0	0	0.086	0.36	0.9	0.247	0.95
RRM2B	NME1	1844085	1842174	9606.ENSP00000251810	9606.ENSP00000013034	0	0	0	0	0.12	0	0.941	0.096	0.949
BRCA1	BAP1	1861387	1861267	9606.ENSP00000418960	9606.ENSP00000417132	0	0	0	0	0	0.36	0.9	0.28	0.949
AK2	RRM2B	1853107	1844085	9606.ENSP00000346921	9606.ENSP00000251810	0	0	0	0	0.055	0	0.941	0.168	0.949
AK8	RRM2B	1847970	1844085	9606.ENSP00000298545	9606.ENSP00000251810	0	0	0	0	0.055	0	0.941	0.154	0.948
COX7B	MT-CO2	1861313	1854241	9606.ENSP00000417656	9606.ENSP00000354876	0	0	0	0	0.054	0.445	0.9	0.127	0.948
RRM2	AK8	1854033	1847970	9606.ENSP00000353770	9606.ENSP00000298545	0	0	0	0	0.055	0	0.941	0.157	0.948
CTNNB1	HNF1A	1852818	1844515	9606.ENSP00000344456	9606.ENSP00000257555	0	0	0	0	0	0.343	0.9	0.27	0.947
CDC73	CTNNB1	1854592	1852818	9606.ENSP00000356405	9606.ENSP00000344456	0	0	0	0	0.094	0.359	0.9	0.206	0.947
COX7B	MT-CO3	1861313	1854274	9606.ENSP00000417656	9606.ENSP00000354982	0	0	0	0	0	0.445	0.9	0.132	0.947
FGFR3	KRAS	1852258	1844404	9606.ENSP00000339824	9606.ENSP00000256078	0	0	0	0	0.046	0.18	0.9	0.403	0.947
ADCY1	PRKAR2B	1847854	1845791	9606.ENSP00000297323	9606.ENSP00000265717	0.073	0	0	0	0.119	0.183	0.9	0.334	0.947
BCAS2	LSM6	1855053	1847758	9606.ENSP00000358554	9606.ENSP00000296581	0	0	0	0	0.244	0.176	0.9	0.22	0.945
COX7B	COX6B1	1861313	1843826	9606.ENSP00000417656	9606.ENSP00000246554	0	0	0	0	0.326	0	0.9	0.262	0.945
RPL37A	EEF2	1861343	1849021	9606.ENSP00000418082	9606.ENSP00000307940	0.101	0	0	0	0.248	0	0.9	0.272	0.944
FBP1	PFKFB4	1856276	1843311	9606.ENSP00000364475	9606.ENSP00000232375	0	0	0	0	0.1	0	0.9	0.432	0.944
RET	CTNNB1	1853238	1852818	9606.ENSP00000347942	9606.ENSP00000344456	0	0	0	0	0	0.17	0.9	0.362	0.942
RAD51	POLE2	1857551	1842589	9606.ENSP00000372088	9606.ENSP00000216367	0	0	0	0	0.408	0	0.9	0.11	0.942
COX7B	MT-CO1	1861313	1854132	9606.ENSP00000417656	9606.ENSP00000354499	0	0	0	0	0	0.445	0.9	0.05	0.942
NOC2L	TP53	1850000	1846083	9606.ENSP00000317992	9606.ENSP00000269305	0	0	0	0	0	0.336	0.9	0.185	0.941
VEGFA	TP53	1855611	1846083	9606.ENSP00000361125	9606.ENSP00000269305	0	0	0	0	0	0	0	0.941	0.941
COX6A2	COX4I1	1847071	1844229	9606.ENSP00000287490	9606.ENSP00000253452	0	0	0	0	0.456	0.612	0.36	0.615	0.941
AK1	ADK	1855840	1847021	9606.ENSP00000362249	9606.ENSP00000286621	0.048	0	0	0	0.056	0	0.9	0.428	0.941
AKT1	YWHAE	1846136	1845524	9606.ENSP00000270202	9606.ENSP00000264335	0	0	0	0	0.088	0.244	0.9	0.255	0.941
TXNDC5	HSPA8	1857091	1843112	9606.ENSP00000369081	9606.ENSP00000227378	0.048	0	0	0	0.1	0.14	0.9	0.332	0.941
MST1R	AKT1	1847736	1846136	9606.ENSP00000296474	9606.ENSP00000270202	0	0	0	0.619	0.047	0.336	0.9	0.37	0.94
COX7B	COX8A	1861313	1850328	9606.ENSP00000417656	9606.ENSP00000321260	0	0	0	0	0.277	0	0.9	0.243	0.94
EPHB2	ABL1	1856154	1855665	9606.ENSP00000363763	9606.ENSP00000361423	0	0	0	0.665	0.073	0.644	0.8	0.503	0.939
BCAS2	HSPA8	1855053	1843112	9606.ENSP00000358554	9606.ENSP00000227378	0	0	0	0	0.053	0.359	0.9	0.11	0.938
BRCA1	POLE2	1861387	1842589	9606.ENSP00000418960	9606.ENSP00000216367	0	0	0	0	0.36	0	0.9	0.098	0.937
ADRBK1	SMO	1849510	1843960	9606.ENSP00000312262	9606.ENSP00000249373	0	0	0	0	0.044	0	0.9	0.392	0.936
ABL2	ABL1	1861715	1855665	9606.ENSP00000427562	9606.ENSP00000361423	0	0	0	0.933	0	0.36	0.9	0.658	0.936
COX8A	COX6C	1850328	1847885	9606.ENSP00000321260	9606.ENSP00000297564	0	0	0	0	0.188	0	0.9	0.277	0.936
CTNNB1	SALL4	1852818	1842636	9606.ENSP00000344456	9606.ENSP00000217086	0	0	0	0	0	0.292	0.9	0.179	0.936
CCT3	TP53	1847605	1846083	9606.ENSP00000295688	9606.ENSP00000269305	0	0	0	0	0.074	0.133	0.9	0.288	0.935
BRAF	YWHAE	1847131	1845524	9606.ENSP00000288602	9606.ENSP00000264335	0	0	0	0	0.054	0.37	0.9	0	0.935
EPHB2	HRAS	1856154	1849235	9606.ENSP00000363763	9606.ENSP00000309845	0	0	0	0	0.055	0.17	0.9	0.259	0.934
PRKAB2	PRKAB1	1844272	1843198	9606.ENSP00000254101	9606.ENSP00000229328	0	0	0	0.977	0	0.354	0.9	0.819	0.933
DNMT1	AHCY	1853859	1842666	9606.ENSP00000352516	9606.ENSP00000217426	0.055	0	0	0	0	0	0.9	0.344	0.932
VEGFA	SERPINA1	1855611	1853254	9606.ENSP00000361125	9606.ENSP00000348068	0	0	0	0	0	0	0.9	0.343	0.931
PIM1	HRAS	1855921	1849235	9606.ENSP00000362608	9606.ENSP00000309845	0	0	0	0	0.059	0.17	0.9	0.228	0.931
RPL41	RPSA	1861501	1853012	9606.ENSP00000420821	9606.ENSP00000346067	0	0	0	0	0.28	0	0.9	0.116	0.93
MST1R	YWHAE	1847736	1845524	9606.ENSP00000296474	9606.ENSP00000264335	0	0	0	0	0	0.336	0.9	0	0.93
EPHB2	PIK3CA	1856154	1845446	9606.ENSP00000363763	9606.ENSP00000263967	0	0	0	0	0.055	0.11	0.9	0.26	0.929
TP53	KRAS	1846083	1844404	9606.ENSP00000269305	9606.ENSP00000256078	0	0	0	0	0	0	0	0.927	0.928
ADA	NT5C2	1855776	1852221	9606.ENSP00000361965	9606.ENSP00000339479	0	0	0	0	0.071	0	0.913	0.183	0.928
PNP	NT5C2	1854141	1852221	9606.ENSP00000354532	9606.ENSP00000339479	0	0	0	0	0.053	0	0.913	0.181	0.927
RET	CDH1	1853238	1844988	9606.ENSP00000347942	9606.ENSP00000261769	0	0	0	0	0	0.046	0.9	0.305	0.927
IL10	SMAD4	1860958	1852473	9606.ENSP00000412237	9606.ENSP00000341551	0	0	0	0	0	0	0.9	0.304	0.927
TP53	APC	1846083	1844508	9606.ENSP00000269305	9606.ENSP00000257430	0	0	0	0	0	0	0.9	0.307	0.927
HRAS	YWHAE	1849235	1845524	9606.ENSP00000309845	9606.ENSP00000264335	0	0	0	0	0.055	0.184	0.9	0.138	0.924
DCTD	NT5C2	1853462	1852221	9606.ENSP00000349576	9606.ENSP00000339479	0	0	0	0	0	0	0.9	0.277	0.924
CTNNB1	ID2	1852818	1843383	9606.ENSP00000344456	9606.ENSP00000234091	0	0	0	0	0.054	0	0.9	0.259	0.923
CREB1	PRKAR2B	1859295	1845791	9606.ENSP00000387699	9606.ENSP00000265717	0	0	0	0	0.053	0	0.9	0.249	0.922
VDR	SMAD4	1862386	1852473	9606.ENSP00000447173	9606.ENSP00000341551	0	0	0	0	0	0.046	0.9	0.241	0.921
NDE1	YWHAE	1852988	1845524	9606.ENSP00000345892	9606.ENSP00000264335	0	0	0	0	0.052	0.097	0.9	0.194	0.921
VEGFA	ALDOA	1855611	1851945	9606.ENSP00000361125	9606.ENSP00000336927	0	0	0	0	0	0	0.9	0.237	0.92
CREB1	RET	1859295	1853238	9606.ENSP00000387699	9606.ENSP00000347942	0	0	0	0	0	0	0.9	0.233	0.92
MC2R	TSHR	1851632	1847934	9606.ENSP00000333821	9606.ENSP00000298171	0	0	0	0	0.054	0	0.9	0.223	0.92
PIK3CA	ANXA1	1845446	1844509	9606.ENSP00000263967	9606.ENSP00000257497	0	0	0	0	0	0	0.9	0.241	0.92
AKT1	SMO	1846136	1843960	9606.ENSP00000270202	9606.ENSP00000249373	0	0	0	0	0.053	0.062	0.9	0.202	0.919
KIF2C	PPP1CC	1855643	1851808	9606.ENSP00000361298	9606.ENSP00000335084	0	0	0	0	0.056	0.17	0.9	0.089	0.919
CTNNB1	YWHAE	1852818	1845524	9606.ENSP00000344456	9606.ENSP00000264335	0	0	0	0	0.053	0.06	0.9	0.199	0.919
ABL1	TP53	1855665	1846083	9606.ENSP00000361423	9606.ENSP00000269305	0	0	0	0	0	0.374	0	0.876	0.919
POLE4	RAD51	1861462	1857551	9606.ENSP00000420176	9606.ENSP00000372088	0	0	0	0	0.071	0	0.9	0.187	0.917
HRAS	ADCY1	1849235	1847854	9606.ENSP00000309845	9606.ENSP00000297323	0	0	0	0	0	0.095	0.9	0.161	0.917
CDKN2A	HRAS	1859838	1849235	9606.ENSP00000394932	9606.ENSP00000309845	0	0	0	0	0.049	0.193	0	0.9	0.917
TGFBR2	PPP1CC	1853779	1851808	9606.ENSP00000351905	9606.ENSP00000335084	0	0	0	0	0.047	0.169	0.9	0.061	0.915
HCRT	PIK3CA	1847406	1845446	9606.ENSP00000293330	9606.ENSP00000263967	0	0	0	0	0	0	0.9	0.18	0.914
BRCA1	POLE	1861387	1850463	9606.ENSP00000418960	9606.ENSP00000322570	0	0	0	0	0.054	0	0.9	0.169	0.914
DIEXF	RPSA	1861391	1853012	9606.ENSP00000419005	9606.ENSP00000346067	0	0	0	0	0.072	0	0.9	0.152	0.914
MT-CO1	COX8A	1854132	1850328	9606.ENSP00000354499	9606.ENSP00000321260	0	0	0	0	0	0	0.9	0.177	0.914
POLE	KIAA0101	1850463	1848123	9606.ENSP00000322570	9606.ENSP00000300035	0	0	0	0	0.129	0	0.9	0.091	0.913
POLA1	NME1	1856974	1842174	9606.ENSP00000368349	9606.ENSP00000013034	0	0	0	0	0.055	0	0.9	0.161	0.913
NT5C2	ADK	1852221	1847021	9606.ENSP00000339479	9606.ENSP00000286621	0	0	0	0	0.072	0	0.9	0.142	0.913
MUC16	ST3GAL1	1858543	1850052	9606.ENSP00000381008	9606.ENSP00000318445	0	0	0	0	0	0	0.9	0.174	0.913
CTNNB1	TFF2	1852818	1847286	9606.ENSP00000344456	9606.ENSP00000291526	0	0	0	0	0	0	0.9	0.161	0.912
POLE	NME1	1850463	1842174	9606.ENSP00000322570	9606.ENSP00000013034	0	0	0	0	0.055	0	0.9	0.145	0.912
RPL41	EEF2	1861501	1849021	9606.ENSP00000420821	9606.ENSP00000307940	0	0	0	0	0	0	0.9	0.161	0.912
PRKAR2B	YWHAE	1845791	1845524	9606.ENSP00000265717	9606.ENSP00000264335	0	0	0	0	0.062	0.065	0.9	0.11	0.911
SMAD4	HNF1A	1852473	1844515	9606.ENSP00000341551	9606.ENSP00000257555	0	0	0	0	0	0	0.9	0.152	0.911
COX5A	COX6A2	1849982	1847071	9606.ENSP00000317780	9606.ENSP00000287490	0	0	0	0	0.667	0.134	0.36	0.571	0.91
TP53	PRKAB2	1846083	1844272	9606.ENSP00000269305	9606.ENSP00000254101	0	0	0	0	0	0.135	0.9	0.046	0.91
MT-CO2	COX8A	1854241	1850328	9606.ENSP00000354876	9606.ENSP00000321260	0	0	0	0	0.053	0	0.9	0.131	0.91
SERPINA1	ALDOA	1853254	1851945	9606.ENSP00000348068	9606.ENSP00000336927	0	0	0	0	0.053	0	0.9	0.133	0.91
MC2R	ADCY1	1851632	1847854	9606.ENSP00000333821	9606.ENSP00000297323	0	0	0	0	0	0	0.9	0.142	0.91
PTEN	STK11	1855586	1850687	9606.ENSP00000361021	9606.ENSP00000324856	0	0	0	0	0	0.446	0	0.842	0.909
POLE2	NME1	1842589	1842174	9606.ENSP00000216367	9606.ENSP00000013034	0	0	0	0	0.133	0	0.9	0	0.909
TP53	CDH1	1846083	1844988	9606.ENSP00000269305	9606.ENSP00000261769	0	0	0	0	0	0	0	0.909	0.909
POLE3	NME1	1856055	1842174	9606.ENSP00000363284	9606.ENSP00000013034	0	0	0	0	0.127	0	0.9	0	0.909
AK1	NT5C2	1855840	1852221	9606.ENSP00000362249	9606.ENSP00000339479	0	0	0	0	0.042	0	0.9	0.123	0.908
MT-CO2	CTNNB1	1854241	1852818	9606.ENSP00000354876	9606.ENSP00000344456	0	0	0	0	0.06	0	0.9	0.1	0.908
MT-CO3	COX8A	1854274	1850328	9606.ENSP00000354982	9606.ENSP00000321260	0	0	0	0	0	0	0.9	0.119	0.908
SMAD4	HSPA8	1852473	1843112	9606.ENSP00000341551	9606.ENSP00000227378	0	0	0	0	0	0	0.9	0.114	0.907
NDE1	PPP1CC	1852988	1851808	9606.ENSP00000345892	9606.ENSP00000335084	0	0	0	0	0.101	0	0.9	0.05	0.907
AK2	PDE4B	1853107	1851429	9606.ENSP00000346921	9606.ENSP00000332116	0	0	0	0	0.054	0	0.9	0.087	0.906
PDE4D	AK8	1852945	1847970	9606.ENSP00000345502	9606.ENSP00000298545	0	0	0	0	0.054	0	0.9	0.087	0.906
NDE1	CCDC41	1852988	1852843	9606.ENSP00000345892	9606.ENSP00000344655	0	0	0	0	0	0	0.9	0.103	0.906
MUC16	ST6GAL1	1858543	1842306	9606.ENSP00000381008	9606.ENSP00000169298	0	0	0	0	0	0	0.9	0.101	0.906
LSM6	HSPA8	1847758	1843112	9606.ENSP00000296581	9606.ENSP00000227378	0	0	0	0	0.075	0	0.9	0.07	0.906
AK2	PDE4D	1853107	1852945	9606.ENSP00000346921	9606.ENSP00000345502	0	0	0	0	0.054	0	0.9	0.087	0.906
PDE4B	AK8	1851429	1847970	9606.ENSP00000332116	9606.ENSP00000298545	0	0	0	0	0.054	0	0.9	0.087	0.906
ACSS1	ACSS2	1849917	1844221	9606.ENSP00000316924	9606.ENSP00000253382	0	0	0.527	0.936	0	0	0.9	0.583	0.906
VDR	ARID1A	1862386	1850249	9606.ENSP00000447173	9606.ENSP00000320485	0	0	0	0	0	0.065	0.9	0.074	0.905
BCAS2	SART1	1855053	1849296	9606.ENSP00000358554	9606.ENSP00000310448	0	0	0	0	0.053	0	0.9	0.08	0.905
SART1	PRCC	1849296	1846199	9606.ENSP00000310448	9606.ENSP00000271526	0	0	0	0	0.09	0	0.9	0	0.905
BRCA1	POLE3	1861387	1856055	9606.ENSP00000418960	9606.ENSP00000363284	0	0	0	0	0	0	0.9	0.089	0.905
BCAS2	PRCC	1855053	1846199	9606.ENSP00000358554	9606.ENSP00000271526	0	0	0	0	0.071	0	0.9	0.064	0.905
NT5C2	PDE4B	1852221	1851429	9606.ENSP00000339479	9606.ENSP00000332116	0	0	0	0	0.089	0	0.9	0.045	0.905
KIF2C	NDE1	1855643	1852988	9606.ENSP00000361298	9606.ENSP00000345892	0	0	0	0	0.054	0	0.9	0.07	0.904
AK1	PDE4B	1855840	1851429	9606.ENSP00000362249	9606.ENSP00000332116	0	0	0	0	0.059	0	0.9	0.067	0.904
AK1	PDE4D	1855840	1852945	9606.ENSP00000362249	9606.ENSP00000345502	0	0	0	0	0.059	0	0.9	0.067	0.904
GABBR1	ADCY1	1856594	1847854	9606.ENSP00000366233	9606.ENSP00000297323	0	0	0	0	0.049	0	0.9	0.062	0.903
ADRBK1	HCRT	1849510	1847406	9606.ENSP00000312262	9606.ENSP00000293330	0	0	0	0	0	0	0.9	0.075	0.903
TSHR	ADCY1	1847934	1847854	9606.ENSP00000298171	9606.ENSP00000297323	0	0	0	0	0.053	0	0.9	0.06	0.903
LSM6	PRCC	1847758	1846199	9606.ENSP00000296581	9606.ENSP00000271526	0	0	0	0	0.069	0	0.9	0	0.903
COASY	ENPP1	1863897	1854095	9606.ENSP00000464814	9606.ENSP00000354238	0	0	0	0	0.073	0	0.9	0	0.903
PDE4B	ADK	1851429	1847021	9606.ENSP00000332116	9606.ENSP00000286621	0	0	0	0	0	0	0.9	0.065	0.902
SERPINA1	FOLR1	1853254	1849036	9606.ENSP00000348068	9606.ENSP00000308137	0	0	0	0	0.054	0	0.9	0.049	0.902
PIM1	ID2	1855921	1843383	9606.ENSP00000362608	9606.ENSP00000234091	0	0	0	0	0.05	0	0.9	0.053	0.902
HRAS	KRAS	1849235	1844404	9606.ENSP00000309845	9606.ENSP00000256078	0	0	0.527	0.983	0	0	0.9	0.736	0.902
SMAD4	SALL4	1852473	1842636	9606.ENSP00000341551	9606.ENSP00000217086	0	0	0	0	0	0	0.9	0.066	0.902
PHF20	AKT1	1856030	1846136	9606.ENSP00000363124	9606.ENSP00000270202	0	0	0	0	0	0	0.9	0.052	0.901
NDE1	PRKAR2B	1852988	1845791	9606.ENSP00000345892	9606.ENSP00000265717	0	0	0	0	0.054	0	0.9	0	0.901
ENPP1	PAPSS1	1854095	1845706	9606.ENSP00000354238	9606.ENSP00000265174	0	0	0	0	0.053	0	0.9	0	0.901
PDE4D	ADK	1852945	1847021	9606.ENSP00000345502	9606.ENSP00000286621	0	0	0	0	0	0	0.9	0.051	0.901
AK2	NT5C2	1853107	1852221	9606.ENSP00000346921	9606.ENSP00000339479	0	0	0	0	0.056	0	0.9	0.044	0.901
POLE4	BRCA1	1861462	1861387	9606.ENSP00000420176	9606.ENSP00000418960	0	0	0	0	0	0	0.9	0	0.9
POLE4	NME1	1861462	1842174	9606.ENSP00000420176	9606.ENSP00000013034	0	0	0	0	0	0	0.9	0	0.9
RAD51	POLE3	1857551	1856055	9606.ENSP00000372088	9606.ENSP00000363284	0	0	0	0	0	0	0.9	0	0.9
POLE4	POLB	1861462	1845748	9606.ENSP00000420176	9606.ENSP00000265421	0	0	0	0	0	0	0.9	0.046	0.9
NT5C2	AK8	1852221	1847970	9606.ENSP00000339479	9606.ENSP00000298545	0	0	0	0	0.042	0	0.9	0	0.9
POLE3	POLB	1856055	1845748	9606.ENSP00000363284	9606.ENSP00000265421	0	0	0	0	0	0	0.9	0	0.9
PRCC	HSPA8	1846199	1843112	9606.ENSP00000271526	9606.ENSP00000227378	0	0	0	0	0	0	0.9	0	0.9
POLE4	KIAA0101	1861462	1848123	9606.ENSP00000420176	9606.ENSP00000300035	0	0	0	0	0	0	0.9	0	0.9
CCDC41	PRKAR2B	1852843	1845791	9606.ENSP00000344655	9606.ENSP00000265717	0	0	0	0	0	0	0.9	0	0.9
POLE3	KIAA0101	1856055	1848123	9606.ENSP00000363284	9606.ENSP00000300035	0	0	0	0	0	0	0.9	0	0.9
ADRBK1	ANXA1	1849510	1844509	9606.ENSP00000312262	9606.ENSP00000257497	0	0	0	0	0	0	0.9	0	0.9
ENPP1	NT5C2	1854095	1852221	9606.ENSP00000354238	9606.ENSP00000339479	0	0	0	0	0	0	0.9	0	0.9
GABBR1	ANXA1	1856594	1844509	9606.ENSP00000366233	9606.ENSP00000257497	0	0	0	0	0	0	0.9	0	0.9
SART1	HSPA8	1849296	1843112	9606.ENSP00000310448	9606.ENSP00000227378	0	0	0	0	0	0	0.9	0	0.9
CCDC41	YWHAE	1852843	1845524	9606.ENSP00000344655	9606.ENSP00000264335	0	0	0	0	0	0	0.9	0	0.9
ADCY1	ANXA1	1847854	1844509	9606.ENSP00000297323	9606.ENSP00000257497	0	0	0	0	0.044	0	0.9	0	0.9
PDE4D	NT5C2	1852945	1852221	9606.ENSP00000345502	9606.ENSP00000339479	0	0	0	0	0	0	0.9	0	0.9
HCRT	ANXA1	1847406	1844509	9606.ENSP00000293330	9606.ENSP00000257497	0	0	0	0	0	0	0.9	0.049	0.9
POLB	POLE2	1845748	1842589	9606.ENSP00000265421	9606.ENSP00000216367	0	0	0	0	0	0	0.9	0.045	0.9
CCT3	HSPA8	1847605	1843112	9606.ENSP00000295688	9606.ENSP00000227378	0.309	0	0	0	0.578	0.532	0	0.346	0.899
BCAS3	BCAS4	1857879	1853745	9606.ENSP00000375067	9606.ENSP00000351642	0	0	0	0	0	0	0	0.899	0.899
TP53	PIK3CA	1846083	1845446	9606.ENSP00000269305	9606.ENSP00000263967	0	0	0	0	0	0.065	0	0.895	0.898
MT-CO1	COX6A2	1854132	1847071	9606.ENSP00000354499	9606.ENSP00000287490	0	0	0	0	0	0.822	0.36	0.17	0.897
ADK	AHCY	1847021	1842666	9606.ENSP00000286621	9606.ENSP00000217426	0.309	0	0	0	0.357	0.138	0	0.764	0.897
EEF2	LSM6	1849021	1847758	9606.ENSP00000307940	9606.ENSP00000296581	0	0	0	0	0.066	0.88	0	0.126	0.893
VEGFA	FGFR3	1855611	1852258	9606.ENSP00000361125	9606.ENSP00000339824	0	0	0	0	0.053	0.098	0.8	0.442	0.891
AKT1	CDH1	1846136	1844988	9606.ENSP00000270202	9606.ENSP00000261769	0	0	0	0	0	0.125	0	0.879	0.891
RAD51	TP53	1857551	1846083	9606.ENSP00000372088	9606.ENSP00000269305	0	0	0	0	0.102	0.36	0	0.826	0.891
COX6A2	COX6B1	1847071	1843826	9606.ENSP00000287490	9606.ENSP00000246554	0	0	0	0	0.728	0.074	0	0.572	0.882
IL10	VEGFA	1860958	1855611	9606.ENSP00000412237	9606.ENSP00000361125	0	0	0	0	0	0	0	0.882	0.882
CREB1	TP53	1859295	1846083	9606.ENSP00000387699	9606.ENSP00000269305	0	0	0	0	0.048	0.387	0	0.811	0.88
CLPB	HSPA8	1847462	1843112	9606.ENSP00000294053	9606.ENSP00000227378	0.309	0	0	0	0.354	0.369	0	0.623	0.879
COX7A1	COX6A2	1847387	1847071	9606.ENSP00000292907	9606.ENSP00000287490	0	0	0	0	0.243	0.667	0	0.559	0.879
ACVR1B	ACVR1	1862229	1845380	9606.ENSP00000442656	9606.ENSP00000263640	0	0	0	0.928	0.072	0.369	0.8	0.743	0.879
DNMT1	TP53	1853859	1846083	9606.ENSP00000352516	9606.ENSP00000269305	0	0	0	0	0	0.36	0	0.813	0.875
RRM2	KIAA0101	1854033	1848123	9606.ENSP00000353770	9606.ENSP00000300035	0	0	0	0	0.866	0	0	0.1	0.874
IL10	CRP	1860958	1844348	9606.ENSP00000412237	9606.ENSP00000255030	0	0	0	0	0	0	0	0.871	0.871
COX7A1	COX5B	1847387	1844605	9606.ENSP00000292907	9606.ENSP00000258424	0	0	0	0	0.119	0.667	0	0.593	0.87
CREB1	PPP1CC	1859295	1851808	9606.ENSP00000387699	9606.ENSP00000335084	0	0	0	0	0.064	0	0.8	0.362	0.87
CDKN2A	KRAS	1859838	1844404	9606.ENSP00000394932	9606.ENSP00000256078	0	0	0	0	0.049	0.12	0	0.857	0.87
MT-CO3	COX6A2	1854274	1847071	9606.ENSP00000354982	9606.ENSP00000287490	0	0	0	0	0	0.773	0.36	0.169	0.868
VEGFA	PTEN	1855611	1855586	9606.ENSP00000361125	9606.ENSP00000361021	0	0	0	0	0	0	0	0.867	0.867
HRAS	AKT1	1849235	1846136	9606.ENSP00000309845	9606.ENSP00000270202	0	0	0	0	0	0.176	0	0.836	0.859
POLE	RRM1	1850463	1848209	9606.ENSP00000322570	9606.ENSP00000300738	0	0	0	0	0.756	0.054	0	0.44	0.859
HINT1	COX7C	1848614	1843871	9606.ENSP00000304229	9606.ENSP00000247655	0	0	0	0	0.852	0	0	0.065	0.856
PTEN	CDH1	1855586	1844988	9606.ENSP00000361021	9606.ENSP00000261769	0	0	0	0	0.053	0.325	0	0.791	0.855
TP53	HSPA8	1846083	1843112	9606.ENSP00000269305	9606.ENSP00000227378	0	0	0	0	0.052	0.396	0	0.766	0.855
VCP	RNF139	1853766	1848594	9606.ENSP00000351777	9606.ENSP00000304051	0	0	0	0	0.049	0.17	0.72	0.409	0.852
NDUFA13	COX5B	1861604	1844605	9606.ENSP00000423673	9606.ENSP00000258424	0	0	0	0	0.818	0	0	0.219	0.852
TGFBR2	ACVR1	1853779	1845380	9606.ENSP00000351905	9606.ENSP00000263640	0	0	0	0.778	0.095	0.639	0.54	0.399	0.85
VEGFA	HRAS	1855611	1849235	9606.ENSP00000361125	9606.ENSP00000309845	0	0	0	0	0	0	0	0.85	0.85
SMAD4	AKT1	1852473	1846136	9606.ENSP00000341551	9606.ENSP00000270202	0	0	0	0	0.056	0.615	0	0.615	0.848
HINT1	RPL27	1848614	1844249	9606.ENSP00000304229	9606.ENSP00000253788	0	0	0	0	0.794	0	0	0.293	0.848
CDKN2A	PTEN	1859838	1855586	9606.ENSP00000394932	9606.ENSP00000361021	0	0	0	0	0.051	0.094	0	0.834	0.846
ABL1	PIK3CA	1855665	1845446	9606.ENSP00000361423	9606.ENSP00000263967	0	0	0	0	0.055	0.11	0	0.83	0.845
DNMT1	SETD7	1853859	1846356	9606.ENSP00000352516	9606.ENSP00000274031	0	0	0	0	0.072	0.448	0	0.72	0.845
CDKN2A	AKT1	1859838	1846136	9606.ENSP00000394932	9606.ENSP00000270202	0	0	0	0	0.053	0.135	0	0.824	0.844
VEGFA	CRP	1855611	1844348	9606.ENSP00000361125	9606.ENSP00000255030	0	0	0	0	0	0	0	0.841	0.841
VEGFA	CTNNB1	1855611	1852818	9606.ENSP00000361125	9606.ENSP00000344456	0	0	0	0	0	0	0	0.838	0.838
FHIT	HINT1	1852550	1848614	9606.ENSP00000342087	9606.ENSP00000304229	0	0	0	0	0.043	0	0	0.838	0.838
SMAD4	TP53	1852473	1846083	9606.ENSP00000341551	9606.ENSP00000269305	0	0	0	0	0.058	0	0	0.833	0.836
VEGFA	CDH1	1855611	1844988	9606.ENSP00000361125	9606.ENSP00000261769	0	0	0	0	0	0	0	0.83	0.83
PTEN	HRAS	1855586	1849235	9606.ENSP00000361021	9606.ENSP00000309845	0	0	0	0	0.053	0.164	0	0.802	0.829
APAF1	FAS	1862487	1853242	9606.ENSP00000448165	9606.ENSP00000347979	0	0	0	0	0	0.36	0	0.743	0.829
BRCA1	MLH1	1861387	1843304	9606.ENSP00000418960	9606.ENSP00000231790	0	0	0	0	0.068	0.359	0	0.734	0.827
PRKAB2	PFKFB4	1844272	1843311	9606.ENSP00000254101	9606.ENSP00000232375	0	0	0	0	0.061	0.113	0.8	0.086	0.827
PFKFB4	PRKAB1	1843311	1843198	9606.ENSP00000232375	9606.ENSP00000229328	0	0	0	0	0.061	0.113	0.8	0.086	0.827
CDKN2A	VEGFA	1859838	1855611	9606.ENSP00000394932	9606.ENSP00000361125	0	0	0	0	0.049	0	0	0.826	0.827
RNF139	VHL	1848594	1844441	9606.ENSP00000304051	9606.ENSP00000256474	0	0	0	0	0	0.586	0	0.596	0.826
VEGFA	PPARG	1855611	1847090	9606.ENSP00000361125	9606.ENSP00000287820	0	0	0	0	0	0	0	0.826	0.826
PRKAA1	PFKFB4	1853021	1843311	9606.ENSP00000346148	9606.ENSP00000232375	0	0	0	0	0.06	0.097	0.8	0.093	0.825
TP53	VHL	1846083	1844441	9606.ENSP00000269305	9606.ENSP00000256474	0	0	0	0	0	0.325	0	0.752	0.825
ACVR1B	TGFBR2	1862229	1853779	9606.ENSP00000442656	9606.ENSP00000351905	0	0	0	0.764	0.066	0.584	0.54	0.421	0.824
VEGFA	KRAS	1855611	1844404	9606.ENSP00000361125	9606.ENSP00000256078	0	0	0	0	0	0	0	0.824	0.824
RPL27	COX7C	1844249	1843871	9606.ENSP00000253788	9606.ENSP00000247655	0	0	0	0	0.819	0	0	0.057	0.822
COX6C	COX6A2	1847885	1847071	9606.ENSP00000297564	9606.ENSP00000287490	0	0	0	0	0.264	0.612	0	0.404	0.815
BPIFA1	COX7B2	1853031	1848792	9606.ENSP00000346251	9606.ENSP00000305964	0	0	0	0	0	0	0	0.813	0.813
ABCA1	PPARG	1856172	1847090	9606.ENSP00000363868	9606.ENSP00000287820	0	0	0	0	0	0.066	0	0.807	0.812
ABL1	VEGFA	1855665	1855611	9606.ENSP00000361423	9606.ENSP00000361125	0	0	0	0	0	0.098	0	0.8	0.812
LGALS8	CSAD	1849200	1845917	9606.ENSP00000309576	9606.ENSP00000267085	0	0	0	0	0	0	0	0.811	0.811
MT-CO2	COX6A2	1854241	1847071	9606.ENSP00000354876	9606.ENSP00000287490	0	0	0	0	0	0.667	0.36	0.183	0.81
BCAS2	EEF2	1855053	1849021	9606.ENSP00000358554	9606.ENSP00000307940	0	0	0	0	0.055	0.787	0	0.123	0.808
CDH1	APC	1844988	1844508	9606.ENSP00000261769	9606.ENSP00000257430	0	0	0	0	0.043	0	0.72	0.341	0.807
ADRBK2	SMO	1849968	1843960	9606.ENSP00000317578	9606.ENSP00000249373	0	0	0	0	0.044	0	0.8	0.065	0.805
UCK2	CTNNB1	1854680	1852818	9606.ENSP00000356853	9606.ENSP00000344456	0.067	0	0	0	0.068	0.55	0.435	0.254	0.805
PTEN	KRAS	1855586	1844404	9606.ENSP00000361021	9606.ENSP00000256078	0	0	0	0	0.079	0.164	0	0.763	0.802
SOAT2	SULT2B1	1848301	1842398	9606.ENSP00000301466	9606.ENSP00000201586	0	0	0	0	0.053	0	0.8	0	0.802
KIF2C	RRM2	1855643	1854033	9606.ENSP00000361298	9606.ENSP00000353770	0	0	0	0	0.773	0	0	0.152	0.8
COX7B	COX7B2	1861313	1848792	9606.ENSP00000417656	9606.ENSP00000305964	0	0	0	0.977	0	0	0.8	0.188	0.8
IL10	AKT1	1860958	1846136	9606.ENSP00000412237	9606.ENSP00000270202	0	0	0	0	0	0	0	0.798	0.798
ATP1A1	AFG3L2	1847591	1846068	9606.ENSP00000295598	9606.ENSP00000269143	0.042	0	0	0	0.052	0.788	0	0.07	0.797
CTNNB1	PPARG	1852818	1847090	9606.ENSP00000344456	9606.ENSP00000287820	0	0	0	0	0	0.376	0	0.686	0.795
VCP	HSPA8	1853766	1843112	9606.ENSP00000351777	9606.ENSP00000227378	0.073	0	0	0	0.118	0.53	0	0.521	0.792
BRCA1	CDKN2A	1861387	1859838	9606.ENSP00000418960	9606.ENSP00000394932	0	0	0	0	0	0.404	0	0.66	0.789
PTEN	CTNNB1	1855586	1852818	9606.ENSP00000361021	9606.ENSP00000344456	0	0	0	0	0.061	0.391	0	0.66	0.789
RAD51	RRM2	1857551	1854033	9606.ENSP00000372088	9606.ENSP00000353770	0	0	0	0	0.679	0	0	0.37	0.789
RRM2	POLE2	1854033	1842589	9606.ENSP00000353770	9606.ENSP00000216367	0	0	0	0	0.765	0	0	0.132	0.788
KIF2C	KIAA0101	1855643	1848123	9606.ENSP00000361298	9606.ENSP00000300035	0	0	0	0	0.75	0.135	0	0.098	0.788
CREB1	PTEN	1859295	1855586	9606.ENSP00000387699	9606.ENSP00000361021	0	0	0	0	0.146	0	0	0.759	0.786
CREB1	CTNNB1	1859295	1852818	9606.ENSP00000387699	9606.ENSP00000344456	0	0	0	0	0.062	0.36	0	0.67	0.785
EEF2	HSPA8	1849021	1843112	9606.ENSP00000307940	9606.ENSP00000227378	0.056	0	0	0	0.306	0.46	0	0.459	0.784
TRPM7	ANXA1	1850224	1844509	9606.ENSP00000320239	9606.ENSP00000257497	0	0	0	0	0	0.36	0	0.674	0.782
COX7A1	COX4I1	1847387	1844229	9606.ENSP00000292907	9606.ENSP00000253452	0	0	0	0	0.126	0.667	0	0.314	0.782
PPARG	TP53	1847090	1846083	9606.ENSP00000287820	9606.ENSP00000269305	0	0	0	0	0	0	0	0.78	0.78
AKT1	KRAS	1846136	1844404	9606.ENSP00000270202	9606.ENSP00000256078	0	0	0	0	0.044	0.176	0	0.743	0.78
IL10	FAS	1860958	1853242	9606.ENSP00000412237	9606.ENSP00000347979	0	0	0	0	0	0	0	0.78	0.78
DNMT1	AKT1	1853859	1846136	9606.ENSP00000352516	9606.ENSP00000270202	0	0	0	0	0.042	0.411	0	0.64	0.779
NDUFA13	AFG3L2	1861604	1846068	9606.ENSP00000423673	9606.ENSP00000269143	0	0	0	0	0.054	0.774	0	0.044	0.778
TP53	CAT	1846083	1843587	9606.ENSP00000269305	9606.ENSP00000241052	0	0	0	0	0	0	0	0.776	0.777
COX6C	COX7A1	1847885	1847387	9606.ENSP00000297564	9606.ENSP00000292907	0	0	0	0	0.054	0.667	0	0.348	0.776
CREB1	ABL1	1859295	1855665	9606.ENSP00000387699	9606.ENSP00000361423	0	0	0	0	0.049	0.36	0	0.662	0.776
WARS	SMCHD1	1853177	1850852	9606.ENSP00000347495	9606.ENSP00000326603	0	0	0	0	0	0.774	0	0	0.774
IL10	IFNA1	1860958	1846520	9606.ENSP00000412237	9606.ENSP00000276927	0	0	0	0	0	0	0	0.774	0.774
RAD51	GALK1	1857551	1843038	9606.ENSP00000372088	9606.ENSP00000225614	0	0	0	0	0.052	0	0	0.769	0.772
POLE	MLH1	1850463	1843304	9606.ENSP00000322570	9606.ENSP00000231790	0	0	0	0	0.237	0.12	0.54	0.347	0.771
COX8A	COX6A2	1850328	1847071	9606.ENSP00000321260	9606.ENSP00000287490	0	0	0	0	0.22	0	0.36	0.576	0.77
COX7B	COX6A2	1861313	1847071	9606.ENSP00000417656	9606.ENSP00000287490	0	0	0	0	0.053	0.445	0.36	0.394	0.769
COX7B	COX7A1	1861313	1847387	9606.ENSP00000417656	9606.ENSP00000292907	0	0	0	0	0.054	0.445	0	0.594	0.768
RAD51	POLA1	1857551	1856974	9606.ENSP00000372088	9606.ENSP00000368349	0	0	0	0	0.123	0.183	0	0.699	0.766
VEGFA	SMAD4	1855611	1852473	9606.ENSP00000361125	9606.ENSP00000341551	0	0	0	0	0	0	0	0.765	0.765
TSHR	SLC5A5	1847934	1842895	9606.ENSP00000298171	9606.ENSP00000222248	0	0	0	0	0.054	0	0	0.758	0.761
CDKN2A	MLH1	1859838	1843304	9606.ENSP00000394932	9606.ENSP00000231790	0	0	0	0	0.054	0	0	0.758	0.761
KIF2C	GSG2	1855643	1850722	9606.ENSP00000361298	9606.ENSP00000325290	0	0	0	0	0.149	0	0	0.73	0.76
ARID1A	TP53	1850249	1846083	9606.ENSP00000320485	9606.ENSP00000269305	0	0	0	0	0	0.36	0	0.638	0.759
CDC73	KIAA0101	1854592	1848123	9606.ENSP00000356405	9606.ENSP00000300035	0	0	0	0	0	0	0	0.756	0.756
PTCH1	ADRBK1	1851463	1849510	9606.ENSP00000332353	9606.ENSP00000312262	0	0	0	0	0	0.36	0	0.631	0.754
PTEN	SMAD4	1855586	1852473	9606.ENSP00000361021	9606.ENSP00000341551	0	0	0	0	0.135	0	0	0.726	0.753
ABL1	HRAS	1855665	1849235	9606.ENSP00000361423	9606.ENSP00000309845	0	0	0	0	0.073	0.271	0	0.662	0.752
SMAD4	ACVR1	1852473	1845380	9606.ENSP00000341551	9606.ENSP00000263640	0	0	0	0	0.063	0.173	0	0.705	0.751
ADA	AHCY	1855776	1842666	9606.ENSP00000361965	9606.ENSP00000217426	0.053	0	0	0	0.115	0	0	0.725	0.75
CTNNB1	TP53	1852818	1846083	9606.ENSP00000344456	9606.ENSP00000269305	0	0	0	0	0	0	0	0.749	0.749
IL10	PIK3CA	1860958	1845446	9606.ENSP00000412237	9606.ENSP00000263967	0	0	0	0	0	0	0	0.748	0.748
DNMT1	CDH1	1853859	1844988	9606.ENSP00000352516	9606.ENSP00000261769	0	0	0	0	0	0.173	0	0.707	0.747
COX7B2	COX4I1	1848792	1844229	9606.ENSP00000305964	9606.ENSP00000253452	0	0	0	0	0.098	0.376	0.54	0.134	0.745
SLC25A4	RRM2B	1846728	1844085	9606.ENSP00000281456	9606.ENSP00000251810	0	0	0	0	0.055	0	0	0.74	0.743
PTEN	PPARG	1855586	1847090	9606.ENSP00000361021	9606.ENSP00000287820	0	0	0	0	0	0	0	0.741	0.741
ANG	TP53	1851922	1846083	9606.ENSP00000336762	9606.ENSP00000269305	0	0	0	0	0	0.36	0	0.612	0.741
RRM2	TP53	1854033	1846083	9606.ENSP00000353770	9606.ENSP00000269305	0	0	0	0	0.088	0.285	0	0.631	0.739
NDUFA13	COX5A	1861604	1849982	9606.ENSP00000423673	9606.ENSP00000317780	0	0	0	0	0.703	0	0	0.156	0.738
FAS	PIK3CA	1853242	1845446	9606.ENSP00000347979	9606.ENSP00000263967	0	0	0	0	0	0	0	0.738	0.738
SMAD4	KRAS	1852473	1844404	9606.ENSP00000341551	9606.ENSP00000256078	0	0	0	0	0.117	0.067	0	0.706	0.736
CRTC1	AKT1	1852882	1846136	9606.ENSP00000345001	9606.ENSP00000270202	0	0	0	0	0.054	0	0	0.731	0.735
TRMT1L	NOC2L	1854608	1850000	9606.ENSP00000356476	9606.ENSP00000317992	0	0	0	0	0.732	0	0	0	0.732
CTNNB1	PTK7	1852818	1843252	9606.ENSP00000344456	9606.ENSP00000230419	0	0	0	0	0.051	0.446	0	0.528	0.731
DSE	SART1	1851436	1849296	9606.ENSP00000332151	9606.ENSP00000310448	0	0	0	0	0	0	0	0.729	0.729
PRMT1	NOC2L	1860583	1850000	9606.ENSP00000406162	9606.ENSP00000317992	0	0	0	0	0.728	0	0	0	0.728
ABL1	ABCB1	1855665	1845794	9606.ENSP00000361423	9606.ENSP00000265724	0.048	0	0	0	0.085	0.094	0	0.693	0.726
KRAS	MLH1	1844404	1843304	9606.ENSP00000256078	9606.ENSP00000231790	0	0	0	0	0	0	0	0.726	0.726
POLA1	TP53	1856974	1846083	9606.ENSP00000368349	9606.ENSP00000269305	0	0	0	0	0.054	0.36	0	0.58	0.724
RAD51	KIAA0101	1857551	1848123	9606.ENSP00000372088	9606.ENSP00000300035	0	0	0	0	0.701	0	0	0.115	0.724
MT-CO3	COX7B2	1854274	1848792	9606.ENSP00000354982	9606.ENSP00000305964	0	0	0	0	0	0.376	0.54	0.118	0.724
IL10	CREB1	1860958	1859295	9606.ENSP00000412237	9606.ENSP00000387699	0	0	0	0	0	0	0	0.723	0.723
VCP	AKT1	1853766	1846136	9606.ENSP00000351777	9606.ENSP00000270202	0	0	0	0	0.054	0.396	0	0.544	0.717
RET	PTCH1	1853238	1851463	9606.ENSP00000347942	9606.ENSP00000332353	0	0	0	0	0	0.045	0	0.713	0.715
MT-CO2	COX7B2	1854241	1848792	9606.ENSP00000354876	9606.ENSP00000305964	0	0	0	0	0.054	0.376	0.54	0.074	0.714
MT-CO3	COX7A1	1854274	1847387	9606.ENSP00000354982	9606.ENSP00000292907	0	0	0	0	0	0.667	0	0.168	0.711
PNP	AK2	1854141	1853107	9606.ENSP00000354532	9606.ENSP00000346921	0.063	0	0	0	0.053	0	0.435	0.491	0.71
PBRM1	TP53	1858233	1846083	9606.ENSP00000378307	9606.ENSP00000269305	0	0	0	0	0	0.381	0	0.548	0.708
PRKAA1	FLCN	1853021	1846946	9606.ENSP00000346148	9606.ENSP00000285071	0	0	0	0	0	0.144	0	0.669	0.704
HRAS	CDH1	1849235	1844988	9606.ENSP00000309845	9606.ENSP00000261769	0	0	0	0	0	0.126	0	0.675	0.704
SMAD4	HRAS	1852473	1849235	9606.ENSP00000341551	9606.ENSP00000309845	0	0	0	0	0.054	0.145	0	0.663	0.704
DIRC2	VHL	1844845	1844441	9606.ENSP00000261038	9606.ENSP00000256474	0	0	0	0	0.054	0	0	0.699	0.703
PNP	AK8	1854141	1847970	9606.ENSP00000354532	9606.ENSP00000298545	0.063	0	0	0	0.055	0	0.435	0.475	0.702
MT-CO1	COX7A1	1854132	1847387	9606.ENSP00000354499	9606.ENSP00000292907	0	0	0	0	0	0.667	0	0.144	0.702
CTNNB1	FHL2	1852818	1850494	9606.ENSP00000344456	9606.ENSP00000322909	0	0	0	0	0	0.36	0	0.554	0.702
MT-CO1	COX7B2	1854132	1848792	9606.ENSP00000354499	9606.ENSP00000305964	0	0	0	0	0	0.376	0.54	0	0.7
RAD51	RRM1	1857551	1848209	9606.ENSP00000372088	9606.ENSP00000300738	0	0	0	0	0.378	0	0	0.533	0.697
MT-CO2	COX7A1	1854241	1847387	9606.ENSP00000354876	9606.ENSP00000292907	0	0	0	0	0	0.667	0	0.129	0.697
HRAS	MLH1	1849235	1843304	9606.ENSP00000309845	9606.ENSP00000231790	0	0	0	0	0	0	0	0.696	0.696
POLA1	RRM2	1856974	1854033	9606.ENSP00000368349	9606.ENSP00000353770	0	0	0	0	0.434	0.124	0	0.43	0.693
CTNNB1	HRAS	1852818	1849235	9606.ENSP00000344456	9606.ENSP00000309845	0	0	0	0	0.054	0.095	0	0.668	0.691
STK11	PIK3CA	1850687	1845446	9606.ENSP00000324856	9606.ENSP00000263967	0	0	0	0	0.058	0.11	0	0.657	0.687
CTNNB1	KRAS	1852818	1844404	9606.ENSP00000344456	9606.ENSP00000256078	0	0	0	0	0.054	0.095	0	0.663	0.686
CDKN2A	CDH1	1859838	1844988	9606.ENSP00000394932	9606.ENSP00000261769	0	0	0	0	0	0	0	0.682	0.682
CTNNB1	NME1	1852818	1842174	9606.ENSP00000344456	9606.ENSP00000013034	0.079	0	0	0	0.07	0	0	0.656	0.68
VEGFA	STK11	1855611	1850687	9606.ENSP00000361125	9606.ENSP00000324856	0	0	0	0	0	0.098	0	0.659	0.679
PPARG	CDH1	1847090	1844988	9606.ENSP00000287820	9606.ENSP00000261769	0	0	0	0	0	0	0	0.679	0.679
STK11	HRAS	1850687	1849235	9606.ENSP00000324856	9606.ENSP00000309845	0	0	0	0	0.059	0.24	0	0.587	0.679
PPARG	AKT1	1847090	1846136	9606.ENSP00000287820	9606.ENSP00000270202	0	0	0	0	0.048	0.058	0	0.667	0.675
SIRT3	TP53	1857564	1846083	9606.ENSP00000372191	9606.ENSP00000269305	0	0	0	0	0	0.078	0	0.661	0.674
APAF1	CDC73	1862487	1854592	9606.ENSP00000448165	9606.ENSP00000356405	0	0	0	0	0.126	0.524	0	0.28	0.674
TP53	ANXA1	1846083	1844509	9606.ENSP00000269305	9606.ENSP00000257497	0	0	0	0	0	0	0	0.672	0.672
STK11	KRAS	1850687	1844404	9606.ENSP00000324856	9606.ENSP00000256078	0	0	0	0	0.059	0.17	0	0.614	0.672
TP53	LGALS3	1846083	1844285	9606.ENSP00000269305	9606.ENSP00000254301	0	0	0	0	0	0	0	0.671	0.671
COX5A	COX7B2	1849982	1848792	9606.ENSP00000317780	9606.ENSP00000305964	0	0	0	0	0.271	0	0.54	0.098	0.671
CDKN2A	FHIT	1859838	1852550	9606.ENSP00000394932	9606.ENSP00000342087	0.065	0	0	0	0.051	0	0	0.658	0.67
BRCA1	AKT1	1861387	1846136	9606.ENSP00000418960	9606.ENSP00000270202	0	0	0	0	0	0.36	0	0.504	0.669
KIF2C	POLE2	1855643	1842589	9606.ENSP00000361298	9606.ENSP00000216367	0	0	0	0	0.654	0	0	0.079	0.668
ABCC2	NR1I3	1855255	1854699	9606.ENSP00000359478	9606.ENSP00000356958	0	0	0	0	0.053	0	0	0.664	0.668
COX6A2	RPL27	1847071	1844249	9606.ENSP00000287490	9606.ENSP00000253788	0	0	0	0	0.667	0	0	0	0.667
COX7A1	COX7C	1847387	1843871	9606.ENSP00000292907	9606.ENSP00000247655	0	0	0	0	0.055	0.445	0	0.416	0.667
SLC26A8	PAPSS1	1853215	1845706	9606.ENSP00000347778	9606.ENSP00000265174	0	0	0	0	0.354	0	0	0.505	0.666
TGFBR2	TP53	1853779	1846083	9606.ENSP00000351905	9606.ENSP00000269305	0	0	0	0	0	0	0	0.663	0.663
BRCA1	PTEN	1861387	1855586	9606.ENSP00000418960	9606.ENSP00000361021	0	0	0	0	0.054	0	0	0.658	0.662
PTEN	DNMT1	1855586	1853859	9606.ENSP00000361021	9606.ENSP00000352516	0	0	0	0	0.1	0	0	0.639	0.662
FHIT	TP53	1852550	1846083	9606.ENSP00000342087	9606.ENSP00000269305	0	0	0	0	0	0.126	0	0.63	0.662
RRM1	POLE2	1848209	1842589	9606.ENSP00000300738	9606.ENSP00000216367	0	0	0	0	0.623	0	0	0.135	0.661
ABL2	EPHB2	1861715	1856154	9606.ENSP00000427562	9606.ENSP00000363763	0	0	0	0.66	0.073	0.644	0	0.082	0.661
POLA1	RRM2B	1856974	1844085	9606.ENSP00000368349	9606.ENSP00000251810	0	0	0	0	0.387	0.124	0	0.417	0.659
CCDC19	SULT2B1	1854731	1842398	9606.ENSP00000357079	9606.ENSP00000201586	0	0	0	0	0	0	0	0.658	0.658
TP53	ID2	1846083	1843383	9606.ENSP00000269305	9606.ENSP00000234091	0	0	0	0	0	0.097	0	0.634	0.655
NDUFA13	COX8A	1861604	1850328	9606.ENSP00000423673	9606.ENSP00000321260	0	0	0	0	0.621	0	0	0.127	0.655
BRCA1	KIAA0101	1861387	1848123	9606.ENSP00000418960	9606.ENSP00000300035	0	0	0	0	0.433	0.36	0	0.126	0.655
ACVRL1	SMAD4	1857773	1852473	9606.ENSP00000373574	9606.ENSP00000341551	0	0	0	0	0.063	0.173	0	0.589	0.654
ABL1	KRAS	1855665	1844404	9606.ENSP00000361423	9606.ENSP00000256078	0	0	0	0	0.073	0.271	0	0.527	0.652
COX8A	COX7B2	1850328	1848792	9606.ENSP00000321260	9606.ENSP00000305964	0	0	0	0	0.238	0	0.54	0.088	0.652
PCMT1	RRM2	1854577	1854033	9606.ENSP00000356348	9606.ENSP00000353770	0.309	0	0	0	0.055	0.503	0	0	0.647
CDH1	KRAS	1844988	1844404	9606.ENSP00000261769	9606.ENSP00000256078	0	0	0	0	0	0	0	0.647	0.647
SART1	EEF2	1849296	1849021	9606.ENSP00000310448	9606.ENSP00000307940	0	0	0	0	0.056	0.603	0	0.133	0.646
DNMT1	MLH1	1853859	1843304	9606.ENSP00000352516	9606.ENSP00000231790	0	0	0	0	0.122	0	0	0.613	0.646
NAGA	CTSA	1858390	1855691	9606.ENSP00000379680	9606.ENSP00000361562	0	0	0	0	0.085	0	0	0.629	0.646
FHL2	ZNF638	1850494	1845551	9606.ENSP00000322909	9606.ENSP00000264447	0	0	0	0	0	0.36	0	0.468	0.645
PEG10	ACVRL1	1861308	1857773	9606.ENSP00000417587	9606.ENSP00000373574	0	0	0	0	0	0.336	0	0.488	0.645
NR1I3	SULT2A1	1854699	1842878	9606.ENSP00000356958	9606.ENSP00000222002	0	0	0	0	0.063	0.36	0	0.454	0.645
PTEN	MET	1855586	1849944	9606.ENSP00000361021	9606.ENSP00000317272	0	0	0	0	0.067	0.17	0	0.577	0.643
RAD51	KIF2C	1857551	1855643	9606.ENSP00000372088	9606.ENSP00000361298	0	0	0	0	0.612	0	0	0.115	0.642
KRAS	LGALS3	1844404	1844285	9606.ENSP00000256078	9606.ENSP00000254301	0	0	0	0	0.051	0	0	0.637	0.641
ABCC2	HRAS	1855255	1849235	9606.ENSP00000359478	9606.ENSP00000309845	0	0	0	0	0	0.054	0	0.636	0.641
FAS	HRAS	1853242	1849235	9606.ENSP00000347979	9606.ENSP00000309845	0	0	0	0	0	0	0	0.64	0.641
TKT	CAT	1860530	1843587	9606.ENSP00000405455	9606.ENSP00000241052	0	0	0	0	0.268	0.053	0	0.523	0.641
MET	KRAS	1849944	1844404	9606.ENSP00000317272	9606.ENSP00000256078	0	0	0	0	0.046	0.17	0	0.582	0.64
RAD51	PAPSS1	1857551	1845706	9606.ENSP00000372088	9606.ENSP00000265174	0	0	0	0	0	0	0	0.64	0.64
APAF1	ABL1	1862487	1855665	9606.ENSP00000448165	9606.ENSP00000361423	0	0	0	0	0.042	0.095	0	0.618	0.64
ABL1	FAS	1855665	1853242	9606.ENSP00000361423	9606.ENSP00000347979	0	0	0	0	0	0	0	0.639	0.639
NR1I3	ABCB11	1854699	1845420	9606.ENSP00000356958	9606.ENSP00000263817	0	0	0	0	0.053	0	0	0.631	0.636
AK1	PNP	1855840	1854141	9606.ENSP00000362249	9606.ENSP00000354532	0.063	0	0	0	0	0	0.435	0.368	0.636
CDKN2A	DNMT1	1859838	1853859	9606.ENSP00000394932	9606.ENSP00000352516	0	0	0	0	0.053	0	0	0.63	0.634
TP53	NME1	1846083	1842174	9606.ENSP00000269305	9606.ENSP00000013034	0	0	0	0	0.074	0	0	0.62	0.633
COX7B2	COX6A2	1848792	1847071	9606.ENSP00000305964	9606.ENSP00000287490	0	0	0	0	0.053	0.376	0.36	0.144	0.633
TFDP3	EEF2	1859036	1849021	9606.ENSP00000385461	9606.ENSP00000307940	0	0	0	0	0.072	0	0	0.62	0.632
SIRT3	STK11	1857564	1850687	9606.ENSP00000372191	9606.ENSP00000324856	0.053	0	0	0	0.046	0.063	0	0.615	0.631
FABP6	ABCB11	1858148	1845420	9606.ENSP00000377549	9606.ENSP00000263817	0	0	0	0	0.044	0	0	0.63	0.631
VEGFA	ANG	1855611	1851922	9606.ENSP00000361125	9606.ENSP00000336762	0	0	0	0	0	0	0	0.63	0.63
NDUFA13	COX6B1	1861604	1843826	9606.ENSP00000423673	9606.ENSP00000246554	0	0	0	0	0.621	0	0	0.062	0.629
EEF2	RRM1	1849021	1848209	9606.ENSP00000307940	9606.ENSP00000300738	0	0	0	0	0.142	0.503	0	0.196	0.628
PPARG	CRP	1847090	1844348	9606.ENSP00000287820	9606.ENSP00000255030	0	0	0	0	0	0	0	0.628	0.628
IL10	TP53	1860958	1846083	9606.ENSP00000412237	9606.ENSP00000269305	0	0	0	0	0	0	0	0.628	0.628
FLCN	PRCC	1846946	1846199	9606.ENSP00000285071	9606.ENSP00000271526	0	0	0	0	0	0	0	0.628	0.628
BAG1	TP53	1861489	1846083	9606.ENSP00000420514	9606.ENSP00000269305	0	0	0	0	0	0.36	0	0.44	0.626
ZNF521	SMAD4	1854220	1852473	9606.ENSP00000354794	9606.ENSP00000341551	0	0	0	0	0	0.34	0	0.455	0.626
NDUFA13	COX6C	1861604	1847885	9606.ENSP00000423673	9606.ENSP00000297564	0	0	0	0	0.585	0	0	0.134	0.626
FLCN	PRKAB1	1846946	1843198	9606.ENSP00000285071	9606.ENSP00000229328	0	0	0	0	0	0	0	0.625	0.625
ARAF	TP53	1856599	1846083	9606.ENSP00000366244	9606.ENSP00000269305	0	0	0	0	0	0	0	0.624	0.624
CCT3	NME1	1847605	1842174	9606.ENSP00000295688	9606.ENSP00000013034	0	0	0	0	0.567	0.047	0	0.161	0.623
VEGFA	NME1	1855611	1842174	9606.ENSP00000361125	9606.ENSP00000013034	0	0	0	0	0	0	0	0.622	0.622
TP53	POLB	1846083	1845748	9606.ENSP00000269305	9606.ENSP00000265421	0	0	0	0	0	0	0	0.622	0.622
SMAD4	PIK3CA	1852473	1845446	9606.ENSP00000341551	9606.ENSP00000263967	0	0	0	0	0.216	0	0	0.535	0.621
PRKAA1	PIK3CA	1853021	1845446	9606.ENSP00000346148	9606.ENSP00000263967	0	0	0	0	0.143	0.118	0	0.539	0.621
AKT1	LGALS3	1846136	1844285	9606.ENSP00000270202	9606.ENSP00000254301	0	0	0	0	0	0	0	0.619	0.62
RAD51	PTEN	1857551	1855586	9606.ENSP00000372088	9606.ENSP00000361021	0	0	0	0	0.062	0.407	0	0.371	0.62
ABL2	HRAS	1861715	1849235	9606.ENSP00000427562	9606.ENSP00000309845	0	0	0	0	0.073	0.486	0	0.261	0.618
TRPM7	EEF2	1850224	1849021	9606.ENSP00000320239	9606.ENSP00000307940	0	0	0	0	0	0.36	0	0.425	0.616
FAS	AKT1	1853242	1846136	9606.ENSP00000347979	9606.ENSP00000270202	0	0	0	0	0	0.046	0	0.614	0.616
CDH1	ID2	1844988	1843383	9606.ENSP00000261769	9606.ENSP00000234091	0	0	0	0	0	0	0	0.616	0.616
FXYD5	CDH1	1852792	1844988	9606.ENSP00000344254	9606.ENSP00000261769	0	0	0	0	0	0	0	0.615	0.615
MLH1	POLE2	1843304	1842589	9606.ENSP00000231790	9606.ENSP00000216367	0	0	0	0	0.196	0	0.54	0	0.614
ABL1	PTEN	1855665	1855586	9606.ENSP00000361423	9606.ENSP00000361021	0	0	0	0	0.053	0.17	0	0.548	0.614
TFDP3	RRM2	1859036	1854033	9606.ENSP00000385461	9606.ENSP00000353770	0	0	0	0	0.123	0	0	0.576	0.613
AK2	ATP1A1	1853107	1847591	9606.ENSP00000346921	9606.ENSP00000295598	0.048	0	0	0	0	0	0.401	0.375	0.613
SIRT3	SIRT5	1857564	1857002	9606.ENSP00000372191	9606.ENSP00000368552	0	0	0.526	0.686	0.056	0.343	0	0.899	0.609
ACVRL1	ACVR1	1857773	1845380	9606.ENSP00000373574	9606.ENSP00000263640	0	0	0	0.965	0	0.601	0	0.62	0.609
PIM1	PRKAB1	1855921	1843198	9606.ENSP00000362608	9606.ENSP00000229328	0	0	0	0	0.059	0.471	0	0.277	0.608
PIM1	PRKAB2	1855921	1844272	9606.ENSP00000362608	9606.ENSP00000254101	0	0	0	0	0.059	0.471	0	0.277	0.608
SERPINA1	CRP	1853254	1844348	9606.ENSP00000348068	9606.ENSP00000255030	0	0	0	0	0.106	0	0	0.579	0.607
PNP	AHCY	1854141	1842666	9606.ENSP00000354532	9606.ENSP00000217426	0.309	0	0	0	0	0	0	0.446	0.601
NAE1	PAPSS1	1847257	1845706	9606.ENSP00000290810	9606.ENSP00000265174	0.16	0	0	0	0.126	0.157	0.417	0.065	0.601
FHIT	RNF139	1852550	1848594	9606.ENSP00000342087	9606.ENSP00000304051	0	0	0	0	0.054	0	0	0.595	0.6
ABL1	CDH1	1855665	1844988	9606.ENSP00000361423	9606.ENSP00000261769	0	0	0	0	0	0.046	0	0.598	0.6
CDKN2A	FGFR3	1859838	1852258	9606.ENSP00000394932	9606.ENSP00000339824	0.048	0	0	0	0.054	0.17	0	0.527	0.599
TXNDC5	VCP	1857091	1853766	9606.ENSP00000369081	9606.ENSP00000351777	0	0	0	0	0.055	0.542	0	0.148	0.599
FXYD5	COX7A1	1852792	1847387	9606.ENSP00000344254	9606.ENSP00000292907	0	0	0	0	0	0	0	0.599	0.599
VEGFA	DNMT1	1855611	1853859	9606.ENSP00000361125	9606.ENSP00000352516	0	0	0	0	0	0	0	0.598	0.598
ADRBK1	PIK3CA	1849510	1845446	9606.ENSP00000312262	9606.ENSP00000263967	0	0	0	0	0	0.086	0	0.577	0.597
DIRC3	DIRC1	1859427	1849012	9606.ENSP00000389455	9606.ENSP00000307860	0	0	0	0	0	0	0	0.597	0.597
RAD51	CAT	1857551	1843587	9606.ENSP00000372088	9606.ENSP00000241052	0	0	0	0	0	0	0	0.595	0.595
AKT1	HSPA8	1846136	1843112	9606.ENSP00000270202	9606.ENSP00000227378	0	0	0	0	0	0.175	0	0.528	0.594
ANKRD11	TP53	1848233	1846083	9606.ENSP00000301030	9606.ENSP00000269305	0	0	0	0	0	0	0	0.592	0.592
TKT	AK2	1860530	1853107	9606.ENSP00000405455	9606.ENSP00000346921	0	0	0	0	0.12	0.417	0	0.268	0.592
BRAF	PIK3CA	1847131	1845446	9606.ENSP00000288602	9606.ENSP00000263967	0	0	0	0	0.226	0	0	0.494	0.592
PTEN	RET	1855586	1853238	9606.ENSP00000361021	9606.ENSP00000347942	0	0	0	0	0	0.17	0	0.528	0.591
MUC16	LGALS3	1858543	1844285	9606.ENSP00000381008	9606.ENSP00000254301	0	0	0	0	0	0	0	0.591	0.591
MT-CO2	SLC25A4	1854241	1846728	9606.ENSP00000354876	9606.ENSP00000281456	0	0	0	0	0.055	0.178	0	0.516	0.591
NDUFA13	COX7C	1861604	1843871	9606.ENSP00000423673	9606.ENSP00000247655	0	0	0	0	0.539	0	0	0.148	0.59
CDKN2A	CAT	1859838	1843587	9606.ENSP00000394932	9606.ENSP00000241052	0.309	0	0	0	0.093	0	0	0.396	0.588
WARS	CCT3	1853177	1847605	9606.ENSP00000347495	9606.ENSP00000295688	0	0	0	0	0.182	0.45	0	0.155	0.587
IL10	ABCA1	1860958	1856172	9606.ENSP00000412237	9606.ENSP00000363868	0	0	0	0	0	0	0	0.587	0.587
PTEN	MLH1	1855586	1843304	9606.ENSP00000361021	9606.ENSP00000231790	0	0	0	0	0.073	0.138	0	0.523	0.585
HRAS	SULT2B1	1849235	1842398	9606.ENSP00000309845	9606.ENSP00000201586	0	0	0	0	0	0	0	0.584	0.584
BRAF	AKT1	1847131	1846136	9606.ENSP00000288602	9606.ENSP00000270202	0	0	0	0.637	0.057	0.425	0	0.732	0.583
RFWD3	TP53	1854110	1846083	9606.ENSP00000354361	9606.ENSP00000269305	0	0	0	0	0	0.285	0	0.441	0.583
AK1	EEF2	1855840	1849021	9606.ENSP00000362249	9606.ENSP00000307940	0.309	0	0	0	0.182	0	0	0.321	0.583
CDH1	MLH1	1844988	1843304	9606.ENSP00000261769	9606.ENSP00000231790	0	0	0	0	0.053	0	0	0.577	0.582
POLE3	DCUN1D1	1856055	1847378	9606.ENSP00000363284	9606.ENSP00000292782	0	0	0	0	0	0.567	0	0.07	0.58
NDUFA13	COX4I1	1861604	1844229	9606.ENSP00000423673	9606.ENSP00000253452	0	0	0	0	0.489	0	0	0.21	0.579
PTEN	HSPA8	1855586	1843112	9606.ENSP00000361021	9606.ENSP00000227378	0	0	0	0	0.044	0.478	0	0.223	0.579
PIK3CA	HSPA8	1845446	1843112	9606.ENSP00000263967	9606.ENSP00000227378	0	0	0	0	0	0.054	0	0.573	0.579
CTNNB1	PTPRU	1852818	1851782	9606.ENSP00000344456	9606.ENSP00000334941	0	0	0	0	0.054	0.376	0	0.344	0.579
BRCA1	CTNNB1	1861387	1852818	9606.ENSP00000418960	9606.ENSP00000344456	0	0	0	0	0	0.36	0	0.368	0.578
VEGFA	ANXA1	1855611	1844509	9606.ENSP00000361125	9606.ENSP00000257497	0	0	0	0	0	0	0	0.577	0.577
ADA	VEGFA	1855776	1855611	9606.ENSP00000361965	9606.ENSP00000361125	0	0	0	0	0	0	0	0.577	0.577
PDE4D	PRKAR2B	1852945	1845791	9606.ENSP00000345502	9606.ENSP00000265717	0	0	0	0	0.153	0	0	0.52	0.576
PDE4D	ADCY1	1852945	1847854	9606.ENSP00000345502	9606.ENSP00000297323	0	0	0	0	0.207	0.17	0	0.408	0.576
EEF2	TP53	1849021	1846083	9606.ENSP00000307940	9606.ENSP00000269305	0	0	0	0	0	0.36	0	0.365	0.576
RPSA	SLC25A4	1853012	1846728	9606.ENSP00000346067	9606.ENSP00000281456	0	0	0	0	0.169	0.503	0	0.055	0.576
VEGFA	ADK	1855611	1847021	9606.ENSP00000361125	9606.ENSP00000286621	0	0	0	0	0	0	0	0.576	0.576
CDKN2A	STK11	1859838	1850687	9606.ENSP00000394932	9606.ENSP00000324856	0.048	0	0	0	0.056	0.17	0	0.497	0.575
PIM1	TP53	1855921	1846083	9606.ENSP00000362608	9606.ENSP00000269305	0	0	0	0	0	0.063	0	0.565	0.575
PTCH1	TP53	1851463	1846083	9606.ENSP00000332353	9606.ENSP00000269305	0	0	0	0	0	0	0	0.574	0.574
BRCA1	HRAS	1861387	1849235	9606.ENSP00000418960	9606.ENSP00000309845	0	0	0	0	0	0	0	0.574	0.574
ACVRL1	AMHR2	1857773	1844545	9606.ENSP00000373574	9606.ENSP00000257863	0	0	0	0.693	0.066	0.497	0	0.43	0.571
PPP1CC	YWHAE	1851808	1845524	9606.ENSP00000335084	9606.ENSP00000264335	0	0	0	0	0.113	0.502	0	0.102	0.568
FHIT	AKT1	1852550	1846136	9606.ENSP00000342087	9606.ENSP00000270202	0	0	0	0	0	0	0	0.568	0.568
ADORA3	AKT1	1855085	1846136	9606.ENSP00000358730	9606.ENSP00000270202	0	0	0	0	0	0.052	0	0.562	0.567
POLE3	MLH1	1856055	1843304	9606.ENSP00000363284	9606.ENSP00000231790	0	0	0	0	0.098	0	0.54	0	0.567
CDKN2A	MET	1859838	1849944	9606.ENSP00000394932	9606.ENSP00000317272	0.048	0	0	0	0.054	0.17	0	0.489	0.567
PDE4B	PRKAR2B	1851429	1845791	9606.ENSP00000332116	9606.ENSP00000265717	0	0	0	0	0.153	0	0	0.51	0.567
ABCA1	PIK3CA	1856172	1845446	9606.ENSP00000363868	9606.ENSP00000263967	0	0	0	0	0.107	0.054	0	0.527	0.566
PDE4B	ADCY1	1851429	1847854	9606.ENSP00000332116	9606.ENSP00000297323	0	0	0	0	0.207	0.17	0	0.393	0.566
POLE	TP53	1850463	1846083	9606.ENSP00000322570	9606.ENSP00000269305	0	0	0	0	0.054	0	0	0.56	0.566
NDE1	STARD9	1852988	1847246	9606.ENSP00000345892	9606.ENSP00000290607	0	0	0	0	0.054	0	0.54	0.081	0.565
SOAT2	MTTP	1848301	1845764	9606.ENSP00000301466	9606.ENSP00000265517	0	0	0	0	0.153	0	0	0.507	0.565
CTNNB1	ABCB1	1852818	1845794	9606.ENSP00000344456	9606.ENSP00000265724	0	0	0	0	0	0	0	0.563	0.563
ABL1	CAT	1855665	1843587	9606.ENSP00000361423	9606.ENSP00000241052	0.05	0	0	0	0.055	0.38	0	0.306	0.563
CDH1	VHL	1844988	1844441	9606.ENSP00000261769	9606.ENSP00000256474	0	0	0	0	0	0.36	0	0.345	0.563
CREB1	HRAS	1859295	1849235	9606.ENSP00000387699	9606.ENSP00000309845	0	0	0	0	0	0	0	0.563	0.563
DIEXF	TRMT1L	1861391	1854608	9606.ENSP00000419005	9606.ENSP00000356476	0	0	0	0	0.563	0	0	0	0.563
RAD51	PIK3CA	1857551	1845446	9606.ENSP00000372088	9606.ENSP00000263967	0	0	0	0	0.053	0.294	0	0.4	0.563
CDKN2A	CTNNB1	1859838	1852818	9606.ENSP00000394932	9606.ENSP00000344456	0	0	0	0	0	0.047	0	0.559	0.562
KIF2C	STARD9	1855643	1847246	9606.ENSP00000361298	9606.ENSP00000290607	0	0	0	0.657	0.054	0	0.54	0.143	0.562
TKT	VCP	1860530	1853766	9606.ENSP00000405455	9606.ENSP00000351777	0.081	0	0	0	0.087	0.424	0	0.197	0.561
CDKN2A	VHL	1859838	1844441	9606.ENSP00000394932	9606.ENSP00000256474	0	0	0	0	0.068	0.376	0	0.305	0.561
AK1	PAPSS1	1855840	1845706	9606.ENSP00000362249	9606.ENSP00000265174	0.073	0	0	0	0.126	0	0	0.501	0.56
RRM1	KIAA0101	1848209	1848123	9606.ENSP00000300738	9606.ENSP00000300035	0	0	0	0	0.51	0	0	0.138	0.559
BAG1	MET	1861489	1849944	9606.ENSP00000420514	9606.ENSP00000317272	0	0	0	0	0	0.36	0	0.339	0.559
APAF1	PIK3CA	1862487	1845446	9606.ENSP00000448165	9606.ENSP00000263967	0	0	0	0	0.222	0.062	0	0.443	0.558
RRM1	CDK15	1848209	1844834	9606.ENSP00000300738	9606.ENSP00000260967	0	0	0	0	0.294	0.047	0	0.397	0.558
ACVR1B	AMHR2	1862229	1844545	9606.ENSP00000442656	9606.ENSP00000257863	0	0	0	0.709	0.066	0.497	0	0.365	0.558
HNF1A	CRP	1844515	1844348	9606.ENSP00000257555	9606.ENSP00000255030	0	0	0	0	0	0	0	0.557	0.557
FAS	IFNA1	1853242	1846520	9606.ENSP00000347979	9606.ENSP00000276927	0	0	0	0	0	0	0	0.557	0.557
POLE4	MLH1	1861462	1843304	9606.ENSP00000420176	9606.ENSP00000231790	0	0	0	0	0.054	0	0.54	0.058	0.554
ABL1	YWHAE	1855665	1845524	9606.ENSP00000361423	9606.ENSP00000264335	0	0	0	0	0.051	0.527	0	0.082	0.552
PTEN	RRM1	1855586	1848209	9606.ENSP00000361021	9606.ENSP00000300738	0	0	0	0	0.099	0	0	0.522	0.551
TFDP3	CTAG1B	1859036	1851491	9606.ENSP00000385461	9606.ENSP00000332602	0	0	0	0	0.221	0	0	0.447	0.551
PAPSS1	HSPA8	1845706	1843112	9606.ENSP00000265174	9606.ENSP00000227378	0	0	0	0	0.12	0.051	0	0.504	0.55
EPHB2	TP53	1856154	1846083	9606.ENSP00000363763	9606.ENSP00000269305	0	0	0	0	0	0.401	0	0.278	0.55
FAS	LGALS3	1853242	1844285	9606.ENSP00000347979	9606.ENSP00000254301	0	0	0	0	0	0	0	0.549	0.549
ADA	NOC2L	1855776	1850000	9606.ENSP00000361965	9606.ENSP00000317992	0	0	0	0	0.397	0	0	0.28	0.547
PTEN	CRP	1855586	1844348	9606.ENSP00000361021	9606.ENSP00000255030	0	0	0	0	0	0	0	0.547	0.547
PRMT3	NOC2L	1851405	1850000	9606.ENSP00000331879	9606.ENSP00000317992	0	0	0	0	0.546	0	0	0	0.546
AK2	PAPSS1	1853107	1845706	9606.ENSP00000346921	9606.ENSP00000265174	0.073	0	0	0	0.126	0	0	0.485	0.546
POLA1	CAT	1856974	1843587	9606.ENSP00000368349	9606.ENSP00000241052	0	0	0	0	0	0	0	0.545	0.545
SIRT3	ACSS2	1857564	1844221	9606.ENSP00000372191	9606.ENSP00000253382	0	0	0	0	0	0.044	0	0.544	0.545
TXNDC5	EEF2	1857091	1849021	9606.ENSP00000369081	9606.ENSP00000307940	0	0	0	0	0.073	0.386	0	0.264	0.544
CREB1	SIRT3	1859295	1857564	9606.ENSP00000387699	9606.ENSP00000372191	0	0	0	0	0.053	0	0	0.537	0.544
PIK3CA	ID2	1845446	1843383	9606.ENSP00000263967	9606.ENSP00000234091	0	0	0	0	0	0	0	0.543	0.543
VCP	PRMT3	1853766	1851405	9606.ENSP00000351777	9606.ENSP00000331879	0	0	0	0	0.098	0.511	0	0.045	0.543
CAT	HSPA8	1843587	1843112	9606.ENSP00000241052	9606.ENSP00000227378	0	0	0	0	0.056	0	0	0.536	0.543
EEF2	AK8	1849021	1847970	9606.ENSP00000307940	9606.ENSP00000298545	0.309	0	0	0	0.182	0	0	0.255	0.542
AK8	PAPSS1	1847970	1845706	9606.ENSP00000298545	9606.ENSP00000265174	0.073	0	0	0	0.126	0	0	0.481	0.542
CDK15	GALK1	1844834	1843038	9606.ENSP00000260967	9606.ENSP00000225614	0	0	0	0	0.053	0.293	0	0.371	0.542
NUDT5	RRM1	1861432	1848209	9606.ENSP00000419628	9606.ENSP00000300738	0	0	0	0	0.114	0.048	0.435	0.154	0.542
AK2	EEF2	1853107	1849021	9606.ENSP00000346921	9606.ENSP00000307940	0.309	0	0	0	0.182	0	0	0.255	0.542
APAF1	SETD7	1862487	1846356	9606.ENSP00000448165	9606.ENSP00000274031	0	0	0	0	0.072	0.389	0	0.256	0.541
SIRT5	CLPB	1857002	1847462	9606.ENSP00000368552	9606.ENSP00000294053	0.072	0	0	0	0.051	0.518	0	0.046	0.54
DCTD	RRM1	1853462	1848209	9606.ENSP00000349576	9606.ENSP00000300738	0.064	0	0	0	0.122	0	0.17	0.405	0.539
CRP	CAT	1844348	1843587	9606.ENSP00000255030	9606.ENSP00000241052	0	0	0	0	0.054	0	0	0.533	0.539
SIRT3	CLPB	1857564	1847462	9606.ENSP00000372191	9606.ENSP00000294053	0.072	0	0	0	0.051	0.518	0	0	0.538
BRCA1	PIK3CA	1861387	1845446	9606.ENSP00000418960	9606.ENSP00000263967	0	0	0	0	0.057	0	0	0.531	0.538
FBP1	UCK2	1856276	1854680	9606.ENSP00000364475	9606.ENSP00000356853	0	0	0	0	0.133	0	0	0.49	0.538
COX7B2	COX5B	1848792	1844605	9606.ENSP00000305964	9606.ENSP00000258424	0	0	0	0	0.27	0.376	0	0.066	0.537
VEGFA	RET	1855611	1853238	9606.ENSP00000361125	9606.ENSP00000347942	0	0	0	0	0.05	0.098	0	0.504	0.537
ARID1A	MARCO	1850249	1850096	9606.ENSP00000320485	9606.ENSP00000318916	0	0	0	0	0	0	0	0.537	0.537
IL10	CAT	1860958	1843587	9606.ENSP00000412237	9606.ENSP00000241052	0	0	0	0	0	0	0	0.537	0.537
MET	PRCC	1849944	1846199	9606.ENSP00000317272	9606.ENSP00000271526	0	0	0	0	0	0	0	0.536	0.536
CCT3	CLPB	1847605	1847462	9606.ENSP00000295688	9606.ENSP00000294053	0	0	0	0	0.354	0.054	0	0.302	0.536
RPSA	HSPA8	1853012	1843112	9606.ENSP00000346067	9606.ENSP00000227378	0.104	0	0	0	0.237	0.053	0	0.367	0.535
COX5A	COX7A1	1849982	1847387	9606.ENSP00000317780	9606.ENSP00000292907	0	0	0	0	0.053	0	0	0.528	0.535
RET	TP53	1853238	1846083	9606.ENSP00000347942	9606.ENSP00000269305	0	0	0	0	0	0.063	0	0.525	0.535
COASY	ACSS2	1863897	1844221	9606.ENSP00000464814	9606.ENSP00000253382	0.052	0	0	0	0	0	0	0.529	0.534
TKT	AHCY	1860530	1842666	9606.ENSP00000405455	9606.ENSP00000217426	0.074	0	0	0	0.247	0	0	0.384	0.534
VEGFA	CAT	1855611	1843587	9606.ENSP00000361125	9606.ENSP00000241052	0	0	0	0	0	0	0	0.532	0.532
STK11	MLH1	1850687	1843304	9606.ENSP00000324856	9606.ENSP00000231790	0.064	0	0	0	0.053	0	0	0.514	0.531
SART1	SART3	1849296	1843135	9606.ENSP00000310448	9606.ENSP00000228284	0	0	0	0	0.055	0	0	0.524	0.531
PTEN	CRTC1	1855586	1852882	9606.ENSP00000361021	9606.ENSP00000345001	0	0	0	0	0	0	0	0.53	0.53
CTNNB1	SETD7	1852818	1846356	9606.ENSP00000344456	9606.ENSP00000274031	0	0	0	0	0.054	0.11	0	0.487	0.53
BRCA1	KRAS	1861387	1844404	9606.ENSP00000418960	9606.ENSP00000256078	0	0	0	0	0	0	0	0.53	0.53
ARID1A	CDH1	1850249	1844988	9606.ENSP00000320485	9606.ENSP00000261769	0	0	0	0	0	0	0	0.53	0.53
PRCC	VHL	1846199	1844441	9606.ENSP00000271526	9606.ENSP00000256474	0	0	0	0	0	0	0	0.529	0.529
IL10	PPARG	1860958	1847090	9606.ENSP00000412237	9606.ENSP00000287820	0	0	0	0	0	0	0	0.529	0.529
NDE1	MST1R	1852988	1847736	9606.ENSP00000345892	9606.ENSP00000296474	0	0	0	0	0	0	0	0.529	0.529
CTNNB1	FHIT	1852818	1852550	9606.ENSP00000344456	9606.ENSP00000342087	0.047	0	0	0	0.059	0.36	0	0.274	0.528
DIRC3	DIRC2	1859427	1844845	9606.ENSP00000389455	9606.ENSP00000261038	0	0	0	0	0	0	0	0.528	0.528
HINT1	HSPA8	1848614	1843112	9606.ENSP00000304229	9606.ENSP00000227378	0.309	0	0	0	0.247	0.065	0	0.142	0.527
APAF1	PTEN	1862487	1855586	9606.ENSP00000448165	9606.ENSP00000361021	0	0	0	0	0.251	0	0	0.394	0.527
RPSA	CCT3	1853012	1847605	9606.ENSP00000346067	9606.ENSP00000295688	0	0	0	0	0.277	0.162	0	0.28	0.526
BRCA1	SMAD4	1861387	1852473	9606.ENSP00000418960	9606.ENSP00000341551	0	0	0	0	0	0.285	0	0.364	0.525
PPARG	PIK3CA	1847090	1845446	9606.ENSP00000287820	9606.ENSP00000263967	0	0	0	0	0	0	0	0.525	0.525
ADA	MARCO	1855776	1850096	9606.ENSP00000361965	9606.ENSP00000318916	0	0	0	0	0	0	0	0.524	0.524
PTEN	PRKAA1	1855586	1853021	9606.ENSP00000361021	9606.ENSP00000346148	0	0	0	0	0.091	0.169	0	0.42	0.524
EEF2	AKT1	1849021	1846136	9606.ENSP00000307940	9606.ENSP00000270202	0	0	0	0	0.054	0.144	0	0.459	0.524
RAD51	CLPB	1857551	1847462	9606.ENSP00000372088	9606.ENSP00000294053	0.064	0	0	0	0.053	0	0	0.505	0.523
CTNNB1	MLH1	1852818	1843304	9606.ENSP00000344456	9606.ENSP00000231790	0.048	0	0	0	0.08	0	0	0.499	0.523
YY1AP1	SULT2B1	1854782	1842398	9606.ENSP00000357323	9606.ENSP00000201586	0	0	0	0	0	0	0	0.523	0.523
EPHB2	VEGFA	1856154	1855611	9606.ENSP00000363763	9606.ENSP00000361125	0	0	0	0	0	0.382	0	0.258	0.522
NUDT5	RRM2	1861432	1854033	9606.ENSP00000419628	9606.ENSP00000353770	0	0	0	0	0.102	0.047	0.435	0.128	0.522
BRCA1	DNMT1	1861387	1853859	9606.ENSP00000418960	9606.ENSP00000352516	0	0	0	0	0.091	0.134	0	0.441	0.522
STK11	FLCN	1850687	1846946	9606.ENSP00000324856	9606.ENSP00000285071	0	0	0	0	0.053	0	0	0.516	0.522
PRMT1	KRAS	1860583	1844404	9606.ENSP00000406162	9606.ENSP00000256078	0	0	0	0	0.087	0.063	0	0.486	0.522
FECH	AFG3L2	1857583	1846068	9606.ENSP00000372326	9606.ENSP00000269143	0	0	0	0	0.059	0	0	0.511	0.521
VEGFA	RRM2	1855611	1854033	9606.ENSP00000361125	9606.ENSP00000353770	0	0	0	0	0	0	0	0.52	0.52
ARAF	PIK3CA	1856599	1845446	9606.ENSP00000366244	9606.ENSP00000263967	0	0	0	0	0.054	0	0	0.513	0.519
ACSL1	ACSS2	1846727	1844221	9606.ENSP00000281455	9606.ENSP00000253382	0	0	0	0	0.1	0	0	0.487	0.519
FHIT	MLH1	1852550	1843304	9606.ENSP00000342087	9606.ENSP00000231790	0	0	0	0	0	0	0	0.518	0.518
SIRT5	ACSS2	1857002	1844221	9606.ENSP00000368552	9606.ENSP00000253382	0	0	0	0	0.052	0.047	0	0.509	0.518
RRM2	DNMT1	1854033	1853859	9606.ENSP00000353770	9606.ENSP00000352516	0.048	0	0	0	0.312	0	0	0.322	0.518
VEGFA	MST1R	1855611	1847736	9606.ENSP00000361125	9606.ENSP00000296474	0	0	0	0	0	0	0	0.518	0.518
VDR	BRCA1	1862386	1861387	9606.ENSP00000447173	9606.ENSP00000418960	0	0	0	0	0	0.36	0	0.277	0.517
STK11	EEF2	1850687	1849021	9606.ENSP00000324856	9606.ENSP00000307940	0	0	0	0	0.072	0.17	0	0.423	0.517
FGFR3	CLPB	1852258	1847462	9606.ENSP00000339824	9606.ENSP00000294053	0.097	0	0	0	0.056	0.042	0	0.479	0.517
TNK2	TP53	1857453	1846083	9606.ENSP00000371341	9606.ENSP00000269305	0	0	0	0	0	0.36	0	0.277	0.517
FGFR3	TP53	1852258	1846083	9606.ENSP00000339824	9606.ENSP00000269305	0	0	0	0	0	0.063	0	0.505	0.516
AKT1	CRP	1846136	1844348	9606.ENSP00000270202	9606.ENSP00000255030	0	0	0	0	0	0	0	0.515	0.515
POLE	RRM2B	1850463	1844085	9606.ENSP00000322570	9606.ENSP00000251810	0	0	0	0	0.226	0.184	0	0.294	0.515
NR1I3	ABCB1	1854699	1845794	9606.ENSP00000356958	9606.ENSP00000265724	0	0	0	0	0	0	0	0.515	0.515
CREB1	HSPA8	1859295	1843112	9606.ENSP00000387699	9606.ENSP00000227378	0	0	0	0	0.049	0.11	0	0.472	0.514
CREB1	POLE	1859295	1850463	9606.ENSP00000387699	9606.ENSP00000322570	0	0	0	0	0.053	0	0	0.508	0.514
POLE3	DCUN1D3	1856055	1850151	9606.ENSP00000363284	9606.ENSP00000319482	0	0	0	0	0	0.513	0	0	0.513
RRM2	POLE	1854033	1850463	9606.ENSP00000353770	9606.ENSP00000322570	0	0	0	0	0.226	0.184	0	0.292	0.513
POLE3	DCUN1D5	1856055	1844768	9606.ENSP00000363284	9606.ENSP00000260247	0	0	0	0	0	0.513	0	0	0.513
PIM1	SERPINA1	1855921	1853254	9606.ENSP00000362608	9606.ENSP00000348068	0	0	0	0	0.044	0.07	0	0.495	0.512
PTEN	FGFR3	1855586	1852258	9606.ENSP00000361021	9606.ENSP00000339824	0	0	0	0	0	0.17	0	0.435	0.511
POLA1	CDK15	1856974	1844834	9606.ENSP00000368349	9606.ENSP00000260967	0	0	0	0	0.125	0.12	0	0.416	0.511
CREB1	SMAD4	1859295	1852473	9606.ENSP00000387699	9606.ENSP00000341551	0	0	0	0	0.191	0	0	0.418	0.51
TKT	FHIT	1860530	1852550	9606.ENSP00000405455	9606.ENSP00000342087	0	0	0	0	0	0.07	0	0.494	0.51
UCK2	AK2	1854680	1853107	9606.ENSP00000356853	9606.ENSP00000346921	0	0	0	0	0.111	0.043	0	0.469	0.509
VEGFA	MT-CO2	1855611	1854241	9606.ENSP00000361125	9606.ENSP00000354876	0	0	0	0	0	0	0	0.509	0.509
VEGFA	PTK7	1855611	1843252	9606.ENSP00000361125	9606.ENSP00000230419	0	0	0	0	0	0.098	0	0.478	0.509
PTEN	BRAF	1855586	1847131	9606.ENSP00000361021	9606.ENSP00000288602	0	0	0	0	0.19	0.173	0	0.324	0.508
ABL1	LGALS3	1855665	1844285	9606.ENSP00000361423	9606.ENSP00000254301	0	0	0	0	0	0	0	0.508	0.508
CREB1	POLB	1859295	1845748	9606.ENSP00000387699	9606.ENSP00000265421	0	0	0	0	0.075	0	0	0.489	0.508
APAF1	COX4I1	1862487	1844229	9606.ENSP00000448165	9606.ENSP00000253452	0	0	0	0	0.054	0	0	0.5	0.506
RET	VHL	1853238	1844441	9606.ENSP00000347942	9606.ENSP00000256474	0	0	0	0	0	0	0	0.505	0.505
ABCA1	SOAT2	1856172	1848301	9606.ENSP00000363868	9606.ENSP00000301466	0	0	0	0	0	0.065	0	0.492	0.505
TKT	AKT1	1860530	1846136	9606.ENSP00000405455	9606.ENSP00000270202	0	0	0	0	0	0	0	0.505	0.505
IGLL5	PCMT1	1861867	1854577	9606.ENSP00000431254	9606.ENSP00000356348	0	0	0	0	0	0	0	0.504	0.504
BRCA1	CDH1	1861387	1844988	9606.ENSP00000418960	9606.ENSP00000261769	0	0	0	0	0	0	0	0.504	0.504
VCP	CCT3	1853766	1847605	9606.ENSP00000351777	9606.ENSP00000295688	0	0	0.203	0	0.215	0.099	0	0.223	0.504
ABCA1	MTTP	1856172	1845764	9606.ENSP00000363868	9606.ENSP00000265517	0	0	0	0	0	0	0	0.504	0.504
NDE1	SLC5A5	1852988	1842895	9606.ENSP00000345892	9606.ENSP00000222248	0	0	0	0	0	0	0	0.504	0.504
ABCC8	NDE1	1857861	1852988	9606.ENSP00000374467	9606.ENSP00000345892	0	0	0	0	0	0	0	0.503	0.503
CTNNB1	SOST	1852818	1848323	9606.ENSP00000344456	9606.ENSP00000301691	0	0	0	0	0	0	0	0.503	0.503
ADA	ADORA3	1855776	1855085	9606.ENSP00000361965	9606.ENSP00000358730	0	0	0	0	0	0	0	0.503	0.503
UCK2	DCTD	1854680	1853462	9606.ENSP00000356853	9606.ENSP00000349576	0.057	0	0	0	0.05	0	0.435	0.135	0.503
CTNNB1	VHL	1852818	1844441	9606.ENSP00000344456	9606.ENSP00000256474	0	0	0	0	0	0.36	0	0.255	0.503
RET	SLC5A5	1853238	1842895	9606.ENSP00000347942	9606.ENSP00000222248	0	0	0	0	0	0	0	0.502	0.502
ADA	CTNNB1	1855776	1852818	9606.ENSP00000361965	9606.ENSP00000344456	0.309	0	0	0	0.182	0	0	0.19	0.502
EPHB2	CTNNB1	1856154	1852818	9606.ENSP00000363763	9606.ENSP00000344456	0	0	0	0	0.067	0.17	0	0.406	0.5
PTPRU	CDH1	1851782	1844988	9606.ENSP00000334941	9606.ENSP00000261769	0	0	0	0	0	0.169	0	0.423	0.5
FECH	HEMK1	1857583	1843324	9606.ENSP00000372326	9606.ENSP00000232854	0.045	0	0	0	0	0	0.435	0.147	0.499
PRKAA1	PPARG	1853021	1847090	9606.ENSP00000346148	9606.ENSP00000287820	0	0	0	0	0	0.36	0	0.25	0.499
POLE	CAT	1850463	1843587	9606.ENSP00000322570	9606.ENSP00000241052	0	0	0	0	0	0	0	0.499	0.499
ACVRL1	VEGFA	1857773	1855611	9606.ENSP00000373574	9606.ENSP00000361125	0	0	0	0	0	0	0	0.499	0.499
ALDOA	COX4I1	1851945	1844229	9606.ENSP00000336927	9606.ENSP00000253452	0	0	0	0	0.141	0.417	0	0.08	0.499
CTSA	NAE1	1855691	1847257	9606.ENSP00000361562	9606.ENSP00000290810	0	0	0	0	0.048	0	0	0.493	0.497
CTNNB1	PTCH1	1852818	1851463	9606.ENSP00000344456	9606.ENSP00000332353	0	0	0	0	0.054	0	0	0.49	0.497
TNK2	AKT1	1857453	1846136	9606.ENSP00000371341	9606.ENSP00000270202	0	0	0	0.626	0.054	0.36	0	0.56	0.496
CTNNB1	STK11	1852818	1850687	9606.ENSP00000344456	9606.ENSP00000324856	0	0	0	0	0	0.17	0	0.418	0.496
NUDT5	RRM2B	1861432	1844085	9606.ENSP00000419628	9606.ENSP00000251810	0	0	0	0	0.055	0.047	0.435	0.128	0.496
IL10	PDE4B	1860958	1851429	9606.ENSP00000412237	9606.ENSP00000332116	0	0	0	0	0	0	0	0.495	0.496
EPHB2	PTEN	1856154	1855586	9606.ENSP00000363763	9606.ENSP00000361021	0	0	0	0	0.09	0.295	0	0.277	0.495
NAGA	GALK1	1858390	1843038	9606.ENSP00000379680	9606.ENSP00000225614	0	0	0	0	0.054	0	0.435	0.131	0.495
PIK3CA	CAT	1845446	1843587	9606.ENSP00000263967	9606.ENSP00000241052	0	0	0	0	0	0	0	0.494	0.494
POLA1	POLB	1856974	1845748	9606.ENSP00000368349	9606.ENSP00000265421	0	0	0	0	0.073	0.099	0	0.443	0.494
YWHAE	HSPA8	1845524	1843112	9606.ENSP00000264335	9606.ENSP00000227378	0	0	0	0	0.067	0.251	0	0.332	0.493
PRMT1	POLB	1860583	1845748	9606.ENSP00000406162	9606.ENSP00000265421	0	0	0	0	0.056	0	0	0.484	0.493
RRM2	DCTD	1854033	1853462	9606.ENSP00000353770	9606.ENSP00000349576	0.051	0	0	0	0.234	0	0	0.359	0.493
STK11	AKT1	1850687	1846136	9606.ENSP00000324856	9606.ENSP00000270202	0	0	0.357	0.659	0.103	0.182	0	0.748	0.492
AK2	AFG3L2	1853107	1846068	9606.ENSP00000346921	9606.ENSP00000269143	0	0	0	0	0.081	0.417	0	0.127	0.492
CTNNB1	HSPA8	1852818	1843112	9606.ENSP00000344456	9606.ENSP00000227378	0	0	0	0	0.052	0.359	0	0.23	0.492
FHIT	HRAS	1852550	1849235	9606.ENSP00000342087	9606.ENSP00000309845	0	0	0	0	0	0	0	0.492	0.491
AKT1	VHL	1846136	1844441	9606.ENSP00000270202	9606.ENSP00000256474	0	0	0	0	0	0	0	0.491	0.491
SIRT3	PRKAA1	1857564	1853021	9606.ENSP00000372191	9606.ENSP00000346148	0	0	0	0	0	0	0	0.49	0.491
DIEXF	PRMT3	1861391	1851405	9606.ENSP00000419005	9606.ENSP00000331879	0	0	0	0	0.487	0	0	0.048	0.491
MYCL1	TP53	1858482	1846083	9606.ENSP00000380494	9606.ENSP00000269305	0	0	0	0	0	0	0	0.492	0.491
CDKN2A	RET	1859838	1853238	9606.ENSP00000394932	9606.ENSP00000347942	0.048	0	0	0	0.054	0.17	0	0.399	0.49
EEF2	CCT3	1849021	1847605	9606.ENSP00000307940	9606.ENSP00000295688	0	0	0	0	0.275	0.087	0	0.292	0.49
BRCA1	STK11	1861387	1850687	9606.ENSP00000418960	9606.ENSP00000324856	0	0	0	0	0.042	0	0	0.49	0.49
AHCY	NME1	1842666	1842174	9606.ENSP00000217426	9606.ENSP00000013034	0.073	0	0	0	0.365	0	0	0.202	0.489
APAF1	CDKN2A	1862487	1859838	9606.ENSP00000448165	9606.ENSP00000394932	0	0	0	0	0.053	0.103	0	0.446	0.489
DIRC1	DIRC2	1849012	1844845	9606.ENSP00000307860	9606.ENSP00000261038	0	0	0	0	0	0	0	0.49	0.489
COASY	RRM1	1863897	1848209	9606.ENSP00000464814	9606.ENSP00000300738	0	0	0	0	0.055	0	0.435	0.121	0.489
EPHB2	RET	1856154	1853238	9606.ENSP00000363763	9606.ENSP00000347942	0	0	0	0.646	0.052	0.404	0	0.396	0.489
CREB1	PPARG	1859295	1847090	9606.ENSP00000387699	9606.ENSP00000287820	0	0	0	0	0	0.044	0	0.488	0.489
BCAS1	SARNP	1858349	1852022	9606.ENSP00000379290	9606.ENSP00000337632	0	0	0	0	0	0	0	0.488	0.487
BRCA1	RRM1	1861387	1848209	9606.ENSP00000418960	9606.ENSP00000300738	0	0	0	0	0.227	0	0	0.364	0.487
DIRC1	RNF139	1849012	1848594	9606.ENSP00000307860	9606.ENSP00000304051	0	0	0	0	0	0	0	0.488	0.487
POLA1	MLH1	1856974	1843304	9606.ENSP00000368349	9606.ENSP00000231790	0	0	0	0	0.284	0.12	0	0.25	0.487
PIGR	SULT2B1	1853366	1842398	9606.ENSP00000348888	9606.ENSP00000201586	0	0	0	0	0	0	0	0.487	0.487
BRCA1	RRM2	1861387	1854033	9606.ENSP00000418960	9606.ENSP00000353770	0	0	0	0	0.355	0	0	0.236	0.486
PPP1CC	AKT1	1851808	1846136	9606.ENSP00000335084	9606.ENSP00000270202	0	0	0	0	0.064	0.119	0	0.426	0.486
RPSA	LGALS3	1853012	1844285	9606.ENSP00000346067	9606.ENSP00000254301	0	0	0	0	0	0	0	0.486	0.485
COX7B2	COX7C	1848792	1843871	9606.ENSP00000305964	9606.ENSP00000247655	0	0	0	0	0.093	0.292	0	0.26	0.483
ABCG1	PPARG	1854276	1847090	9606.ENSP00000354995	9606.ENSP00000287820	0	0	0	0	0	0.066	0	0.47	0.483
CTNNB1	CRP	1852818	1844348	9606.ENSP00000344456	9606.ENSP00000255030	0	0	0	0	0	0	0	0.483	0.483
PPARG	CAT	1847090	1843587	9606.ENSP00000287820	9606.ENSP00000241052	0	0	0	0	0	0	0	0.484	0.483
FAS	CTNNB1	1853242	1852818	9606.ENSP00000347979	9606.ENSP00000344456	0	0	0	0	0	0.387	0	0.191	0.483
FHL2	CDH1	1850494	1844988	9606.ENSP00000322909	9606.ENSP00000261769	0	0	0	0	0	0	0	0.482	0.482
COX7B2	COX6C	1848792	1847885	9606.ENSP00000305964	9606.ENSP00000297564	0	0	0	0	0.107	0.376	0	0.145	0.481
SMAD4	MLH1	1852473	1843304	9606.ENSP00000341551	9606.ENSP00000231790	0	0	0	0	0	0	0	0.481	0.481
NDE1	MARCO	1852988	1850096	9606.ENSP00000345892	9606.ENSP00000318916	0	0	0	0	0	0	0	0.48	0.48
PRKAA1	YWHAE	1853021	1845524	9606.ENSP00000346148	9606.ENSP00000264335	0	0	0	0	0.054	0.42	0	0.127	0.479
RET	TSHR	1853238	1847934	9606.ENSP00000347942	9606.ENSP00000298171	0	0	0	0	0	0	0	0.479	0.479
NDE1	ARID1A	1852988	1850249	9606.ENSP00000345892	9606.ENSP00000320485	0	0	0	0	0	0	0	0.478	0.478
CREB1	KRAS	1859295	1844404	9606.ENSP00000387699	9606.ENSP00000256078	0	0	0	0	0.088	0	0	0.451	0.478
COX7B2	COX7A1	1848792	1847387	9606.ENSP00000305964	9606.ENSP00000292907	0	0	0	0	0.054	0.376	0	0.187	0.478
VEGFA	FAS	1855611	1853242	9606.ENSP00000361125	9606.ENSP00000347979	0	0	0	0	0	0	0	0.476	0.476
ABCC8	MST1R	1857861	1847736	9606.ENSP00000374467	9606.ENSP00000296474	0	0	0	0	0.059	0	0	0.466	0.476
UCK2	ALDOA	1854680	1851945	9606.ENSP00000356853	9606.ENSP00000336927	0	0	0	0	0.129	0	0	0.422	0.475
PEG10	TGFBR2	1861308	1853779	9606.ENSP00000417587	9606.ENSP00000351905	0	0	0	0	0	0.336	0	0.241	0.475
FECH	CAT	1857583	1843587	9606.ENSP00000372326	9606.ENSP00000241052	0.064	0	0	0	0.044	0	0	0.459	0.473
DNMT1	PPP1CC	1853859	1851808	9606.ENSP00000352516	9606.ENSP00000335084	0	0	0	0	0.12	0	0	0.424	0.471
CTNNB1	ACVR1	1852818	1845380	9606.ENSP00000344456	9606.ENSP00000263640	0	0	0	0	0.066	0.293	0	0.262	0.47
PTEN	SALL4	1855586	1842636	9606.ENSP00000361021	9606.ENSP00000217086	0	0	0	0	0	0	0	0.468	0.468
PIM1	ABCB1	1855921	1845794	9606.ENSP00000362608	9606.ENSP00000265724	0.048	0	0	0	0.048	0.395	0	0.144	0.468
ABCC8	RET	1857861	1853238	9606.ENSP00000374467	9606.ENSP00000347942	0.048	0	0	0	0	0.094	0	0.431	0.467
FAS	MET	1853242	1849944	9606.ENSP00000347979	9606.ENSP00000317272	0	0	0	0	0	0.36	0	0.2	0.466
ADA	PRMT3	1855776	1851405	9606.ENSP00000361965	9606.ENSP00000331879	0	0	0	0	0.464	0	0	0.043	0.465
RPSA	CTNNB1	1853012	1852818	9606.ENSP00000346067	9606.ENSP00000344456	0	0	0	0	0.057	0.359	0	0.186	0.465
PRMT1	ADA	1860583	1855776	9606.ENSP00000406162	9606.ENSP00000361965	0	0	0	0	0.464	0	0	0.043	0.465
TXNDC5	CCT3	1857091	1847605	9606.ENSP00000369081	9606.ENSP00000295688	0.057	0	0	0	0.053	0.292	0	0.254	0.465
TNK2	CDH1	1857453	1844988	9606.ENSP00000371341	9606.ENSP00000261769	0	0	0	0	0	0	0	0.465	0.465
FGFR3	HSPA8	1852258	1843112	9606.ENSP00000339824	9606.ENSP00000227378	0	0	0	0	0	0.415	0	0.123	0.465
VCP	HNF1A	1853766	1844515	9606.ENSP00000351777	9606.ENSP00000257555	0	0	0	0	0	0.36	0	0.197	0.464
DIRC3	RNF139	1859427	1848594	9606.ENSP00000389455	9606.ENSP00000304051	0	0	0	0	0	0	0	0.464	0.463
DIEXF	PRMT1	1861391	1860583	9606.ENSP00000419005	9606.ENSP00000406162	0	0	0	0	0.464	0	0	0	0.463
TXNDC5	PAPSS1	1857091	1845706	9606.ENSP00000369081	9606.ENSP00000265174	0	0	0	0	0.052	0.292	0	0.263	0.462
SIRT3	CAT	1857564	1843587	9606.ENSP00000372191	9606.ENSP00000241052	0	0	0	0	0.054	0	0	0.454	0.461
PTEN	VHL	1855586	1844441	9606.ENSP00000361021	9606.ENSP00000256474	0	0	0	0	0	0	0	0.461	0.461
APAF1	BAG1	1862487	1861489	9606.ENSP00000448165	9606.ENSP00000420514	0	0	0	0	0.076	0	0	0.44	0.46
ARAF	FHL2	1856599	1850494	9606.ENSP00000366244	9606.ENSP00000322909	0	0	0	0	0	0	0	0.46	0.46
BRCA1	CREB1	1861387	1859295	9606.ENSP00000418960	9606.ENSP00000387699	0	0	0	0	0	0.285	0	0.277	0.46
TKT	ACSS2	1860530	1844221	9606.ENSP00000405455	9606.ENSP00000253382	0	0	0	0	0.055	0.172	0	0.366	0.46
BCAS2	TP53	1855053	1846083	9606.ENSP00000358554	9606.ENSP00000269305	0	0	0	0	0	0	0	0.459	0.459
GGNBP2	IFNA1	1848976	1846520	9606.ENSP00000307617	9606.ENSP00000276927	0	0	0	0	0	0	0	0.459	0.459
RAD51	RRM2B	1857551	1844085	9606.ENSP00000372088	9606.ENSP00000251810	0	0	0	0	0.25	0	0	0.308	0.459
WARS	ACSS2	1853177	1844221	9606.ENSP00000347495	9606.ENSP00000253382	0	0	0	0	0	0.432	0	0.087	0.459
DNMT1	KIAA0101	1853859	1848123	9606.ENSP00000352516	9606.ENSP00000300035	0	0	0	0	0.173	0.359	0	0.06	0.459
PPARG	LGALS3	1847090	1844285	9606.ENSP00000287820	9606.ENSP00000254301	0	0	0	0	0	0.098	0	0.424	0.458
BRCA1	PRMT1	1861387	1860583	9606.ENSP00000418960	9606.ENSP00000406162	0	0	0	0	0	0.36	0	0.187	0.457
TKT	HINT1	1860530	1848614	9606.ENSP00000405455	9606.ENSP00000304229	0	0	0	0	0	0.441	0	0.065	0.456
NDUFA13	CDKN2A	1861604	1859838	9606.ENSP00000423673	9606.ENSP00000394932	0	0	0	0	0.043	0	0	0.455	0.456
KIF2C	RRM1	1855643	1848209	9606.ENSP00000361298	9606.ENSP00000300738	0	0	0	0	0.42	0	0	0.1	0.456
VDR	BAG1	1862386	1861489	9606.ENSP00000447173	9606.ENSP00000420514	0	0	0	0	0	0.376	0	0.164	0.456
PRMT1	SETD7	1860583	1846356	9606.ENSP00000406162	9606.ENSP00000274031	0	0	0	0	0.058	0.059	0	0.434	0.455
CDKN2A	PPP1CC	1859838	1851808	9606.ENSP00000394932	9606.ENSP00000335084	0	0	0	0	0.053	0.329	0	0.21	0.455
PAPSS1	AHCY	1845706	1842666	9606.ENSP00000265174	9606.ENSP00000217426	0.064	0	0	0	0.163	0.325	0	0.092	0.455
IL10	LGALS3	1860958	1844285	9606.ENSP00000412237	9606.ENSP00000254301	0	0	0	0	0	0	0	0.454	0.454
MST1R	SLC5A5	1847736	1842895	9606.ENSP00000296474	9606.ENSP00000222248	0	0	0	0	0	0	0	0.453	0.453
FAS	KRAS	1853242	1844404	9606.ENSP00000347979	9606.ENSP00000256078	0	0	0	0	0	0	0	0.453	0.453
ARID1A	KRAS	1850249	1844404	9606.ENSP00000320485	9606.ENSP00000256078	0	0	0	0	0.076	0.054	0	0.424	0.453
RPSA	PPP1CC	1853012	1851808	9606.ENSP00000346067	9606.ENSP00000335084	0	0	0	0	0.089	0	0	0.424	0.452
PRKAA1	CDH1	1853021	1844988	9606.ENSP00000346148	9606.ENSP00000261769	0	0	0	0	0	0	0	0.452	0.452
SIRT5	ACSS1	1857002	1849917	9606.ENSP00000368552	9606.ENSP00000316924	0	0	0	0	0.044	0.047	0	0.447	0.452
AKT1	ABCB1	1846136	1845794	9606.ENSP00000270202	9606.ENSP00000265724	0	0	0	0	0.054	0	0	0.444	0.452
COMTD1	AHCY	1855702	1842666	9606.ENSP00000361616	9606.ENSP00000217426	0	0	0	0	0.055	0	0.435	0.055	0.451
VDR	ACVR1	1862386	1845380	9606.ENSP00000447173	9606.ENSP00000263640	0	0	0	0	0	0.419	0	0.093	0.451
IL10	CCL8	1860958	1858210	9606.ENSP00000412237	9606.ENSP00000378118	0	0	0	0	0.05	0	0	0.446	0.451
CTNNB1	FLCN	1852818	1846946	9606.ENSP00000344456	9606.ENSP00000285071	0	0	0	0	0	0	0	0.45	0.45
SMAD4	MST1R	1852473	1847736	9606.ENSP00000341551	9606.ENSP00000296474	0	0	0	0	0.052	0	0	0.443	0.45
VDR	PIK3CA	1862386	1845446	9606.ENSP00000447173	9606.ENSP00000263967	0	0	0	0	0	0	0	0.45	0.45
CTNNB1	FGFR3	1852818	1852258	9606.ENSP00000344456	9606.ENSP00000339824	0	0	0	0	0	0.17	0	0.364	0.45
TKT	CTNNB1	1860530	1852818	9606.ENSP00000405455	9606.ENSP00000344456	0	0	0	0	0.054	0	0.422	0.073	0.449
BRCA1	VEGFA	1861387	1855611	9606.ENSP00000418960	9606.ENSP00000361125	0	0	0	0	0	0	0	0.449	0.449
RAD51	CCT3	1857551	1847605	9606.ENSP00000372088	9606.ENSP00000295688	0.048	0	0	0	0.106	0.144	0	0.331	0.448
RET	NDE1	1853238	1852988	9606.ENSP00000347942	9606.ENSP00000345892	0	0	0	0	0.052	0	0	0.442	0.448
PTCH1	HRAS	1851463	1849235	9606.ENSP00000332353	9606.ENSP00000309845	0	0	0	0	0	0	0	0.448	0.448
CREB1	BRAF	1859295	1847131	9606.ENSP00000387699	9606.ENSP00000288602	0	0	0	0	0.21	0	0	0.329	0.448
WDR16	SETD7	1852219	1846356	9606.ENSP00000339449	9606.ENSP00000274031	0	0	0	0	0.072	0.389	0	0.104	0.447
RNF139	DIRC2	1848594	1844845	9606.ENSP00000304051	9606.ENSP00000261038	0	0	0	0	0	0	0	0.447	0.447
CLPB	CAT	1847462	1843587	9606.ENSP00000294053	9606.ENSP00000241052	0	0	0	0	0.061	0	0	0.436	0.447
CDC73	RET	1854592	1853238	9606.ENSP00000356405	9606.ENSP00000347942	0	0	0	0	0	0	0	0.447	0.447
HRAS	PPARG	1849235	1847090	9606.ENSP00000309845	9606.ENSP00000287820	0	0	0	0	0	0.103	0	0.408	0.446
SIRT5	TP53	1857002	1846083	9606.ENSP00000368552	9606.ENSP00000269305	0	0	0	0	0.049	0.097	0	0.407	0.446
AK2	CTNNB1	1853107	1852818	9606.ENSP00000346921	9606.ENSP00000344456	0.066	0	0	0	0.104	0.042	0.17	0.295	0.445
COX5A	CAT	1849982	1843587	9606.ENSP00000317780	9606.ENSP00000241052	0	0	0	0	0	0	0	0.445	0.445
PIK3CA	VHL	1845446	1844441	9606.ENSP00000263967	9606.ENSP00000256474	0	0	0	0	0	0	0	0.444	0.444
POLA1	GALK1	1856974	1843038	9606.ENSP00000368349	9606.ENSP00000225614	0	0	0	0	0.051	0	0	0.438	0.444
FHIT	KRAS	1852550	1844404	9606.ENSP00000342087	9606.ENSP00000256078	0	0	0	0	0	0	0	0.443	0.443
VDR	IL10	1862386	1860958	9606.ENSP00000447173	9606.ENSP00000412237	0	0	0	0	0	0	0	0.443	0.443
ACVR1B	PEG10	1862229	1861308	9606.ENSP00000442656	9606.ENSP00000417587	0	0	0	0	0	0.336	0	0.196	0.443
TGFBR2	MLH1	1853779	1843304	9606.ENSP00000351905	9606.ENSP00000231790	0	0	0	0	0	0	0	0.443	0.443
PEG10	ACVR1	1861308	1845380	9606.ENSP00000417587	9606.ENSP00000263640	0	0	0	0	0	0.336	0	0.194	0.442
CTAG1B	TP53	1851491	1846083	9606.ENSP00000332602	9606.ENSP00000269305	0	0	0	0	0	0	0	0.442	0.442
FLCN	VHL	1846946	1844441	9606.ENSP00000285071	9606.ENSP00000256474	0	0	0	0	0	0	0	0.442	0.442
TP53	COX4I1	1846083	1844229	9606.ENSP00000269305	9606.ENSP00000253452	0	0	0	0	0	0	0	0.442	0.442
IL10	CDH1	1860958	1844988	9606.ENSP00000412237	9606.ENSP00000261769	0	0	0	0	0	0	0	0.442	0.442
NDE1	HINT1	1852988	1848614	9606.ENSP00000345892	9606.ENSP00000304229	0	0	0	0	0	0	0	0.441	0.441
ABCA1	CRP	1856172	1844348	9606.ENSP00000363868	9606.ENSP00000255030	0	0	0	0	0	0	0	0.441	0.441
ASNA1	HSPA8	1853509	1843112	9606.ENSP00000349887	9606.ENSP00000227378	0	0	0	0	0.049	0.217	0	0.309	0.441
MARCO	NOC2L	1850096	1850000	9606.ENSP00000318916	9606.ENSP00000317992	0	0	0	0	0	0	0	0.441	0.441
SIRT5	PIK3CA	1857002	1845446	9606.ENSP00000368552	9606.ENSP00000263967	0	0	0	0	0.059	0.117	0	0.381	0.441
CDH1	NME1	1844988	1842174	9606.ENSP00000261769	9606.ENSP00000013034	0	0	0	0	0	0	0	0.441	0.441
DNMT1	RRM1	1853859	1848209	9606.ENSP00000352516	9606.ENSP00000300738	0.048	0	0	0	0.398	0.065	0	0.079	0.441
ABL1	IFNA1	1855665	1846520	9606.ENSP00000361423	9606.ENSP00000276927	0	0	0	0	0	0	0	0.441	0.441
TKT	HSPA8	1860530	1843112	9606.ENSP00000405455	9606.ENSP00000227378	0	0	0	0	0.105	0.116	0	0.35	0.441
VEGFA	AMHR2	1855611	1844545	9606.ENSP00000361125	9606.ENSP00000257863	0	0	0	0	0	0	0	0.44	0.44
VEGFA	IFNA1	1855611	1846520	9606.ENSP00000361125	9606.ENSP00000276927	0	0	0	0	0	0	0	0.44	0.44
CRP	SULT2A1	1844348	1842878	9606.ENSP00000255030	9606.ENSP00000222002	0	0	0	0	0	0	0	0.44	0.44
TKT	EEF2	1860530	1849021	9606.ENSP00000405455	9606.ENSP00000307940	0	0	0	0	0.153	0	0	0.366	0.44
PTEN	ARID1A	1855586	1850249	9606.ENSP00000361021	9606.ENSP00000320485	0	0	0	0	0.092	0	0	0.408	0.439
ABCB1	SALL4	1845794	1842636	9606.ENSP00000265724	9606.ENSP00000217086	0	0	0	0	0	0	0	0.438	0.438
STK11	PPARG	1850687	1847090	9606.ENSP00000324856	9606.ENSP00000287820	0	0	0	0	0	0.137	0	0.375	0.438
NOC2L	RPL27	1850000	1844249	9606.ENSP00000317992	9606.ENSP00000253788	0	0	0	0	0.073	0.417	0	0	0.436
SERPINB4	CDH1	1852698	1844988	9606.ENSP00000343445	9606.ENSP00000261769	0	0	0	0	0	0	0	0.436	0.436
SMAD4	ID2	1852473	1843383	9606.ENSP00000341551	9606.ENSP00000234091	0	0	0	0	0	0.087	0	0.408	0.436
VDR	PPARG	1862386	1847090	9606.ENSP00000447173	9606.ENSP00000287820	0	0	0	0.715	0	0.36	0	0.442	0.436
SIRT3	AKT1	1857564	1846136	9606.ENSP00000372191	9606.ENSP00000270202	0	0	0	0	0.072	0.097	0	0.38	0.435
RORA	NME1	1844931	1842174	9606.ENSP00000261523	9606.ENSP00000013034	0	0	0	0	0	0.285	0	0.243	0.435
PBRM1	PIK3CA	1858233	1845446	9606.ENSP00000378307	9606.ENSP00000263967	0	0	0	0	0.237	0.173	0	0.176	0.435
KDM4C	SETD7	1857360	1846356	9606.ENSP00000370710	9606.ENSP00000274031	0	0	0	0	0.065	0.106	0	0.379	0.435
GABBR1	LGALS3	1856594	1844285	9606.ENSP00000366233	9606.ENSP00000254301	0	0	0	0	0	0	0	0.434	0.434
TGFBR2	CDH1	1853779	1844988	9606.ENSP00000351905	9606.ENSP00000261769	0	0	0	0	0	0.072	0	0.415	0.434
PTCH1	AKT1	1851463	1846136	9606.ENSP00000332353	9606.ENSP00000270202	0	0	0	0	0.052	0	0	0.427	0.434
CTNNB1	AK8	1852818	1847970	9606.ENSP00000344456	9606.ENSP00000298545	0.066	0	0	0	0.104	0.042	0.17	0.28	0.433
TXNDC5	SLC26A8	1857091	1853215	9606.ENSP00000369081	9606.ENSP00000347778	0	0	0	0	0.044	0	0	0.432	0.433
RET	PPARG	1853238	1847090	9606.ENSP00000347942	9606.ENSP00000287820	0	0	0	0	0	0.137	0	0.37	0.433
AK1	ADA	1855840	1855776	9606.ENSP00000362249	9606.ENSP00000361965	0	0	0	0	0.055	0	0	0.423	0.432
MYCL1	HRAS	1858482	1849235	9606.ENSP00000380494	9606.ENSP00000309845	0	0	0	0	0	0	0	0.43	0.43
ACVR1B	CTNNB1	1862229	1852818	9606.ENSP00000442656	9606.ENSP00000344456	0	0	0	0	0.066	0.293	0	0.205	0.429
VEGFA	LGALS3	1855611	1844285	9606.ENSP00000361125	9606.ENSP00000254301	0	0	0	0	0	0	0	0.429	0.429
RASSF4	HRAS	1852240	1849235	9606.ENSP00000339692	9606.ENSP00000309845	0	0	0	0	0	0	0	0.429	0.429
BRCA1	VCP	1861387	1853766	9606.ENSP00000418960	9606.ENSP00000351777	0	0	0	0	0	0.36	0	0.143	0.428
PIM1	UCK2	1855921	1854680	9606.ENSP00000362608	9606.ENSP00000356853	0	0	0	0	0	0.049	0	0.424	0.428
KIF2C	BCAS2	1855643	1855053	9606.ENSP00000361298	9606.ENSP00000358554	0	0	0	0	0	0	0	0.428	0.428
COASY	ACSL1	1863897	1846727	9606.ENSP00000464814	9606.ENSP00000281455	0.061	0	0	0	0.043	0	0	0.414	0.427
RRM2	CDH1	1854033	1844988	9606.ENSP00000353770	9606.ENSP00000261769	0	0	0	0	0	0.378	0	0.116	0.427
RASSF4	KRAS	1852240	1844404	9606.ENSP00000339692	9606.ENSP00000256078	0	0	0	0	0	0	0	0.426	0.426
FHIT	CDH1	1852550	1844988	9606.ENSP00000342087	9606.ENSP00000261769	0	0	0	0	0	0	0	0.426	0.426
CREB1	FHL2	1859295	1850494	9606.ENSP00000387699	9606.ENSP00000322909	0	0	0	0	0	0.325	0	0.185	0.426
COASY	ABCA1	1863897	1856172	9606.ENSP00000464814	9606.ENSP00000363868	0	0	0	0	0.067	0	0	0.409	0.425
MT-CO1	PPARG	1854132	1847090	9606.ENSP00000354499	9606.ENSP00000287820	0	0	0	0	0	0	0	0.425	0.424
TKT	PCMT1	1860530	1854577	9606.ENSP00000405455	9606.ENSP00000356348	0	0	0	0	0	0.417	0	0.053	0.424
PNMT	VHL	1846103	1844441	9606.ENSP00000269582	9606.ENSP00000256474	0	0	0	0	0	0	0	0.424	0.424
ABCC8	SLC5A5	1857861	1842895	9606.ENSP00000374467	9606.ENSP00000222248	0	0	0	0	0	0	0	0.424	0.424
ADA	CAT	1855776	1843587	9606.ENSP00000361965	9606.ENSP00000241052	0	0	0	0	0.073	0	0	0.404	0.424
PTEN	PTCH1	1855586	1851463	9606.ENSP00000361021	9606.ENSP00000332353	0	0	0	0	0.053	0	0	0.416	0.423
RNF139	PRCC	1848594	1846199	9606.ENSP00000304051	9606.ENSP00000271526	0	0	0	0	0	0	0	0.423	0.423
RPL37A	COX7C	1861343	1843871	9606.ENSP00000418082	9606.ENSP00000247655	0	0	0	0	0.4	0	0	0.077	0.423
PRMT1	ABCB1	1860583	1845794	9606.ENSP00000406162	9606.ENSP00000265724	0	0	0	0	0.053	0	0	0.416	0.423
BRCA1	KIF2C	1861387	1855643	9606.ENSP00000418960	9606.ENSP00000361298	0	0	0	0	0.359	0	0	0.133	0.422
ACSS2	CAT	1844221	1843587	9606.ENSP00000253382	9606.ENSP00000241052	0	0	0	0	0.125	0	0	0.367	0.422
MT-CO3	SLC25A4	1854274	1846728	9606.ENSP00000354982	9606.ENSP00000281456	0	0	0	0	0	0	0	0.422	0.422
ABL2	CAT	1861715	1843587	9606.ENSP00000427562	9606.ENSP00000241052	0.05	0	0	0	0.055	0.38	0	0.08	0.42
SERPINA1	MMP11	1853254	1842502	9606.ENSP00000348068	9606.ENSP00000215743	0	0	0	0	0.045	0.36	0	0.125	0.419
CREB1	ARAF	1859295	1856599	9606.ENSP00000387699	9606.ENSP00000366244	0	0	0	0	0	0	0	0.419	0.419
DCC	EPHB2	1859404	1856154	9606.ENSP00000389140	9606.ENSP00000363763	0	0	0	0	0.09	0.146	0	0.311	0.419
NDE1	PDE4B	1852988	1851429	9606.ENSP00000345892	9606.ENSP00000332116	0	0	0	0	0	0	0	0.418	0.418
CRTC1	STK11	1852882	1850687	9606.ENSP00000345001	9606.ENSP00000324856	0	0	0	0	0	0.1	0	0.38	0.418
ABL1	HSPA8	1855665	1843112	9606.ENSP00000361423	9606.ENSP00000227378	0	0	0	0	0	0.246	0	0.259	0.418
PIK3CA	MLH1	1845446	1843304	9606.ENSP00000263967	9606.ENSP00000231790	0	0	0	0	0.056	0	0	0.409	0.418
CRTC1	PIK3CA	1852882	1845446	9606.ENSP00000345001	9606.ENSP00000263967	0	0	0	0	0.056	0	0	0.408	0.417
AK1	ATP1A1	1855840	1847591	9606.ENSP00000362249	9606.ENSP00000295598	0.048	0	0	0	0.052	0	0.401	0.05	0.417
POLE3	PHF20	1856055	1856030	9606.ENSP00000363284	9606.ENSP00000363124	0	0	0	0	0	0.417	0	0	0.417
PRKAA1	AKT1	1853021	1846136	9606.ENSP00000346148	9606.ENSP00000270202	0	0	0.246	0.717	0.054	0.186	0	0.811	0.417
WARS	PSMG2	1853177	1850783	9606.ENSP00000347495	9606.ENSP00000325919	0	0	0	0	0	0.417	0	0	0.417
AK1	CTNNB1	1855840	1852818	9606.ENSP00000362249	9606.ENSP00000344456	0.066	0	0	0	0.104	0.047	0.17	0.255	0.416
IL10	PBRM1	1860958	1858233	9606.ENSP00000412237	9606.ENSP00000378307	0	0	0	0	0	0	0	0.416	0.416
CREB1	DCTD	1859295	1853462	9606.ENSP00000387699	9606.ENSP00000349576	0	0	0	0	0	0	0	0.417	0.416
VCP	SERPINA1	1853766	1853254	9606.ENSP00000351777	9606.ENSP00000348068	0	0	0	0	0	0.36	0	0.125	0.416
FHL2	RORA	1850494	1844931	9606.ENSP00000322909	9606.ENSP00000261523	0	0	0	0	0	0	0	0.416	0.416
CDC73	PRCC	1854592	1846199	9606.ENSP00000356405	9606.ENSP00000271526	0	0	0	0	0	0	0	0.416	0.416
AK1	ABL1	1855840	1855665	9606.ENSP00000362249	9606.ENSP00000361423	0	0	0	0	0.042	0.067	0	0.398	0.415
ACSS1	ACSL1	1849917	1846727	9606.ENSP00000316924	9606.ENSP00000281455	0	0	0	0	0.1	0	0	0.376	0.415
CDKN2A	RAD51	1859838	1857551	9606.ENSP00000394932	9606.ENSP00000372088	0	0	0	0	0.055	0.052	0	0.4	0.415
ABCC2	SULT2A1	1855255	1842878	9606.ENSP00000359478	9606.ENSP00000222002	0	0	0	0	0.157	0	0	0.333	0.414
ARID1A	PIK3CA	1850249	1845446	9606.ENSP00000320485	9606.ENSP00000263967	0	0	0	0	0.119	0	0	0.362	0.414
TGFBR2	KRAS	1853779	1844404	9606.ENSP00000351905	9606.ENSP00000256078	0	0	0	0	0	0	0	0.415	0.414
ABCA1	ABCG1	1856172	1854276	9606.ENSP00000363868	9606.ENSP00000354995	0	0	0	0.623	0.084	0	0	0.953	0.413
HRAS	PRKAR2B	1849235	1845791	9606.ENSP00000309845	9606.ENSP00000265717	0	0	0	0	0.055	0.132	0	0.342	0.413
RAD51	AKT1	1857551	1846136	9606.ENSP00000372088	9606.ENSP00000270202	0	0	0	0	0.054	0.099	0	0.366	0.412
ATP1A1	YWHAE	1847591	1845524	9606.ENSP00000295598	9606.ENSP00000264335	0	0	0	0	0.055	0.38	0	0.076	0.411
ABCB1	PIK3CA	1845794	1845446	9606.ENSP00000265724	9606.ENSP00000263967	0	0	0	0	0.054	0.065	0	0.386	0.41
BRCA1	FHIT	1861387	1852550	9606.ENSP00000418960	9606.ENSP00000342087	0	0	0	0	0	0	0	0.41	0.41
AK8	ATP1A1	1847970	1847591	9606.ENSP00000298545	9606.ENSP00000295598	0.048	0	0	0	0	0	0.401	0.05	0.41
TP53	CRP	1846083	1844348	9606.ENSP00000269305	9606.ENSP00000255030	0	0	0	0	0	0	0	0.41	0.41
RRM1	HSPA8	1848209	1843112	9606.ENSP00000300738	9606.ENSP00000227378	0	0	0	0	0.101	0	0	0.369	0.41
ACVRL1	CTNNB1	1857773	1852818	9606.ENSP00000373574	9606.ENSP00000344456	0	0	0	0	0.066	0.293	0	0.177	0.409
MT-CO2	RRM2B	1854241	1844085	9606.ENSP00000354876	9606.ENSP00000251810	0	0	0	0	0.066	0	0	0.394	0.409
ARAF	PTEN	1856599	1855586	9606.ENSP00000366244	9606.ENSP00000361021	0	0	0	0	0.1	0.136	0	0.301	0.409
RAD51	STK11	1857551	1850687	9606.ENSP00000372088	9606.ENSP00000324856	0.055	0	0	0	0.055	0.17	0	0.297	0.409
ADORA3	ADK	1855085	1847021	9606.ENSP00000358730	9606.ENSP00000286621	0	0	0	0	0	0	0	0.409	0.408
IL10	CDKN2A	1860958	1859838	9606.ENSP00000412237	9606.ENSP00000394932	0	0	0	0	0	0	0	0.408	0.408
TFDP3	APC	1859036	1844508	9606.ENSP00000385461	9606.ENSP00000257430	0	0	0	0	0	0	0	0.409	0.408
KIF2C	YWHAE	1855643	1845524	9606.ENSP00000361298	9606.ENSP00000264335	0	0	0	0	0.043	0.084	0.36	0.07	0.408
AKT1	COX4I1	1846136	1844229	9606.ENSP00000270202	9606.ENSP00000253452	0	0	0	0	0	0	0	0.409	0.408
PTEN	FHIT	1855586	1852550	9606.ENSP00000361021	9606.ENSP00000342087	0	0	0	0	0.042	0.054	0	0.4	0.408
PPARG	MTTP	1847090	1845764	9606.ENSP00000287820	9606.ENSP00000265517	0	0	0	0	0	0	0	0.408	0.408
MT-CO2	AFG3L2	1854241	1846068	9606.ENSP00000354876	9606.ENSP00000269143	0	0	0	0	0.046	0	0	0.405	0.408
RPL37A	RAD51	1861343	1857551	9606.ENSP00000418082	9606.ENSP00000372088	0	0	0	0	0	0.375	0	0.092	0.408
VEGFA	TGFBR2	1855611	1853779	9606.ENSP00000361125	9606.ENSP00000351905	0	0	0	0	0	0	0	0.408	0.408
ABL2	KRAS	1861715	1844404	9606.ENSP00000427562	9606.ENSP00000256078	0	0	0	0	0.073	0.271	0	0.194	0.408
TGFBR2	HRAS	1853779	1849235	9606.ENSP00000351905	9606.ENSP00000309845	0	0	0	0	0	0	0	0.409	0.408
VEGFA	PTCH1	1855611	1851463	9606.ENSP00000361125	9606.ENSP00000332353	0	0	0	0	0	0	0	0.407	0.407
APAF1	VEGFA	1862487	1855611	9606.ENSP00000448165	9606.ENSP00000361125	0	0	0	0	0	0	0	0.407	0.407
UCK2	SULT2B1	1854680	1842398	9606.ENSP00000356853	9606.ENSP00000201586	0	0	0	0	0.054	0	0	0.399	0.407
STARD9	YWHAE	1847246	1845524	9606.ENSP00000290607	9606.ENSP00000264335	0	0	0	0	0	0.084	0.36	0.07	0.407
BAG1	AKT1	1861489	1846136	9606.ENSP00000420514	9606.ENSP00000270202	0	0	0	0	0.051	0.17	0	0.307	0.406
RAD51	ADK	1857551	1847021	9606.ENSP00000372088	9606.ENSP00000286621	0.048	0	0	0	0	0	0	0.402	0.406
MT-CO3	CAT	1854274	1843587	9606.ENSP00000354982	9606.ENSP00000241052	0	0	0	0	0	0	0	0.405	0.405
HSPA8	NME1	1843112	1842174	9606.ENSP00000227378	9606.ENSP00000013034	0.063	0	0	0	0.165	0.052	0	0.292	0.405
RPL41	COX7C	1861501	1843871	9606.ENSP00000420821	9606.ENSP00000247655	0	0	0	0	0.405	0	0	0	0.405
SMAD4	FHL2	1852473	1850494	9606.ENSP00000341551	9606.ENSP00000322909	0	0	0	0	0.053	0.359	0	0.097	0.404
CREB1	PTCH1	1859295	1851463	9606.ENSP00000387699	9606.ENSP00000332353	0	0	0	0	0	0	0	0.404	0.404
APAF1	YWHAE	1862487	1845524	9606.ENSP00000448165	9606.ENSP00000264335	0	0	0	0	0.056	0.378	0	0.066	0.404
MET	NME1	1849944	1842174	9606.ENSP00000317272	9606.ENSP00000013034	0	0	0	0	0.049	0.184	0	0.292	0.402
BRCA1	FHL2	1861387	1850494	9606.ENSP00000418960	9606.ENSP00000322909	0	0	0	0	0	0.36	0	0.104	0.402
MT-CO1	CAT	1854132	1843587	9606.ENSP00000354499	9606.ENSP00000241052	0	0	0	0	0.053	0	0	0.395	0.402
SIRT5	CAT	1857002	1843587	9606.ENSP00000368552	9606.ENSP00000241052	0	0	0	0	0.054	0	0	0.394	0.402
ABL2	PIK3CA	1861715	1845446	9606.ENSP00000427562	9606.ENSP00000263967	0	0	0	0	0.055	0.11	0	0.346	0.402
EEF2	AHCY	1849021	1842666	9606.ENSP00000307940	9606.ENSP00000217426	0	0	0	0	0.249	0	0	0.236	0.402
ARAF	YWHAE	1856599	1845524	9606.ENSP00000366244	9606.ENSP00000264335	0	0	0	0	0.054	0.361	0	0.09	0.402
PDE4B	HRAS	1851429	1849235	9606.ENSP00000332116	9606.ENSP00000309845	0	0	0	0	0.054	0.095	0	0.355	0.4
PRKAR2B	KRAS	1845791	1844404	9606.ENSP00000265717	9606.ENSP00000256078	0	0	0	0	0.055	0.132	0	0.328	0.4
IL10	KIAA0101	1860958	1848123	9606.ENSP00000412237	9606.ENSP00000300035	0	0	0	0	0	0	0	0.4	0.4
IFNA1	TP53	1846520	1846083	9606.ENSP00000276927	9606.ENSP00000269305	0	0	0	0	0	0	0	0.4	0.4
CDKN2A	FAS	1859838	1853242	9606.ENSP00000394932	9606.ENSP00000347979	0	0	0	0	0	0	0	0.4	0.4
